# Supplementary material for: Prediction of initiation and cessation of breastfeeding from late pregnancy to 16 weeks: the Feeding Your Baby (FYB) cohort study
Source: PubMed Central journal article supplement — BMJ Open. 2013 Aug 1;3(8):e003274. doi: 10.1136/bmjopen-2013-003274 (PMC3733309; doi:10.1136/bmjopen-2013-003274), 2013-08-01
Supplement: bmjopen-2013-003274.draft_revisions.pdf [file bmjopen-2013-003274.draft_revisions.pdf]

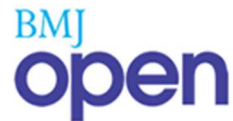

**Prediction of initiation and cessation of breast feeding from late pregnancy to 16 weeks: The Feeding Your Baby (FYB) cohort study**

|                                 |                                                                                                                                                                                                                                                                                                                                                                                                                                                                                                                                                                                                                    |
|---------------------------------|--------------------------------------------------------------------------------------------------------------------------------------------------------------------------------------------------------------------------------------------------------------------------------------------------------------------------------------------------------------------------------------------------------------------------------------------------------------------------------------------------------------------------------------------------------------------------------------------------------------------|
| Journal:                        | <i>BMJ Open</i>                                                                                                                                                                                                                                                                                                                                                                                                                                                                                                                                                                                                    |
| Manuscript ID:                  | bmjopen-2013-003274                                                                                                                                                                                                                                                                                                                                                                                                                                                                                                                                                                                                |
| Article Type:                   | Research                                                                                                                                                                                                                                                                                                                                                                                                                                                                                                                                                                                                           |
| Date Submitted by the Author:   | 21-May-2013                                                                                                                                                                                                                                                                                                                                                                                                                                                                                                                                                                                                        |
| Complete List of Authors:       | Donnan, Peter; University of Dundee, Population Health Sciences<br>Dalzell, Janet; NHS, Directorate of Public Health<br>Symon, Andrew; University of Dundee, School of Nursing and Midwifery<br>Rauchhaus, Petra; University of Dundee, Dundee Epidemiology and Biostatistics Unit<br>Monteith-Hodge, Ewa; University of Dundee, School of Nursing and Midwifery<br>Kellett, Gillian; University of Dundee, School of Nursing and Midwifery<br>Wyatt, Jeremy; Leeds University Medical School, Yorkshire Centre for Health Informatics<br>Whitford, Heather; University of Dundee, School of Nursing and Midwifery |
| <b>Primary Subject Heading</b>: | Public health                                                                                                                                                                                                                                                                                                                                                                                                                                                                                                                                                                                                      |
| Secondary Subject Heading:      | Public health, Health informatics                                                                                                                                                                                                                                                                                                                                                                                                                                                                                                                                                                                  |
| Keywords:                       | Health informatics < BIOTECHNOLOGY & BIOINFORMATICS, PUBLIC HEALTH, Community child health < PAEDIATRICS, NUTRITION & DIETETICS                                                                                                                                                                                                                                                                                                                                                                                                                                                                                    |
|                                 |                                                                                                                                                                                                                                                                                                                                                                                                                                                                                                                                                                                                                    |

1  
2  
3 **Prediction of initiation and cessation of breast feeding from late**  
4 **pregnancy to 16 weeks: The Feeding Your Baby (FYB) cohort study**  
5  
6  
7

8  
9 **Peter T Donnan, Janet Dalzell, Andrew Symon, Petra Rauchhaus, Ewa Monteith-**  
10 **Hodge, Gillian Kellett, Jeremy C Wyatt, Heather M Whitford**  
11

12  
13  
14  
15 Dundee Epidemiology and Biostatistics Unit, Division of Population Health Sciences, Medical  
16 Research Institute, University of Dundee, Dundee, Scotland, UK, Peter T Donnan, professor  
17 Directorate of Public Health, NHS Tayside, Scotland, UK, Janet Dalzell, NHS Breastfeeding  
18 Coordinator

19 School of Nursing and Midwifery, University of Dundee, Dundee, Scotland, UK, Andrew Symon,  
20 lecturer

21 Dundee Epidemiology and Biostatistics Unit, Division of Population Health Sciences, Medical  
22 Research Institute, University of Dundee, Dundee, Scotland, UK, Petra Rauchhaus, statistician

23 School of Nursing and Midwifery, University of Dundee, Dundee, Scotland, UK, Ewa Monteith-  
24 Hodge, research assistant

25 School of Nursing and Midwifery, University of Dundee, Dundee, Scotland, UK, Gillian Kellett,  
26 research assistant

27 Leeds Institute of Health Sciences, University of Leeds, Leeds, England, UK, Jeremy C Wyatt,  
28 professor

29 School of Nursing and Midwifery, University of Dundee, Dundee, Scotland, UK, Heather M Whitford,  
30 lecturer.  
31

32  
33 Correspondence to: Heather M Whitford, School of Nursing and Midwifery, University of Dundee, 11  
34 Airlie Pl, Dundee DD1 4HJ, Scotland, UK, [h.m.whitford@dundee.ac.uk](mailto:h.m.whitford@dundee.ac.uk), tel - +44-1382 388647, fax  
35 - +44-1382 388533  
36  
37  
38  
39

40 Key words: mobile phone, SMS text messaging, breastfeeding, prediction model, cohort  
41  
42  
43  
44  
45  
46  
47  
48  
49  
50  
51  
52  
53  
54  
55  
56  
57  
58  
59  
60

## Abstract

**Objective** To derive prediction models for both initiation and cessation of breastfeeding using demographic, psychological and obstetric variables

**Design** A prospective cohort study

**Setting** Women delivering at Ninewells Hospital, Dundee, UK.

**Data Sources** Demographic data and psychological measures were obtained during pregnancy by questionnaire. Birth details, feeding method at birth and at hospital discharge were obtained from the Ninewells hospital database, Dundee, UK. Breastfeeding women were followed-up by text messages 2-weekly until 16 weeks or until breastfeeding was discontinued to ascertain feeding method and feeding intentions.

### Participants

Pregnant women over 30 weeks gestation aged 16 years and above, living in Dundee, booked to deliver at Ninewells Hospital, Dundee and able to speak English.

### Main outcome measure

Initiation and Cessation of breastfeeding

### Results

From the total cohort of women at delivery ( $n = 344$ ) 68% (95% CI 63% to 73%) of women had started breastfeeding at discharge. Significant predictors of initiating breastfeeding were older age, parity, greater intention to breastfeed from a Theory of Planned Behaviour (TPB)-based questionnaire, higher Iowa Infant Feeding Assessment Scale (IIFAS) score as well as living with a husband or partner. For the final model the AUROC was 0.967. For those who initiated breastfeeding ( $n = 233$ ), the strongest predictors of stopping were low intention to breastfeed from TPB, low IIFAS score and non-managerial / professional occupations.

### Conclusions

The findings from this study will be used to inform the protocol for an intervention study to encourage and support prolonged breastfeeding as intentions appear to be a key intervention focus for initiation. The predictive models could be used to identify women at high risk of not initiating and also women at high risk of stopping for interventions to improve longevity of breastfeeding.

## Article Summary

### Article Focus

- To identify antenatal factors which predict women who will initiate breastfeeding;
- Assess the critical time points for the discontinuation of breastfeeding;
- To identify the key antenatal and postnatal attributes and beliefs associated with continuation / cessation and develop predictive models

### Key Messages

- Comprehensive assessment of intentions and breastfeeding via novel SMS text messaging facilitated accurate prediction of breast feeding initiation and cessation
- Psychological factors as well as previous experience were shown to be important predictors of cessation before 16 weeks in predictive algorithms indicating the potential for early intervention
- These findings challenge the current interpretation of the UNICEF guidelines and suggest that a full discussion about infant feeding options in the antenatal period, including asking about intentions, could be used to identify women at risk of early cessation of breastfeeding.

### Strengths and Limitations of this study

A key strength was the accurate, validated, real-time and efficient measurement of method of infant feeding through SMS messaging. The study incorporated intentions and psychological factors based on the Theory of Planned Behaviour as predictors of initiation and cessation. This allowed the development of predictive algorithms and points to targeting the development and trialling of interventions. This was based on a relatively large cohort covering the antenatal period to 16 weeks postnatal. One limitation may be the lack of ethnic diversity in the study population which is reflected in the ethnic structure of Tayside.

## Introduction

The short and long-term health benefits of breast feeding for both mother and child are well documented.<sup>1-4</sup> Consequently the current WHO recommendation is that infants should be exclusively breastfed for the first six months.<sup>5</sup> Most developed countries report that a minority of infants are exclusively breastfeeding at 6 months (40% Netherlands; 13% USA) and in the UK exclusive breastfeeding continued after 6 months in less than 1%.<sup>6</sup> There has been some success in the UK in improving the number of women who start breastfeeding: initiation rates of breastfeeding rose in Scotland from 63% in 2000 to 74% in 2010.<sup>7</sup> However targets to improve the rate of exclusive feeding at 6 – 8 weeks have proved more challenging. The Scottish Government aimed to increase exclusive breastfeeding at 6 – 8 weeks over a 4 year period to 33.3% by 2010/11<sup>8</sup>, however in 2010/11 the rate remained unchanged at 26.5%.<sup>9</sup> Given the rapid decline in breastfeeding in the immediate postnatal period, the failure to meet government targets and follow WHO recommendations, more detailed information about current practices and attitudes and the potential for intervention is required.

Maternal demographics and previous breastfeeding experience are known to be associated with both initiation as well as duration of breastfeeding<sup>9-10</sup> however these variables are not amenable to behavioural change interventions. The measurement of attitudinal factors such as the Iowa Infant Feeding Assessment Scale (IIFAS)<sup>11</sup> has shown promise as a way of improving the accuracy of prediction of the initiation of breastfeeding behaviour. The IIFAS has been found to predict breastfeeding initiation in a variety of settings including USA<sup>11</sup>, Australia<sup>12</sup>, Scotland<sup>13-14</sup>, Northern Ireland<sup>15</sup> and Romania.<sup>16</sup> However these studies have either only measured feeding at birth<sup>14</sup>, until discharge from hospital<sup>14,15</sup> or by retrospective maternal report.<sup>16</sup> The only study which prospectively followed women over a prolonged period was carried out in an area of high breastfeeding (94% initiation rate) and was biased by recruitment of women and measurement of baseline variables in the first 3 days after birth (rather than during pregnancy) by which time attitudes to infant feeding are likely to have been affected by experiences since birth.<sup>12</sup>

Hence there is little evidence for interventions based on psychological and attitudinal variables to improve breastfeeding outcomes. However a World Health Organisation programme (The Baby Friendly Initiative, BFI) to protect and support the initiation and continuation of breastfeeding by the implementation of evidence-based care in maternity hospitals is well-established.<sup>17</sup> Many hospitals and community settings strive to achieve 'UNICEF Baby Friendly Status' and there is some evidence that BFI accreditation can improve breastfeeding rates.<sup>18-20</sup> Guidance from UNICEF for Step 3 of BFI accreditation, in the context of information provision, 'strongly recommends that pregnant women are not merely asked a closed question about how they plan to feed their baby.' (UNICEF 2011, page 13).<sup>21</sup> This is to encourage a more open discussion to take place and to allow women to make a final decision about feeding method after delivery. While the recommendation does not explicitly preclude a discussion about feeding intentions in the antenatal period, the guidelines suggest that the documentation of antenatal feeding intention should be avoided. In practice this has been interpreted more stringently; intentions are not discussed at all.

Building on past research we designed an exploratory longitudinal study using mixed methodology, including use of the IIFAS<sup>11</sup> and psychological variables guided by the Theory of Planned Behaviour<sup>22</sup> captured during the antenatal period, to understand and predict women's initiation and duration of breastfeeding in an area of low breastfeeding commencement. Use of the MRC framework<sup>23</sup> informed the qualitative and quantitative components of the study enabling us to advance our understanding of women's intentions and attitudes towards infant feeding. The study used SMS text messaging, a novel method of data collection, to follow up women after delivery. The validity and reliability of the method of SMS text messaging has already been reported elsewhere<sup>24</sup> as well as some of the qualitative results.<sup>25</sup>

This paper reports the identification of i) antenatal factors which predict women who will initiate breastfeeding; ii) the critical time points for the discontinuation of breastfeeding; and iii) the key antenatal and postnatal attributes and beliefs associated with continuation / cessation

From these data a predictive model was derived to identify those at high risk of stopping breastfeeding. The findings from this study will inform the recruitment protocol and design of an intervention to encourage breastfeeding in a future RCT testing the intervention efficacy.

## Methods

### Design

A prospective cohort study of the method of infant feeding following delivery.

### Participants

Pregnant women over 30 weeks gestation aged 16 years and above, living in Dundee, booked to deliver at Ninewells Hospital and able to speak English.

### Measures

Five data collection points were used:

1. Baseline data - self-completed questionnaire, third trimester of pregnancy:

Background demographic:

- Age, cohabitation and residency status, years since leaving school and occupation. Socio-economic status derived from postcode and corresponding SIMD scores.

Obstetric measures:

- Expected Date of Delivery (EDD)
- Parity
- Previous infant feeding.

Psychological measures:

- *Iowa Infant Feeding Attitude Scale (IIFAS)*<sup>11</sup> a 17-item questionnaire with 5-point Likert scale response format from strongly agree to strongly disagree. Scores range from 17 – 85: higher score = more positive attitude to breastfeeding.
- *Theory of Planned Behaviour (TPB) questionnaire* study-specific 13 item questionnaire informed by the theories of planned behaviour and self-efficacy<sup>22</sup> assessed Attitude to breastfeeding (4 items), Social norm (2 items), Perceived Behavioural Control (PBC) (3 items) and Intention (4 items) each recorded on a 5-point scale from strongly agree to strongly disagree.

2. Delivery data - obtained through hospital records:

- Date of delivery, method of delivery, sex and weight of baby, method of infant feeding recorded at birth and at discharge from the hospital

Outcome variables:

3. Infant feeding collected by validated SMS text messages<sup>24</sup>:

Method(s) of infant feeding and future intentions, assessed after hospital discharge every 2 weeks using 2 text questions until response 'F' received to SMS1:

- SMS1. 'In the past 2 weeks how have you been feeding your baby?' (Answer options – only breast milk (O), both breast and formula milk (B), only formula milk (F)).
- SMS2. If 'only breast milk' or 'both breast and formula milk' – 'For how many more weeks do you plan to give your baby breast milk?'

4. Exit data (4 weeks after final SMS message):

- Method of infant feeding at study exit, problems with infant feeding, satisfaction with (breast) feeding support and satisfaction with feeding method(s) using 5-point Likert scale response format.

5. Focus groups and interviews with various sub-groups of women

### Procedure

Women were approached in the last trimester of pregnancy at clinics by a Community Midwife (CM) or a Research Assistant (RA). Consent was obtained for contact details to be passed to the study team in the form of returned postcards; women were given a baseline questionnaire and consent form. These were returned to the study team following a recruitment phone call by the RAs. Study incentives were used to motivate and encourage CMs to recruit.

The hospital database was checked weekly and as participants delivered, their delivery and discharge details were sent to the RAs. Starting from 2 weeks after delivery RAs used standard web-based messaging tools to contact all participants by text to find out current feeding practices

1  
2  
3 and intentions (Figure 1). Web-based messaging services sent automated texts via computer and  
4 used a text number for responses. Contact continued by text message every 2 weeks until the  
5 baby was 16 weeks old, or until the response 'F' was received. Women with no mobile phone or  
6 who preferred not to receive text messages were contacted by the RA on their home phone.  
7  
8

9  
10 The 'end' point for gathering text data was 2 weeks after delivery for women who started or who  
11 changed to formula feeding before 2 weeks; and on discontinuation of any breastfeeding or when  
12 the baby was 16 weeks old for the rest. Four weeks after the 'end' point women were phoned to  
13 gather final data (using an exit phone questionnaire). After the exit interview women were sent a  
14 letter thanking them and a £10 gift voucher.  
15

16 During the exit interview participants were invited to take part in a focus group or interview. These  
17 were organised with sub-groups of women representing a range of feeding experiences. Groups  
18 were kept as homogenous as possible and were held in a central location in Dundee. One to one  
19 interviews were carried out in the participant's home or in University premises. Focus groups and  
20 interviews continued until data saturation had been reached (topic guide - Appendix 1). Expenses  
21 and a 'thank you' gift voucher were given for participation in this phase. Results are reported  
22 elsewhere.  
23

### 24 **Statistical Analysis**

25 Data were analysed using SAS version 9.2. Descriptive data are presented as % (frequency) for  
26 categorical variables, and mean (95% CI) for continuous variables.  
27

28 The total IIFAS Score and the sub-scores for the TPB variables were calculated from the  
29 questionnaires. Non-normally distributed variables were converted to categorical variables when  
30 there was no viable transformation.  
31

32 Baseline data were tested for correlations with duration of breastfeeding. ANOVA and Chi-Square  
33 tests were performed to test for significant associations of baseline variables with duration of  
34 breastfeeding and intention to breastfeed, and to examine differences between groups.  
35

36 The reliability of the text message responses (method of feeding) was checked by repeat-texting a  
37 random subset of 50 participants the next day. Validity was checked by phoning a random subset  
38 of 50 participants on the same day as their text response and asking them the same questions  
39 verbally. The results, previously reported, demonstrated excellent reliability and validity.<sup>24</sup>  
40

41 Logistic regression modelling was implemented to assess predictors of initiating breastfeeding and  
42 the results expressed as Odds Ratios (OR) and their 95% CI.  
43

44 For those who initiated breastfeeding univariate associations between the duration of any and  
45 exclusive breastfeeding with baseline variables were performed using the logrank test for each of  
46 the baseline variables. Variables with a univariate significance level of at least 0.3 were chosen for  
47 potential inclusion in model building.  
48

49 Cox Proportional Hazards models were then built for all combinations of variables, utilizing both a  
50 forward and stepwise selection model including all variables. Models were then assessed for  
51 goodness of fit using the AIC and the best-fit model chosen. These models were utilised to predict  
52 the outcome of any breastfeeding and exclusive breastfeeding.  
53

54 Model performance was assessed by estimation of the c-statistic, a measure of discrimination as  
55 well as the Integrated Discrimination Index<sup>26</sup> to demonstrate the most important variables  
56 determining discrimination utilising the SAS macro %rocplus  
57 (<http://mayoresearch.mayo.edu/mayo/research/biostat/sasmacros.cfm>). Assessment of calibration  
58 was also carried out using methods suitable for censored data. Analyses were implemented in SPSS  
59 (version 18) and SAS v 9.2 (SAS Institute, Cary, NC, USA).  
60

### 60 **Sample size, Recruitment and Attrition**

1  
2  
3 The study aimed to recruit 350 women over an 8 month period, giving a recruitment rate of 35%.  
4 Of these approximately 224 (64%) would start breastfeeding (local Maternity Database figures  
5 from 2007), and 133 (38%) will still be breastfeeding at 6 - 8 weeks.<sup>9</sup> In considering predictors of  
6 maintaining breast feeding at 6 - 8 weeks from birth, and approximately 130 events, there would  
7 be 80% power to detect Hazard Ratio  $\geq 1.6$  in a Cox regression model.

8  
9 Between November 2009 and June 2010 a total of 639 postcards were received by the study team.  
10 From these, 355 women were fully consented and included in the study (55.6% of postcards  
11 received), which exceeded our target of 350 women (Figure 1). The SIMD profile of consented  
12 women broadly tracked the profile of all women who delivered in Dundee in 2009. A total of 292  
13 women were followed up to the exit questionnaire (82.3% of consented women).

14  
15 At exit 152 women were asked about participating in a focus group or interview and 138 expressed  
16 an interest (91%) Of these, 38 took part in one of seven focus groups and 40 were interviewed  
17 individually (78 in total, 56% of those interested, 22% of total sample). The results of the  
18 qualitative analysis are reported elsewhere<sup>25</sup>.

### 19 **SMS messages for collection of data about feeding method**

20 To manage the high number of automated SMS messages a computer schedule was created for the  
21 study (Figure 2). A total of 2738 text message responses were received via this automated SMS  
22 message scheduler. Data from 42 women were gathered by phone call on 114 occasions when the  
23 SMS system was unavailable. The SMS messaging service package incurred a small cost to  
24 participants: some participants may have been unable to respond if they had no credit on their  
25 phone. Two women were contacted on their home phone only: one had no mobile phone while the  
26 other preferred not to receive text messages.  
27

### 28 **Baseline Characteristics**

29 Three hundred and fifty five women were included in the study at baseline. Of these 344 (96.9%)  
30 had information on feeding status at delivery and prediction of initiating breast feeding was based  
31 on this cohort (Table 1). Baseline psychological measures (IIFAS score and TPB) are included in  
32 Table 1.  
33

### 34 **Prediction of Initiating Breastfeeding**

35 At delivery 67.7% (95% CI 62.8% to 72.6%) of women had started breastfeeding out of those with  
36 feeding data (n = 344). Significant independent predictors of initiating breastfeeding were older  
37 age, parity, greater intention to breastfeed from the TPB questionnaire, higher IIFAS score as well  
38 as living with a husband or partner as shown in table 2. For the final logistic model the AUROC was  
39 0.982 (95% CI 0.971 to 0.993) and calibration was good with Hosmer-Lemeshow test of p =  
40 0.354. A score for estimation of the probability of initiation can be easily constructed using this final  
41 equation as shown in Appendix 1. This score can be utilised as a Clinical Prediction Rule (CPR) to  
42 identify women with low probability of initiating breastfeeding and interventions can be developed  
43 that are focussed on this group. Estimation of the IDI showed that Intention to Breastfeed with an  
44 IDI of 0.212 (p < 0.001) was the strongest contributor to discrimination of initiating breastfeeding  
45 and entered the model first, followed by the IIFAS score with IDI = 0.024 (p = 0.034).  
46

### 47 **Duration of breastfeeding**

48 For those with feeding data (n = 344) Kaplan-Meier curves were fitted for exclusive breastfeeding  
49 (response 'only breast milk' to text question) and any breast milk (response 'both breast and  
50 formula milk' to text question) for each of the three subgroups defined by previous breastfeeding  
51 and parity. The duration of breastfeeding at various time points were derived (Figures 3a and b).  
52 These show that parous women who have previous experience of breastfeeding are most likely to  
53 start breastfeeding, more likely to continue to breastfeed exclusively and are slowest to discontinue  
54 any breastfeeding. In this experienced group, at 16 weeks 52.6% recorded any breastfeeding  
55 (33.0% exclusive). In contrast, parous women with no previous breastfeeding experience are least  
56 likely to start breastfeeding with a baseline of approximately 20%. In this group at 16 weeks only  
57 5.0% were continuing with any breastfeeding (3.9% exclusive).  
58

### 59 **Prediction of stopping breastfeeding**



1  
2  
3 This analysis considered only those who initiated breastfeeding (n = 233) and what factors  
4 predicted cessation. As in Figure 3 analyses were carried out for both exclusive breastfeeding and  
5 any breastfeeding. The final model was chosen using the AIC and the best fit model comprised the  
6 variables: Previous breastfeeding, Intention to breastfeed, Total IIFAS score and Major  
7 occupational group. Neither Age nor SIMD were included in the final model as these are strongly  
8 correlated with occupation and previous breastfeeding. Those women who initiated breastfeeding  
9 and had higher IIFAS scores were highly significantly less likely to stop breastfeeding whether  
10 'exclusive' or 'any' breastfeeding (Table 4). Those with higher intention scores had much greater  
11 duration than those with lower intention scores and were significantly associated with lower risk of  
12 stopping 'exclusive' or 'any' breastfeeding, with a 29% and 43% lower risk respectively.  
13 In the final model there was also a trend across the occupations with lower breastfeeding in the  
14 routine and manual occupations. Parity was not such a strong predictor once intentions and IOWA  
15 score were included. The two most significant predictors of not stopping (for both exclusive and  
16 any breastfeeding) were high intention score and high IIFAS score (Table 4). The c-statistics for  
17 both models were  $c = 0.649$  (95% CI 0.605 to 0.693) and  $c = 0.689$  (95% CI 0.641 to 0.875) for  
18 'exclusive' and 'any' breastfeeding respectively. In these models the IDI was highest for the IIFAS  
19 with IDI=0.077 for 'exclusive' and IDI=0.074 for 'any' breastfeeding respectively. In contrast,  
20 although a statistically significant predictor, the IDI was negligible for intentions from the TPB  
21 questionnaire.

## 22 Discussion

23  
24 As far as can be established this is the first study of infant feeding in the weeks following birth  
25 using antenatal data gathered prospectively in real time in a large cohort. In order to achieve this,  
26 a novel method of collecting data via SMS text messaging was successfully developed, validated  
27 and utilised. This data collection method was demonstrated to have excellent reliability and  
28 validity.<sup>24</sup>

29  
30 A sample with a broadly similar overall SIMD profile to pregnant women in Dundee in 2009 was  
31 recruited with good representation from deprived areas which is often a problem in studying  
32 breastfeeding. Excellent follow-up through each phase of the study was achieved, and the  
33 quantitative phase was complemented by a large amount of qualitative data gathered from a  
34 diverse sample of participants with a range of feeding experiences.<sup>25</sup>

35  
36 Our cohort's figures for breastfeeding are broadly consistent with national and local rates of  
37 breastfeeding. 68% of the sample started breastfeeding compared to local figures 59% (local  
38 maternity database, 2009). Over the 6 – 8 weeks period 29.1% – 33.9% were exclusively  
39 breastfeeding and 44.1% – 48.3% were offering some breast milk. In comparison, Dundee City  
40 figures were: exclusive = 23.3%, and any = 33.4%; while the exclusive breastfeeding figure at 6-8  
41 weeks for Scotland was 26.5%.<sup>27</sup> The generally higher rates at all time-points may be accounted  
42 for by the slightly higher numbers of women in our study from more affluent areas, while the  
43 national Infant Feeding Survey data is based on retrospective reports.<sup>7</sup> It is also possible that our  
44 figures are more accurate as they are based on prospective real-time texts from the women.  
45 Overall, the consistency with known official statistics lends added validity to our results.

46  
47 The mean score on the IIFAS (58.8, SD 9.36) was similar to that reported by de la Mora (1999)<sup>11</sup>  
48 The dichotomous nature of the 'Intentions' variable suggests that in the latter stages of pregnancy  
49 most women are clear about how they plan to feed their baby, with only a few being undecided. As  
50 in previous studies of breastfeeding using the TPB, intentions were explained by PBC, attitudes and  
51 the IOWA score with demographic variables accounting for less of the variance.<sup>11, 28,29</sup>

52  
53 The Kaplan-Meier plots show the expected pattern of breastfeeding cessation, with the steepest  
54 drop-off occurring in the first couple of weeks after birth in all women for exclusive breastfeeding.  
55 However, large differences in the duration of breastfeeding could be observed between groups. In  
56 particular parous women with no previous breastfeeding experience stopped very quickly after  
57 birth, while primiparous women showed a similar pattern of duration to those parous women who  
58 did have previous breastfeeding experience so prior experience of breastfeeding is a strong  
59 predictor. This is similar to the findings of the recent Scottish Infant Feeding Survey data from  
60 2010.<sup>7</sup>

1  
2  
3  
4  
5 In the prediction models, while demographic measures were important, the measures of intention  
6 (TPB) and attitude to breastfeeding (IIFAS score) were the strongest predictors of both initiation  
7 and stopping breastfeeding. However, intention was stronger for initiating breastfeeding, while  
8 attitude was stronger for persevering with breastfeeding. This has important clinical implications.  
9 We suggest that the current interpretation of the UNICEF Baby Friendly guidelines should be  
10 revisited. Our findings indicate that a discussion with women about their intentions, in combination  
11 with an exploration of their attitude to formula feeding and breastfeeding (perhaps through use of  
12 the IIFAS) could be a powerful way of identifying those women who might need more help and  
13 support with both initiating and persevering with breastfeeding. The findings also lend weight to  
14 the targeting of younger women and women from lower socioeconomic backgrounds both for extra  
15 encouragement to breastfeed and for additional breastfeeding support.

### 16 **Importance to NHS and possible implementation**

17  
18 Breastfeeding is known to have significant short and long-term health benefits for both mother and  
19 infant. Increasing the number of breastfed babies through targeted interventions has potential to  
20 prevent future ill-health, save the NHS money and is congruent with Government policy.<sup>30-32</sup> The  
21 findings of this study can be used both to identify women who need additional support and to  
22 inform the design of interventions to promote and support breastfeeding. Antenatal and public  
23 health interventions should aim to improve attitudes to breastfeeding generally and improve  
24 women's confidence in their ability to breastfeed. There is a need to target primigravidae during  
25 pregnancy and in the early postnatal days and weeks: as success with breastfeeding in the first  
26 pregnancy is likely to lead to more chance of feeding successfully in subsequent pregnancies.  
27 Parous women with no previous breastfeeding experience need the most support as they are most  
28 likely to give up quickly. The use of antenatal measures of intention and attitude to breastfeeding  
29 might be useful to identify women who are likely to need more support in the early days and weeks  
30 after delivery. Increased levels of support, perhaps from other women who have successfully  
31 breastfed might be an effective intervention strategy.

### 32 **Future research**

33  
34 This study has followed phase 1 of the MRC process, that is, collection of initial data and  
35 determining predictors of outcome.<sup>23</sup> The next stage will be to develop a complex interventions  
36 based on these findings both to improve rates of initiation of breastfeeding and to provide targeted  
37 support to those who commence breastfeeding. In addition, the discriminative ability for initiation  
38 was excellent but only moderate for stopping breastfeeding, while intention (TPB) was most  
39 important for initiating and attitude (IIFAS) most important for persevering with breastfeeding. This  
40 suggests there may be further factors in stopping that could be explored.

41  
42 This study demonstrated the benefits of SMS messaging to collect data and so can easily be used in  
43 other studies to collect similar data. In addition text messaging may have potential as a cost-  
44 effective and convenient way to provide health information and support messages as part of a  
45 complex intervention. These suggestions could apply to breastfeeding, as well as having  
46 application in many other health arenas.

### 47 **Conclusions**

48  
49 This landmark study used SMS text messaging to gather real-time data on infant feeding from birth  
50 to 16 weeks postnatal. It provides the most detailed and comprehensive data on the form and  
51 method of infant feeding. The results are consistent with Scottish national figures, hence enhancing  
52 the validity of our findings.

53  
54 The construct of 'Intentions' (from the TPB) and a measure of attitude to breastfeeding (the IIFAS  
55 score) have been shown to be important in predicting future infant feeding behaviour, as well as  
56 socioeconomic background. Primigravidae and parous women with no previous breastfeeding  
57 experience are likely to need the most support as these groups are least likely to commence  
58 breastfeeding, and most likely to stop early.

## Acknowledgements

We thank NHS Tayside colleagues: especially the Community Midwives in Dundee, Danke McLeod, who supplied the delivery and discharge data, Child Health for information about stillbirths and neonatal deaths, Massimo Brillante, software programmer in Health Informatics Centre (<http://medicine.dundee.ac.uk/hic>).

We also thank women who consented to take part and who generously gave their time.

**Contributors:** PTD designed the study, supervised the statistical analysis, drafted the final paper and approved the final version; JD designed the study, involved in design of collection tools, commented on drafts and approved the final version; AS designed the study, contributed to collection tools, commented on drafts and approved the final version; PR carried out the statistical analysis, contributed to drafts and approved the final version; EM-H involved in design of collection tools, collected data, commented on drafts and approved the final version; GK involved in design of collection tools, collected data, commented on drafts and approved the final version; JW designed the study, supervision of the data collection, commented on drafts and approved the final version; HMW designed the study, involved in design of data collection tools, supervised the study as PI, commented on drafts and approved the final version.

**Ethics approval:** The study was granted approval by the NHS Tayside Research Ethics Committee on 08.07.2009 under reference 09/S1402/28.

**Funding:** Financial support for the submitted work was based on a grant from the Chief Scientist Office of Scotland (CZH/4/568).

**Competing Interests:** All authors have completed the ICMJE uniform disclosure form at [www.icmje.org/coi\\_disclosure.pdf](http://www.icmje.org/coi_disclosure.pdf) and declare: Financial support for the submitted work was based on a grant from the Chief Scientist Office of Scotland (CZH/4/568). PTD has received research grants from Otsuka, GSK and Pfizer, provides statistical support to the Scottish Medicines Consortium, has received royalties for predictive algorithms from Arhidia Informatics; JCW has received book royalties from Springer publishing; no other relationships or activities that could appear to have influenced the submitted work.

**Data sharing:** No additional data are available.

The Corresponding Author has the right to grant on behalf of all authors and does grant on behalf of all authors, [a worldwide licence](#) to the Publishers and its licensees in perpetuity, in all forms, formats and media (whether known now or created in the future), to i) publish, reproduce, distribute, display and store the Contribution, ii) translate the Contribution into other languages, create adaptations, reprints, include within collections and create summaries, extracts and/or, abstracts of the Contribution, iii) create any other derivative work(s) based on the Contribution, iv) to exploit all subsidiary rights in the Contribution, v) the inclusion of electronic links from the Contribution to third party material where-ever it may be located; and, vi) licence any third party to do any or all of the above."

## References

1. Howie P, Forsyth J, Ogston S, Clark A, du V Florey C. Protective effect of breastfeeding against infection. *BMJ*. 1990; 300: 11 – 16.
2. Kramer MS, Kakuma R. Optimal duration of exclusive breastfeeding. *Cochrane Database of Systematic Reviews* 2002, Issue 1. Art. No.: CD003517. DOI: 10.1002/14651858.CD003517.
3. Ip S, Chung M, Raman G, Chew P, Magula N, DeVine D. Breastfeeding and Maternal and Infant Health Outcomes in Developed Countries [Agency for Healthcare Research and Quality \(US\) Evidence Reports/Technology Assessments, 2007, No. 153](#) (<http://www.ncbi.nlm.nih.gov/books/NBK38337/>)

- 1
- 2
- 3 4. Duijts L, Ramadhani M, Moll H. Breastfeeding protects against infectious diseases during
- 4 infancy in industrialized countries. A systematic review. *Maternal and Child Nutrition*. 2009;
- 5 5: 199 – 210.
- 6 5. World Health Organisation, 2011a. Exclusive breastfeeding for six months best for babies
- 7 everywhere.
- 8 ([http://www.who.int/mediacentre/news/statements/2011/breastfeeding\\_20110115/en/index.html](http://www.who.int/mediacentre/news/statements/2011/breastfeeding_20110115/en/index.html))
- 9
- 10 6. World Health Organisation, 2011b. WHO Global Health Indicators 2011.
- 11 ([http://www.who.int/gho/publications/world\\_health\\_statistics/EN\\_WHS2011\\_Part2.pdf](http://www.who.int/gho/publications/world_health_statistics/EN_WHS2011_Part2.pdf))
- 12
- 13 7. Health and Social Care Information Centre (HSCIC) (2012) Infant Feeding Survey 2010.
- 14 Health and Social Care Information Centre, IFF Research
- 15 (<http://www.ic.nhs.uk/pubs/infantfeeding10final>) (accessed 23.11.12)
- 16 8. The Scottish Government 2007. Better Health, Better Care. The Scottish Government:
- 17 Edinburgh
- 18 9. ISD Scotland 2011, Breastfeeding Statistics. Information and Statistics Division
- 19 (<http://www.isdscotland.org/Health-Topics/Child-Health/Publications/2011-10-25/2011-10-25-Breastfeeding-Summary.pdf?40969485045>) (accessed 17.5.12)
- 20 10. McInnes R, Love J, Stone D. Independent predictors of breastfeeding intention in a
- 21 disadvantaged population of pregnant women. *BMC Public Health* 2001; 1: 10.
- 22 (<http://www.biomedcentral.com/1471-2458/1/10>)
- 23 11. de La Mora A, Russell D, Dungy C, Losch M, Dusdieker L. The Iowa Infant Feeding Attitude
- 24 Scale: analysis of reliability and validity. *Journal of Applied Social Psychology* 1999; 29:
- 25 2362 – 2380.
- 26 12. Scott J, Binns C, Oddy W, Graham K. Predictors of breastfeeding duration: evidence from a
- 27 cohort study. *Pediatrics* 2006; 117: e646 – e655.
- 28 13. Scott J, Shaker I, Reid M. Parental attitudes toward breastfeeding: their association with
- 29 feeding outcome at hospital discharge. *Birth*. 2004; 31: 125 – 131.
- 30 14. Dungy C, McInnes R, Tappin D, Wallis A, Oprescu F. Infant feeding attitudes and knowledge
- 31 among socioeconomically disadvantaged women in Glasgow. *Maternal Child Health Journal*.
- 32 2008; 12: 313 – 322.
- 33 15. Sittlington J, Stewart-Knox B, Wright M, Bradbury I, Scott J. Infant-feeding attitudes of
- 34 expectant mothers in Northern Ireland. *Health Education Research*. 2007; 22(4): 561 – 570.
- 35 16. Wallis AB, Brinzaniuc A, Chereches R, Oprescu F, Sirlincan E, David I, et al. Reliability and
- 36 validity of the Romanian version of a scale to measure infant feeding attitudes and
- 37 knowledge. *Acta Paediatrica*. 2008; 97: 1194 – 1199.
- 38 17. UNICEF (nd) Baby Friendly Initiative <http://www.unicef.org.uk/BabyFriendly/>
- 39 18. Beake S, Brinzaniuc A, Chereches R, Oprescu F, Sirlincan E, David I. A systematic review of
- 40 structured compared with non-structured breastfeeding programmes to support the
- 41 initiation and duration of exclusive and any breastfeeding in acute and primary health care
- 42 settings. *Maternal and Child Nutrition*. 2012; 8: 141 – 161.
- 43 19. Kramer M, Chalmers B, Hodnett E, Sevkovskaya Z, Dzikovich I, Shapiro S, et al. Promotion
- 44 of breastfeeding intervention trial (PROBIT). A randomized trial in the Republic of Belarus.
- 45 *JAMA*; 2001; 285: 413-420.
- 46 20. Tappin DM, Mackenzie J, Brown A, Girdwood R, Britten J, Broadfoot M, et al. Breastfeeding
- 47 rates are increasing in Scotland. *Health Bulletin* 2001; 59(2): 102-107.
- 48 21. UNICEF 2011. How to implement baby friendly standards: A guide for maternity settings
- 49 UNICEF UK Baby Friendly Initiative, London.
- 50 ([http://www.unicef.org.uk/Documents/Baby\\_Friendly/Guidance/Implementation%20Guidance/Implementation\\_guidance\\_maternity\\_web.pdf](http://www.unicef.org.uk/Documents/Baby_Friendly/Guidance/Implementation%20Guidance/Implementation_guidance_maternity_web.pdf))
- 51 22. Ajzen, I. The Theory of Planned Behavior. *Organizational Behavior and Human Decision*
- 52 *Processes* 1991; 50: 179 - 211.
- 53 23. Campbell NC, Murray E, Darbyshire J, Emery J, Farmer A, Griffiths F, et al. 2007. Designing
- 54 and evaluating complex interventions to improve health care. *BMJ* 2007; 334: 455 – 459.
- 55 24. Whitford H, Donnan P, Symon A, Kellett G, Monteith-Hodge E, Rauchhaus P, et al.
- 56 Evaluating the reliability, validity, acceptability and practicality of SMS text messaging as a
- 57 tool to collect research data: results from the Feeding Your Baby project. *Journal of the*
- 58 *American Medical Informatics Association*. amiajnl-2011-000785 Published Online First: 26
- 59 April 2012
- 60

- 1  
2  
3 25. Symon AG, Whitford H, Dalzell J. Infant feeding in Eastern Scotland: A longitudinal mixed  
4 methods evaluation of antenatal intentions and postnatal satisfaction —The Feeding Your  
5 Baby study. *Midwifery* 2012, <http://dx.doi.org/10.1016/j.midw.2012.06.017>  
6 26. Pencina MJ, D'Agostino RB Sr, D'Agostino RB Jr. Evaluating the predictive ability of a new  
7 marker: From area under the ROC curve to reclassification and beyond. *Stat Med* 2008; 27:  
8 157-72.  
9 27. ISD Scotland 2011, Breastfeeding Statistics. Information and Statistics Division  
10 [http://www.isdscotland.org/Health-Topics/Child-Health/Publications/2011-10-25/2011-10-](http://www.isdscotland.org/Health-Topics/Child-Health/Publications/2011-10-25/2011-10-25-Breastfeeding-Summary.pdf?40969485045)  
11 [25-Breastfeeding-Summary.pdf?40969485045](http://www.isdscotland.org/Health-Topics/Child-Health/Publications/2011-10-25/2011-10-25-Breastfeeding-Summary.pdf?40969485045) (accessed 17.5.12)  
12 28. McMillan B, Conner M, Woolridge M, Dyson L, Green J, Renfrew M, et al. Predicting  
13 breastfeeding in women living in areas of economic hardship: explanatory role of the theory  
14 of planned behaviour. *Psychology and Health*. 2008; 23(7): 767 – 788.  
15 29. Blyth R, Creedy D, Dennis, C, Moyle W, Pratt J, De Vries S. Effect of maternal confidence on  
16 breastfeeding duration: an application of the breastfeeding self-efficacy theory. *Birth* 2002;  
17 29: 278 – 284  
18 30. The Scottish Government. 2011a. A Refreshed Framework for Maternity Care in Scotland.  
19 The Maternity Services Action Group. Edinburgh: The Scottish Government  
20 31. The Scottish Government. 2011b. Reducing Antenatal Health Inequalities. Outcome  
21 Focused Evidence into Action Guidance. Edinburgh: The Scottish Government  
22 32. Renfrew M, Pokhrel S, Quigley M, McCormick F, Fox-Rushby J, Dodds R, et al. Preventing  
23 disease and saving resources: the potential contribution of increasing breastfeeding rates in  
24 the UK. UNICEF, UK, 2012.  
25 [http://www.unicef.org.uk/Documents/Baby\\_Friendly/Research/Preventing\\_disease\\_saving\\_r](http://www.unicef.org.uk/Documents/Baby_Friendly/Research/Preventing_disease_saving_r)  
26 [esources.pdf](http://www.unicef.org.uk/Documents/Baby_Friendly/Research/Preventing_disease_saving_r) (accessed 17.5.12)  
27  
28  
29  
30  
31  
32  
33  
34  
35  
36  
37  
38  
39  
40  
41  
42  
43  
44  
45  
46  
47  
48  
49  
50  
51  
52  
53  
54  
55  
56  
57  
58  
59  
60

1  
2  
3  
4  
5  
6  
7  
8  
9  
10  
11  
12  
13  
14  
15  
16  
17  
18  
19  
20  
21  
22  
23  
24  
25  
26  
27  
28  
29  
30  
31  
32  
33  
34  
35  
36  
37  
38  
39  
40  
41  
42  
43  
44  
45  
46  
47  
48  
49  
50  
51  
52  
53  
54  
55  
56  
57  
58  
59  
60

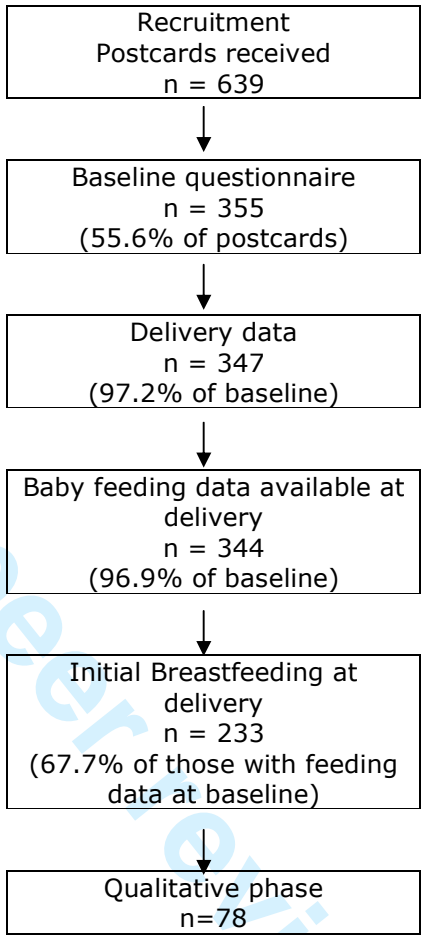

Figure 1: Flow chart of participant recruitment

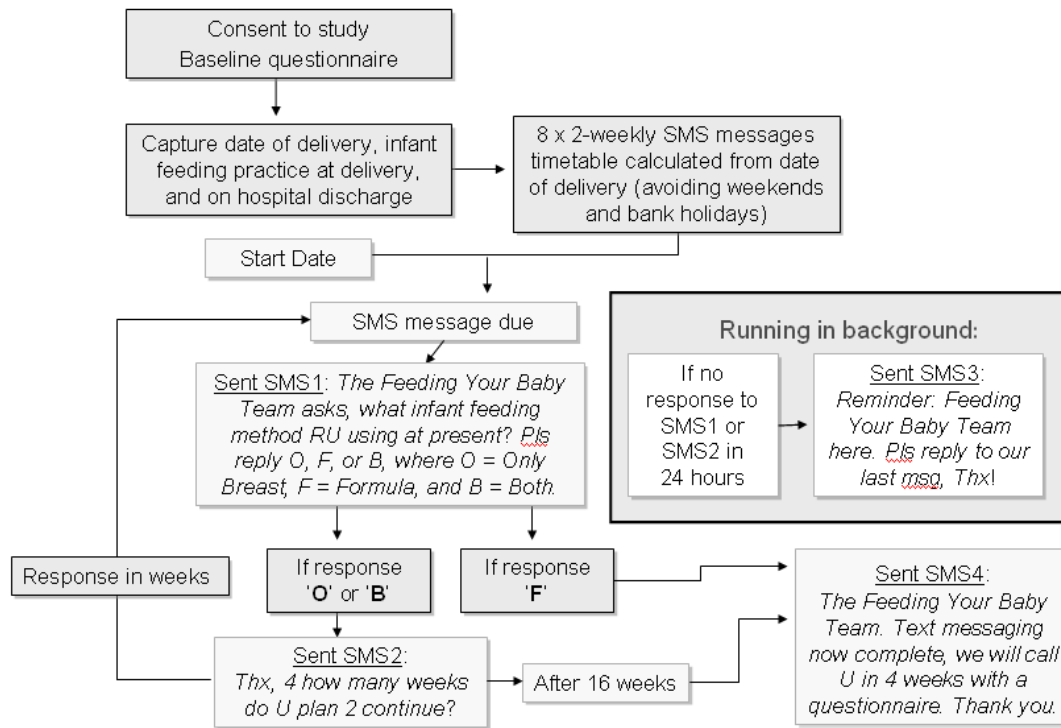

Figure 2: Schedule of SMS messages

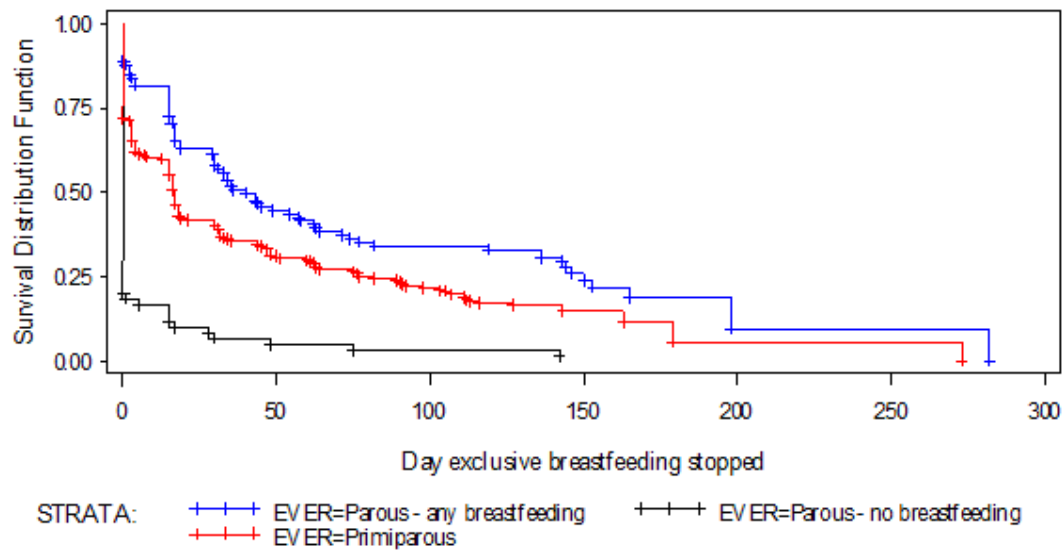

Figure 3a: Time to end of exclusive breastfeeding (WHO) in all women

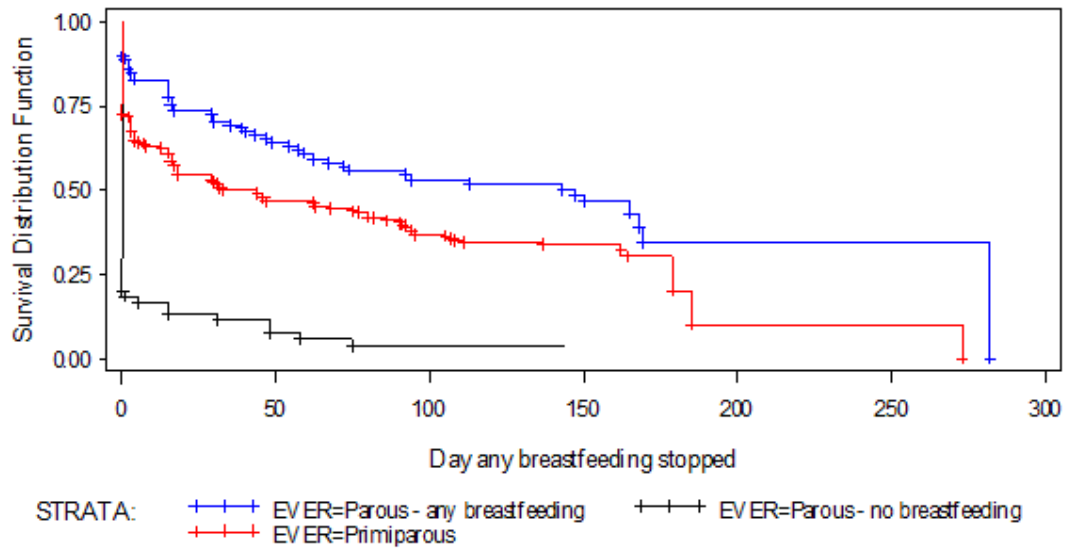

Figure 3b: Time to end of any breastfeeding in all women



**Table 1: Characteristics of Women by feeding method at Baseline delivery (n = 344)**

|                                                                   | Women who did not<br>initiate breastfeeding (n<br>= 111)<br>*Mean (SD) or<br>**% (N) | Women who initiated<br>breastfeeding (n = 233)<br>Mean (SD) or % (N) |
|-------------------------------------------------------------------|--------------------------------------------------------------------------------------|----------------------------------------------------------------------|
| Gestation at baseline (weeks)*                                    | 32.5 (5.28)                                                                          | 31.7 (5.91)                                                          |
| Age (years)*                                                      | 26.6 (6.21)                                                                          | 29.6 (5.42)                                                          |
| Years since leaving school*                                       | 15.9 (2.83)                                                                          | 17.9 (1.83)                                                          |
| Relationship status**                                             |                                                                                      |                                                                      |
| Single                                                            | 22.5 (25)                                                                            | 5.2 ( 12)                                                            |
| Married                                                           | 29.7 (33)                                                                            | 55.8 (130)                                                           |
| With partner                                                      | 46.8 (52)                                                                            | 38.6 ( 90)                                                           |
| Other                                                             | 0.0 ( 0)                                                                             | 0.4 ( 1)                                                             |
| Missing                                                           | 0.9 ( 1)                                                                             | 0.0 ( 0)                                                             |
| Living status**                                                   |                                                                                      |                                                                      |
| On own                                                            | 17.1 (19)                                                                            | 2.6 ( 6)                                                             |
| With husband or partner                                           | 58.6 (65)                                                                            | 89.3 (208)                                                           |
| With parents                                                      | 15.3 (17)                                                                            | 5.2 ( 12)                                                            |
| Other                                                             | 6.3 ( 7)                                                                             | 1.3 ( 3)                                                             |
| Missing                                                           | 2.7 ( 3)                                                                             | 1.7 ( 4)                                                             |
| Parity**                                                          |                                                                                      |                                                                      |
| First child                                                       | 45.0 (50)                                                                            | 54.5 (127)                                                           |
| Second child                                                      | 30.6 (34)                                                                            | 29.2 ( 68)                                                           |
| Third child or more                                               | 21.6 (24)                                                                            | 12.5 ( 29)                                                           |
| Missing                                                           | 2.7 ( 3)                                                                             | 3.9 ( 9)                                                             |
| Previous breastfeeding experience                                 |                                                                                      |                                                                      |
| Primiparous                                                       | 47.7 (53)                                                                            | 58.4 (136)                                                           |
| Parous – no previous<br>breastfeeding experience                  | 43.2 (48)                                                                            | 5.2 (12)                                                             |
| Parous – previous breastfeeding<br>experience                     | 9.0 (10)                                                                             | 36.5 (85)                                                            |
| Missing                                                           | 0.0 ( 0)                                                                             | 0.0 ( 0)                                                             |
| SIMD Quintile**                                                   |                                                                                      |                                                                      |
| Quintile 1 (most deprived)                                        | 47.7 (53)                                                                            | 30.5 (71)                                                            |
| Quintile 2                                                        | 20.7 (23)                                                                            | 10.3 (24)                                                            |
| Quintile 3                                                        | 8.1 ( 9)                                                                             | 12.4 (29)                                                            |
| Quintile 4                                                        | 15.3 (17)                                                                            | 30.9 (72)                                                            |
| Quintile 5 (most affluent)                                        | 7.2 ( 8)                                                                             | 15.9 (37)                                                            |
| Missing                                                           | 0.9 ( 1)                                                                             | 0.0 ( 0)                                                             |
| Occupations**                                                     |                                                                                      |                                                                      |
| Higher managerial, administrative<br>and professional occupations | 24.3 (27)                                                                            | 60.1 (140)                                                           |
| Intermediate occupations                                          | 16.2 (18)                                                                            | 12.0 ( 28)                                                           |
| Routine and manual occupations                                    | 18.9 (21)                                                                            | 11.6 ( 27)                                                           |
| Not in paid employment                                            | 34.2 (38)                                                                            | 15.5 ( 36)                                                           |
| Missing                                                           | 6.3 ( 7)                                                                             | 0.9 ( 2)                                                             |
| Total IIFAS score                                                 | 49.8 (6.29)                                                                          | 62.8 (7.46)                                                          |

|                                                                  | Women who did not<br>initiate breastfeeding (n<br>= 111)<br>*Mean (SD) or<br>**% (N) | Women who initiated<br>breastfeeding (n = 233)<br>Mean (SD) or % (N) |
|------------------------------------------------------------------|--------------------------------------------------------------------------------------|----------------------------------------------------------------------|
| TPB score 1: Attitude to<br>breastfeeding                        | 2.6 (0.76)                                                                           | 4.2 (0.68)                                                           |
| TPB score 2: Subjective norm                                     | 2.2 (0.3)                                                                            | 3.3 (1.0)                                                            |
| TPB score 3: Perceived behavioural<br>control                    | 2.6 (0.84)                                                                           | 3.8 (0.76)                                                           |
| TPB score 4: Intention to breastfeed                             | 1.7 (0.96)                                                                           | 4.4 (0.96)                                                           |
| TPB score 4: Intention to breastfeed<br>categorical (% (number)) |                                                                                      |                                                                      |
| No breastfeeding intended                                        | 60.4 (67)                                                                            | 3.0 ( 7)                                                             |
| Undecided                                                        | 38.7 (43)                                                                            | 45.1 (105)                                                           |
| Definite breastfeeding intended                                  | 0.0 ( 0)                                                                             | 51.9 (121)                                                           |
| Missing                                                          | 0.9 ( 1)                                                                             | 0.0 ( 0)                                                             |

Table 2 Results of Multiple Logistic Regression of factors associated with initiating breast feeding (n = 344)

| Variable                                  | OR (95% CI)              | Chi Squared | p-value |
|-------------------------------------------|--------------------------|-------------|---------|
| Age (years)                               | 1.114 [1.003 to 1.237]   | 4.077       | 0.044   |
| <b>Parity</b>                             |                          |             |         |
| Parous - no breastfeeding vs Primiparous  | 0.212 [0.052 to 0.863]   | 7.798       | 0.005   |
| Parous - any breastfeeding vs Primiparous | 2.015 [0.547 to 7.426]   | 5.294       | 0.021   |
| TPB score 4: Intention to breastfeed      | 4.668 [2.909 to 7.491]   | 40.759      | <.0001  |
| Total IIFAS Score                         | 1.173 [1.058 to 1.300]   | 9.238       | 0.002   |
| <b>Living Status</b>                      |                          |             |         |
| With husband or partner vs On own         | 13.862 [2.241 to 85.722] | 10.806      | 0.001   |
| With parents vs On own                    | 3.545 [0.379 to 33.171]  | 0.381       | 0.537   |
| Other vs On own                           | 0.554 [0.021 to 14.686]  | 1.542       | 0.214   |

review only

**Table 3: Predicted breastfeeding rates at different timepoints according to parity and any breastfeeding of previous children (from SMS data n = 344)**

|                                                    | Time           | Exclusive Breastfeeding<br>% | CI             | Any Breastfeeding<br>% | CI             |
|----------------------------------------------------|----------------|------------------------------|----------------|------------------------|----------------|
| All                                                | Baseline       | 67.6                         | [0.62 to 0.72] | 68.2                   | [0.63 to 0.73] |
|                                                    | 6 weeks        | 33.9                         | [0.29 to 0.39] | 48.3                   | [0.43 to 0.53] |
|                                                    | 8 weeks        | 29.1                         | [0.24 to 0.34] | 44.1                   | [0.39 to 0.49] |
|                                                    | 16 weeks       | 20.4                         | [0.16 to 0.25] | 34.5                   | [0.29 to 0.40] |
|                                                    | Exit Interview | 3.3                          | [0.00 to 0.12] | 8.5                    | [0.01 to 0.27] |
| Primiparous                                        | Baseline       | 71.7                         | [0.65 to 0.78] | 72.3                   | [0.65 to 0.78] |
|                                                    | 6 weeks        | 34.3                         | [0.28 to 0.41] | 50.1                   | [0.43 to 0.57] |
|                                                    | 8 weeks        | 29.3                         | [0.23 to 0.36] | 46.7                   | [0.39 to 0.54] |
|                                                    | 16 weeks       | 18.8                         | [0.14 to 0.25] | 34.5                   | [0.28 to 0.41] |
|                                                    | Exit Interview | 5.8                          | [0.01 to 0.18] | 10.1                   | [0.01 to 0.32] |
| Parous - no previous<br>breastfeeding              | Baseline       | 20.0                         | [0.11 to 0.31] | 18.3                   | [0.10 to 0.29] |
|                                                    | 6 weeks        | 5.0                          | [0.01 to 0.13] | 11.7                   | [0.05 to 0.21] |
|                                                    | 8 weeks        | 5.0                          | [0.01 to 0.13] | 5.8                    | [0.02 to 0.14] |
|                                                    | 16 weeks       | 3.9                          | [0.01 to 0.13] | 5.0                    | [0.01 to 0.12] |
|                                                    | Exit Interview | 1.7                          | [0.00 to 0.08] | 3.9                    | [0.01 to 0.12] |
| Parous - with previous<br>breastfeeding experience | Baseline       | 88.8                         | [0.81 to 0.94] | 89.8                   | [0.82 to 0.94] |
|                                                    | 6 weeks        | 46.6                         | [0.36 to 0.56] | 67.2                   | [0.57 to 0.76] |
|                                                    | 8 weeks        | 41.4                         | [0.32 to 0.51] | 62.0                   | [0.52 to 0.71] |
|                                                    | 16 weeks       | 33.0                         | [0.24 to 0.42] | 52.6                   | [0.42 to 0.62] |
|                                                    | Exit Interview | 9.3                          | [0.01 to 0.28] | 34.6                   | [0.21 to 0.49] |

Peer review only

**Table 4a: Final model using Cox Regression to predict stopping 'Exclusive' breastfeeding (n = 233)**

| Variable                                                       | Hazard Ratio | CI             | p-value |
|----------------------------------------------------------------|--------------|----------------|---------|
| Parous - any breastfeeding                                     | 0.873        | [0.63 to 1.21] | 0.4103  |
| Parous - no breastfeeding                                      | 0.809        | [0.41 to 1.58] | 0.5367  |
| Primiparous                                                    | 1.000        |                |         |
| Higher managerial, administrative and professional occupations | 0.726        | [0.46 to 1.15] | 0.1716  |
| Intermediate occupations                                       | 0.789        | [0.44 to 1.41] | 0.4246  |
| Routine and manual occupations                                 | 0.880        | [0.50 to 1.56] | 0.6601  |
| Not in paid employment                                         | 1.000        |                |         |
| TPB score 4: Intention to breastfeed (High vs low)             | 0.715        | [0.53 to 0.97] | 0.0317  |
| Total IIFAS Score (+ 10 units)                                 | 0.553        | [0.43 to 0.71] | <.0001  |

**Table 4b: Final model using Cox Regression to predict stopping 'Any' breastfeeding (n=233)**

| Variable                                                       | Hazard Ratio | CI             | p-value |
|----------------------------------------------------------------|--------------|----------------|---------|
| Parous - any breastfeeding                                     | 0.829        | [0.56 to 1.22] | 0.3426  |
| Parous - no breastfeeding                                      | 1.079        | [0.51 to 2.26] | 0.8403  |
| Primiparous                                                    | 1.000        |                |         |
| Higher managerial, administrative and professional occupations | 0.602        | [0.37 to 0.99] | 0.0457  |
| Intermediate occupations                                       | 0.622        | [0.32 to 1.21] | 0.1619  |
| Routine and manual occupations                                 | 0.714        | [0.37 to 1.39] | 0.3215  |
| Not in paid employment                                         | 1.000        |                |         |
| TPB score 4: Intention to breastfeed (High vs Low)             | 0.569        | [0.39 to 0.82] | 0.0026  |
| Total IIFAS Score (+ 10 units)                                 | 0.549        | [0.41 to 0.74] | <.0001  |

## Appendix 1

### Logistic model for prediction of initiation of breastfeeding

The probability of initiating breastfeeding can be derived from the model in Table 2, where:  
 $\text{Prob} = 1 / ( 1 + \exp (-\beta x) )$ .

Estimate the linear predictor  $\beta x =$   
 -17.1114  
 + 0.1078 x age  
 -1.2663 x Ever (Parous-no breastfeeding=1)  
 + 0.9835 x Ever (Parous - any breastfeeding=1)  
 + 1.8032 x Living (with husband or partner=1)  
 + 0.4395 x Living (with parents=1)  
 -1.4168 x Living (with other=1)  
 + 0.1597 x IIFAS  
 + 1.5407 x Intentions

Calculate  $\exp (-\beta x)$ ,  
 Then  $\text{Prob.} = 1 / ( 1 + \exp (-\beta x) )$

| Final Model: Initiation of Breastfeeding |                            |    |          |                |                 |         |
|------------------------------------------|----------------------------|----|----------|----------------|-----------------|---------|
| Parameter                                |                            | DF | Estimate | Standard Error | Wald Chi-Square | p-value |
| Intercept                                |                            | 1  | -17.1114 | 3.4021         | 25.2967         | <0.0001 |
| Age                                      |                            | 1  | 0.1078   | 0.0534         | 4.0770          | 0.0435  |
| Parity                                   | Parous - no breastfeeding  | 1  | -1.2663  | 0.4535         | 7.7977          | 0.0052  |
|                                          | Parous - any breastfeeding | 1  | 0.9835   | 0.4274         | 5.2943          | 0.0214  |
| Living                                   | With husband or partner    | 1  | 1.8032   | 0.5485         | 10.8058         | 0.0010  |
|                                          | With parents               | 1  | 0.4395   | 0.7121         | 0.3809          | 0.5371  |
|                                          | Other                      | 1  | -1.4168  | 1.1411         | 1.5417          | 0.2144  |
| IIFAS                                    |                            | 1  | 0.1597   | 0.0525         | 9.2383          | 0.0024  |
| Intentions                               |                            | 1  | 1.5407   | 0.2413         | 40.7592         | <0.0001 |

Derivation of points from the final model (n=344) for clinical use. Each question is based on the factors in the prediction model; Intentions (TPB), IIFAS score, living arrangements, parity and age. ( $B^* = 0.1078$ )

| Variable                   | B        | $\beta (W_{ij} - W_{iREF})$ | Points = $\beta (W_{ij} - W_{iREF}) / B^*$ |
|----------------------------|----------|-----------------------------|--------------------------------------------|
| Intercept                  | -17.1114 |                             | -159                                       |
| Intentions (TPB) +1        | 1.5407   |                             | 14                                         |
| IIFAS score +1             | 0.1597   |                             | 1.5                                        |
| Age +1 year                | 0.1078   |                             | 1                                          |
| Parous - no breastfeeding  | -1.2663  | -1.2663                     | -12                                        |
| Parous - any breastfeeding | 0.9835   | 0.9835                      | 9                                          |
| Primiparous                | 0        | 0                           | 0                                          |

|   |                                       |                |                |            |
|---|---------------------------------------|----------------|----------------|------------|
| 1 |                                       |                |                |            |
| 2 |                                       |                |                |            |
| 3 |                                       |                |                |            |
| 4 | <b>Living with husband or partner</b> | <b>1.8032</b>  | <b>1.8032</b>  | <b>17</b>  |
| 5 | <b>Living with parents</b>            | <b>0.4395</b>  | <b>0.4395</b>  | <b>4</b>   |
| 6 | <b>Living with Other</b>              | <b>-1.4168</b> | <b>-1.4168</b> | <b>-13</b> |
| 7 | <b>On own</b>                         | <b>0</b>       | <b>0</b>       | <b>0</b>   |
| 8 |                                       |                |                |            |
| 9 |                                       |                |                |            |

10 \*Sullivan LM, Massaro JM, D'Agostino RB Sr. Presentation of multivariate data for clinical use: The Framingham Study risk  
11 score function Statist Med 2004; 23: 1631-1660.

12  
13  
14  
15  
16  
17  
18  
19  
20  
21  
22  
23  
24  
25  
26  
27  
28  
29  
30  
31  
32  
33  
34  
35  
36  
37  
38  
39  
40  
41  
42  
43  
44  
45  
46  
47  
48  
49  
50  
51  
52  
53  
54  
55  
56  
57  
58  
59  
60

For peer review only

STROBE Statement—Checklist of items that should be included in reports of *cohort studies*

|                              | Item No | Recommendation                                                                                                                                                                                                                                                                                                                                                             |
|------------------------------|---------|----------------------------------------------------------------------------------------------------------------------------------------------------------------------------------------------------------------------------------------------------------------------------------------------------------------------------------------------------------------------------|
| <b>Title and abstract</b>    | 1       | (a) Indicate the study's design with a commonly used term in the title or the abstract <b>YES</b><br>(b) Provide in the abstract an informative and balanced summary of what was done and what was found <b>YES</b>                                                                                                                                                        |
| <b>Introduction</b>          |         |                                                                                                                                                                                                                                                                                                                                                                            |
| Background/rationale         | 2       | Explain the scientific background and rationale for the investigation being reported <b>YES</b>                                                                                                                                                                                                                                                                            |
| Objectives                   | 3       | State specific objectives, including any prespecified hypotheses <b>YES</b>                                                                                                                                                                                                                                                                                                |
| <b>Methods</b>               |         |                                                                                                                                                                                                                                                                                                                                                                            |
| Study design                 | 4       | Present key elements of study design early in the paper <b>YES</b>                                                                                                                                                                                                                                                                                                         |
| Setting                      | 5       | Describe the setting, locations, and relevant dates, including periods of recruitment, exposure, follow-up, and data collection <b>YES</b>                                                                                                                                                                                                                                 |
| Participants                 | 6       | (a) Give the eligibility criteria, and the sources and methods of selection of participants. Describe methods of follow-up <b>YES</b><br>(b) For matched studies, give matching criteria and number of exposed and unexposed <b>NA</b>                                                                                                                                     |
| Variables                    | 7       | Clearly define all outcomes, exposures, predictors, potential confounders, and effect modifiers. Give diagnostic criteria, if applicable <b>YES</b>                                                                                                                                                                                                                        |
| Data sources/<br>measurement | 8*      | For each variable of interest, give sources of data and details of methods of assessment (measurement). Describe comparability of assessment methods if there is more than one group <b>YES</b>                                                                                                                                                                            |
| Bias                         | 9       | Describe any efforts to address potential sources of bias <b>YES</b>                                                                                                                                                                                                                                                                                                       |
| Study size                   | 10      | Explain how the study size was arrived at <b>YES</b>                                                                                                                                                                                                                                                                                                                       |
| Quantitative variables       | 11      | Explain how quantitative variables were handled in the analyses. If applicable, describe which groupings were chosen and why <b>YES</b>                                                                                                                                                                                                                                    |
| Statistical methods          | 12      | (a) Describe all statistical methods, including those used to control for confounding <b>YES</b><br>(b) Describe any methods used to examine subgroups and interactions <b>YES</b><br>(c) Explain how missing data were addressed <b>NA</b><br>(d) If applicable, explain how loss to follow-up was addressed <b>NA</b><br>(e) Describe any sensitivity analyses <b>NA</b> |
| <b>Results</b>               |         |                                                                                                                                                                                                                                                                                                                                                                            |
| Participants                 | 13*     | (a) Report numbers of individuals at each stage of study—eg numbers potentially eligible, examined for eligibility, confirmed eligible, included in the study, completing follow-up, and analysed <b>YES</b><br>(b) Give reasons for non-participation at each stage <b>YES</b><br>(c) Consider use of a flow diagram <b>Yes</b>                                           |
| Descriptive data             | 14*     | (a) Give characteristics of study participants (eg demographic, clinical, social) and information on exposures and potential confounders <b>YES</b><br>(b) Indicate number of participants with missing data for each variable of interest <b>NA</b><br>(c) Summarise follow-up time (eg, average and total amount) <b>YES</b>                                             |
| Outcome data                 | 15*     | Report numbers of outcome events or summary measures over time <b>YES</b>                                                                                                                                                                                                                                                                                                  |
| Main results                 | 16      | (a) Give unadjusted estimates and, if applicable, confounder-adjusted estimates and their precision (eg, 95% confidence interval). Make clear which confounders were                                                                                                                                                                                                       |



|                          |    |                                                                                                                                                                                       |
|--------------------------|----|---------------------------------------------------------------------------------------------------------------------------------------------------------------------------------------|
|                          |    | adjusted for and why they were included <b>YES</b>                                                                                                                                    |
|                          |    | (b) Report category boundaries when continuous variables were categorized <b>YES</b>                                                                                                  |
|                          |    | (c) If relevant, consider translating estimates of relative risk into absolute risk for a meaningful time period <b>YES</b>                                                           |
| Other analyses           | 17 | Report other analyses done—eg analyses of subgroups and interactions, and sensitivity analyses <b>YES</b>                                                                             |
| <b>Discussion</b>        |    |                                                                                                                                                                                       |
| Key results              | 18 | Summarise key results with reference to study objectives <b>YES</b>                                                                                                                   |
| Limitations              | 19 | Discuss limitations of the study, taking into account sources of potential bias or imprecision. Discuss both direction and magnitude of any potential bias <b>YES</b>                 |
| Interpretation           | 20 | Give a cautious overall interpretation of results considering objectives, limitations, multiplicity of analyses, results from similar studies, and other relevant evidence <b>YES</b> |
| Generalisability         | 21 | Discuss the generalisability (external validity) of the study results <b>YES</b>                                                                                                      |
| <b>Other information</b> |    |                                                                                                                                                                                       |
| Funding                  | 22 | Give the source of funding and the role of the funders for the present study and, if applicable, for the original study on which the present article is based <b>YES</b>              |

\*Give information separately for exposed and unexposed groups.

**Note:** An Explanation and Elaboration article discusses each checklist item and gives methodological background and published examples of transparent reporting. The STROBE checklist is best used in conjunction with this article (freely available on the Web sites of PLoS Medicine at <http://www.plosmedicine.org/>, Annals of Internal Medicine at <http://www.annals.org/>, and Epidemiology at <http://www.epidem.com/>). Information on the STROBE Initiative is available at <http://www.strobe-statement.org>.



**Prediction of initiation and cessation of breast feeding from late pregnancy to 16 weeks: The Feeding Your Baby (FYB) cohort study**

|                                 |                                                                                                                                                                                                                                                                                                                                                                                                                                                                                                                                                                                                                    |
|---------------------------------|--------------------------------------------------------------------------------------------------------------------------------------------------------------------------------------------------------------------------------------------------------------------------------------------------------------------------------------------------------------------------------------------------------------------------------------------------------------------------------------------------------------------------------------------------------------------------------------------------------------------|
| Journal:                        | <i>BMJ Open</i>                                                                                                                                                                                                                                                                                                                                                                                                                                                                                                                                                                                                    |
| Manuscript ID:                  | bmjopen-2013-003274.R1                                                                                                                                                                                                                                                                                                                                                                                                                                                                                                                                                                                             |
| Article Type:                   | Research                                                                                                                                                                                                                                                                                                                                                                                                                                                                                                                                                                                                           |
| Date Submitted by the Author:   | 26-Jun-2013                                                                                                                                                                                                                                                                                                                                                                                                                                                                                                                                                                                                        |
| Complete List of Authors:       | Donnan, Peter; University of Dundee, Population Health Sciences<br>Dalzell, Janet; NHS, Directorate of Public Health<br>Symon, Andrew; University of Dundee, School of Nursing and Midwifery<br>Rauchhaus, Petra; University of Dundee, Dundee Epidemiology and Biostatistics Unit<br>Monteith-Hodge, Ewa; University of Dundee, School of Nursing and Midwifery<br>Kellett, Gillian; University of Dundee, School of Nursing and Midwifery<br>Wyatt, Jeremy; Leeds University Medical School, Yorkshire Centre for Health Informatics<br>Whitford, Heather; University of Dundee, School of Nursing and Midwifery |
| <b>Primary Subject Heading</b>: | Public health                                                                                                                                                                                                                                                                                                                                                                                                                                                                                                                                                                                                      |
| Secondary Subject Heading:      | Nutrition and metabolism, Health informatics, Paediatrics                                                                                                                                                                                                                                                                                                                                                                                                                                                                                                                                                          |
| Keywords:                       | Health informatics < BIOTECHNOLOGY & BIOINFORMATICS, PUBLIC HEALTH, Community child health < PAEDIATRICS, NUTRITION & DIETETICS                                                                                                                                                                                                                                                                                                                                                                                                                                                                                    |
|                                 |                                                                                                                                                                                                                                                                                                                                                                                                                                                                                                                                                                                                                    |

1  
2  
3 **Prediction of initiation and cessation of breast feeding from late**  
4 **pregnancy to 16 weeks: The Feeding Your Baby (FYB) cohort study**  
5  
6  
7

8  
9 **Peter T Donnan, Janet Dalzell, Andrew Symon, Petra Rauchhaus, Ewa Monteith-**  
10 **Hodge, Gillian Kellett, Jeremy C Wyatt, Heather M Whitford**  
11

12  
13  
14  
15 Dundee Epidemiology and Biostatistics Unit, Division of Population Health Sciences, Medical  
16 Research Institute, University of Dundee, Dundee, Scotland, UK, Peter T Donnan, professor  
17 Directorate of Public Health, NHS Tayside, Scotland, UK, Janet Dalzell, NHS Breastfeeding  
18 Coordinator

19 School of Nursing and Midwifery, University of Dundee, Dundee, Scotland, UK, Andrew Symon,  
20 lecturer

21 Dundee Epidemiology and Biostatistics Unit, Division of Population Health Sciences, Medical  
22 Research Institute, University of Dundee, Dundee, Scotland, UK, Petra Rauchhaus, statistician

23 School of Nursing and Midwifery, University of Dundee, Dundee, Scotland, UK, Ewa Monteith-  
24 Hodge, research assistant

25 School of Nursing and Midwifery, University of Dundee, Dundee, Scotland, UK, Gillian Kellett,  
26 research assistant

27 Leeds Institute of Health Sciences, University of Leeds, Leeds, England, UK, Jeremy C Wyatt,  
28 professor

29 School of Nursing and Midwifery, University of Dundee, Dundee, Scotland, UK, Heather M Whitford,  
30 lecturer.  
31

32  
33 Correspondence to: Heather M Whitford, School of Nursing and Midwifery, University of Dundee, 11  
34 Airlie Pl, Dundee DD1 4HJ, Scotland, UK, [h.m.whitford@dundee.ac.uk](mailto:h.m.whitford@dundee.ac.uk), tel - +44-1382 388647, fax  
35 - +44-1382 388533  
36  
37  
38  
39

40 Key words: mobile phone, SMS text messaging, breastfeeding, prediction model, cohort  
41  
42  
43  
44  
45  
46  
47  
48  
49  
50  
51  
52  
53  
54  
55  
56  
57  
58  
59  
60

## Abstract

**Objective** To derive prediction models for both initiation and cessation of breastfeeding using demographic, psychological and obstetric variables

**Design** A prospective cohort study

**Setting** Women delivering at Ninewells Hospital, Dundee, UK.

**Data Sources** Demographic data and psychological measures were obtained during pregnancy by questionnaire. Birth details, feeding method at birth and at hospital discharge were obtained from the Ninewells hospital database, Dundee, UK. Breastfeeding women were followed-up by text messages 2-weekly until 16 weeks or until breastfeeding was discontinued to ascertain feeding method and feeding intentions.

### Participants

Pregnant women over 30 weeks gestation aged 16 years and above, living in Dundee, booked to deliver at Ninewells Hospital, Dundee and able to speak English.

### Main outcome measure

Initiation and Cessation of breastfeeding

### Results

From the total cohort of women at delivery ( $n = 344$ ) 68% (95% CI 63% to 73%) of women had started breastfeeding at discharge. Significant predictors of initiating breastfeeding were older age, parity, greater intention to breastfeed from a Theory of Planned Behaviour (TPB)-based questionnaire, higher Iowa Infant Feeding Assessment Scale (IIFAS) score as well as living with a husband or partner. For the final model the AUROC was 0.967. For those who initiated breastfeeding ( $n = 233$ ), the strongest predictors of stopping were low intention to breastfeed from TPB, low IIFAS score and non-managerial / professional occupations.

### Conclusions

The findings from this study will be used to inform the protocol for an intervention study to encourage and support prolonged breastfeeding as intentions appear to be a key intervention focus for initiation. The predictive models could be used to identify women at high risk of not initiating and also women at high risk of stopping for interventions to improve longevity of breastfeeding.

## Article Summary

### Article Focus

- To identify antenatal factors which predict women who will initiate breastfeeding;
- Assess the critical time points for the discontinuation of breastfeeding;
- To identify the key antenatal and postnatal attributes and beliefs associated with continuation / cessation and develop predictive models

### Key Messages

- Comprehensive assessment of intentions and breastfeeding via novel SMS text messaging facilitated accurate prediction of breast feeding initiation and cessation
- Psychological factors as well as previous experience were shown to be important predictors of cessation before 16 weeks in predictive algorithms indicating the potential for early intervention
- These findings challenge the current interpretation of the UNICEF guidelines and suggest that a full discussion about infant feeding options in the antenatal period, including asking about intentions, could be used to identify women at risk of early cessation of breastfeeding.

### Strengths and Limitations of this study

A key strength was the accurate, validated, real-time and efficient measurement of method of infant feeding through SMS messaging. The study incorporated intentions and psychological factors based on the Theory of Planned Behaviour as predictors of initiation and cessation. This allowed the development of predictive algorithms and could allow the development and trialling of targeted interventions. This was based on a relatively large cohort covering the antenatal period to 16 weeks postnatal. One limitation may be the lack of ethnic diversity in the study population which is reflected in the ethnic structure of Tayside.

## Introduction

The short and long-term health benefits of breast feeding for both mother and child are well documented.<sup>1-4</sup> Consequently the current WHO recommendation is that infants should be exclusively breastfed for the first six months.<sup>5</sup> Most developed countries report that a minority of infants are exclusively breastfeeding at 6 months (40% Netherlands; 13% USA) and in the UK exclusive breastfeeding continued after 6 months in less than 1%.<sup>6</sup> There has been some success in the UK in improving the number of women who start breastfeeding: initiation rates of breastfeeding rose in Scotland from 63% in 2000 to 74% in 2010.<sup>7</sup> However targets to improve the rate of exclusive feeding at 6 – 8 weeks have proved more challenging. The Scottish Government aimed to increase exclusive breastfeeding at 6 – 8 weeks over a 4 year period to 33.3% by 2010/11<sup>8</sup>, however in 2010/11 the rate remained unchanged at 26.5%.<sup>9</sup> Given the rapid decline in breastfeeding in the immediate postnatal period, the failure to meet government targets and follow WHO recommendations, more detailed information about current practices and attitudes and the potential for intervention is required.

Maternal demographics and previous breastfeeding experience are known to be associated with both initiation as well as duration of breastfeeding<sup>9-10</sup> however these variables are not amenable to behavioural change interventions. The measurement of attitudinal factors such as the Iowa Infant Feeding Assessment Scale (IIFAS)<sup>11</sup> has shown promise as a way of improving the accuracy of prediction of the initiation of breastfeeding behaviour. The IIFAS has been found to predict breastfeeding initiation in a variety of settings including USA<sup>11</sup>, Australia<sup>12</sup>, Scotland<sup>13-14</sup>, Northern Ireland<sup>15</sup> and Romania.<sup>16</sup> However these studies have either only measured feeding at birth<sup>14</sup>, until discharge from hospital<sup>14,15</sup> or by retrospective maternal report.<sup>16</sup> The only study which prospectively followed women over a prolonged period was carried out in an area of high breastfeeding (94% initiation rate) and was biased by recruitment of women and measurement of baseline variables in the first 3 days after birth (rather than during pregnancy) by which time attitudes to infant feeding are likely to have been affected by experiences since birth.<sup>12</sup>

Hence there is little evidence for interventions based on psychological and attitudinal variables to improve breastfeeding outcomes. However a World Health Organisation programme (The Baby Friendly Initiative, BFI) to protect and support the initiation and continuation of breastfeeding by the implementation of evidence-based care in maternity hospitals is well-established.<sup>17</sup> Many hospitals and community settings strive to achieve 'UNICEF Baby Friendly Status' and there is some evidence that BFI accreditation can improve initiation and continuation rates.<sup>18-20</sup> Guidance from UNICEF for Step 3 of BFI accreditation, in the context of information provision, 'strongly recommends that pregnant women are not merely asked a closed question about how they plan to feed their baby.' (UNICEF 2011, page 13).<sup>21</sup> This is to encourage a more open discussion to take place and to allow women to make a final decision about feeding method after delivery. While the recommendation does not explicitly preclude a discussion about feeding intentions in the antenatal period, the guidelines suggest that the documentation of antenatal feeding intention should be avoided. In practice this has been interpreted more stringently; intentions are not discussed at all.

Building on past research we designed an exploratory longitudinal study using mixed methodology, including use of the IIFAS<sup>11</sup> and psychological variables guided by the Theory of Planned Behaviour<sup>22</sup> captured during the antenatal period, to understand and predict women's initiation and duration of breastfeeding in an area of low breastfeeding commencement. Use of the MRC framework<sup>23</sup> informed the qualitative and quantitative components of the study enabling us to advance our understanding of women's intentions and attitudes towards infant feeding. The study used SMS text messaging, a novel method of data collection, to follow up women after delivery. The validity and reliability of the method of SMS text messaging has already been reported elsewhere<sup>24</sup> as well as some of the qualitative results.<sup>25</sup>

This paper reports the identification of i) antenatal factors which predict women who will initiate breastfeeding; ii) the critical time points for the discontinuation of breastfeeding; and iii) the key antenatal and postnatal attributes and beliefs associated with continuation / cessation

From these data a predictive model was derived to identify those at high risk of stopping breastfeeding. The findings from this study will inform the recruitment protocol and design of an intervention to encourage breastfeeding in a future RCT testing the intervention efficacy.

## Methods

### Design

A prospective cohort study of the method of infant feeding following delivery.

### Participants

Pregnant women over 30 weeks gestation aged 16 years and above, living in Dundee, booked to deliver at Ninewells Hospital and able to speak English. There were no exclusions based on feeding intention or maternal history. The detailed reasons for exclusion are shown in appendix 2.

### Measures

Five data collection points were used:

1. Baseline data - self-completed questionnaire, third trimester of pregnancy:

Background demographic:

- Age, cohabitation and residency status, years since leaving school and occupation based on Standard Occupational Classification, ONS, 2010.<sup>26</sup> Socio-economic status derived from postcode and corresponding SIMD scores.

Obstetric measures:

- Expected Date of Delivery (EDD)
- Parity
- Previous infant feeding.

Psychological measures:

- *Iowa Infant Feeding Attitude Scale (IIFAS)*<sup>11</sup> a 17-item questionnaire with 5-point Likert scale response format from strongly agree to strongly disagree. Scores range from 17 – 85: higher score = more positive attitude to breastfeeding.
- *Theory of Planned Behaviour (TPB) questionnaire* study-specific 13 item questionnaire informed by the theories of planned behaviour and self-efficacy<sup>22</sup> assessed Attitude to breastfeeding (4 items), Social norm (2 items), Perceived Behavioural Control (PBC) (3 items) and Intention (4 items) each recorded on a 5-point scale (See appendix 3).

2. Delivery data - obtained through hospital records:

- Date of delivery, method of delivery, sex and weight of baby, method of infant feeding recorded at birth and at discharge from the hospital

Outcome variables:

3. Infant feeding collected by validated SMS text messages<sup>24</sup>:

Method(s) of infant feeding and future intentions, assessed after hospital discharge every 2 weeks using 2 text questions until response 'F' received to SMS1:

- SMS1. 'In the past 2 weeks how have you been feeding your baby?' (Answer options – only breast milk (O), both breast and formula milk (B), only formula milk (F)).
- SMS2. If 'only breast milk' or 'both breast and formula milk' – 'For how many more weeks do you plan to give your baby breast milk?'

4. Exit data (4 weeks after final SMS message):

- Method of infant feeding at study exit, problems with infant feeding, satisfaction with (breast) feeding support and satisfaction with feeding method(s) using 5-point Likert scale response format.

5. Focus groups and interviews with various sub-groups of women

### Procedure

Women were approached in the last trimester of pregnancy at clinics by a Community Midwife (CM) or a Research Assistant (RA). Consent was obtained for contact details to be passed to the study team in the form of returned postcards; women were given a baseline questionnaire and consent form. These were returned to the study team following a recruitment phone call by the RAs. Study incentives were used to motivate and encourage CMs to recruit.

The hospital database was checked weekly and as participants delivered, their delivery and discharge details were sent to the RAs. Starting from 2 weeks after delivery RAs used standard

1  
2  
3 web-based messaging tools to contact all participants by text to find out current feeding practices  
4 and intentions (Figure 1). Web-based messaging services sent automated texts via computer and  
5 used a text number for responses. Contact continued by text message every 2 weeks until the  
6 baby was 16 weeks old, or until the response 'F' was received. Women with no mobile phone or  
7 who preferred not to receive text messages were contacted by the RA on their home phone.  
8  
9

10  
11 The 'end' point for gathering text data was 2 weeks after delivery for women who started or who  
12 changed to formula feeding before 2 weeks; and on discontinuation of any breastfeeding or when  
13 the baby was 16 weeks old for the rest. Four weeks after the 'end' point women were phoned to  
14 gather final data (using an exit phone questionnaire). After the exit interview women were sent a  
15 letter thanking them and a £10 gift voucher.  
16

17 During the exit interview participants were invited to take part in a focus group or interview.  
18 Results are reported elsewhere.  
19

### 20 **Statistical Analysis**

21 Data were analysed using SAS version 9.2. Descriptive data are presented as % (frequency) for  
22 categorical variables, and mean (95% CI) for continuous variables.  
23

24 The total IIFAS Score and the sub-scores for the TPB variables were calculated from the  
25 questionnaires. Non-normally distributed variables were converted to categorical variables when  
26 there was no viable transformation.  
27

28 Baseline data were tested for correlations with duration of breastfeeding. ANOVA and Chi-Square  
29 tests were performed to test for significant associations of baseline variables with duration of  
30 breastfeeding and intention to breastfeed, and to examine differences between groups.  
31

32 The reliability of the text message responses (method of feeding) was checked by repeat-texting a  
33 random subset of 50 participants the next day. Validity was checked by phoning a random subset  
34 of 50 participants on the same day as their text response and asking them the same questions  
35 verbally and by comparison with data collected by the health visitor. The results, previously  
36 reported, demonstrated excellent reliability and validity.<sup>24</sup>  
37

38 Logistic regression modelling was implemented to assess predictors of initiating breastfeeding and  
39 the results expressed as Relative Risks (RR) and their 95% CIs.  
40

41 For those who initiated breastfeeding univariate associations between the duration of any and  
42 exclusive breastfeeding with baseline variables were performed using the logrank test for each of  
43 the baseline variables. Variables with a univariate significance level of at least 0.3 were chosen for  
44 potential inclusion in model building.  
45

46 Cox Proportional Hazards models were then built for all combinations of variables, utilizing both a  
47 forward and stepwise selection model including all variables. Models were then assessed for  
48 goodness of fit using the AIC and the best-fit model chosen. These models were utilised to predict  
49 the outcome of any breastfeeding and exclusive breastfeeding.  
50

51 Model performance was assessed by estimation of the c-statistic, a measure of discrimination as  
52 well as the Integrated Discrimination Index<sup>27</sup> to demonstrate the most important variables  
53 determining discrimination utilising the SAS macro %rocplus  
54 (<http://mayoresearch.mayo.edu/mayo/research/biostat/sasmacros.cfm>). Assessment of calibration  
55 was also carried out using methods suitable for censored data. Analyses were implemented in SPSS  
56 (version 18) and SAS v 9.2 (SAS Institute, Cary, NC, USA).  
57

### 58 **Sample size, Recruitment and Attrition**

59 The study aimed to recruit 350 women over an 8 month period, giving a recruitment rate of 35%.  
60 Of these approximately 224 (64%) would start breastfeeding (local Maternity Database figures  
from 2007), and 133 (38%) will still be breastfeeding at 6 - 8 weeks.<sup>9</sup> In considering predictors of



maintaining breast feeding at 6 - 8 weeks from birth, and approximately 130 events, there would be 80% power to detect Hazard Ratio  $\geq 1.6$  in a Cox regression model.

Between November 2009 and June 2010 a total of 639 postcards were received by the study team. From these, 355 women were fully consented and included in the study (55.6% of postcards received), which exceeded our target of 350 women (Figure 1 and full details in appendix 2). The SIMD profile of consented women broadly tracked the profile of all women who delivered in Dundee in 2009. A total of 292 women were followed up to the exit questionnaire (82.3% of consented women). Some of this follow up was protracted due to difficulties in contacting several participants.

At exit 152 women were asked about participating in a focus group or interview and 138 expressed an interest (91%). Of these, 38 took part in one of seven focus groups and 40 were interviewed individually (78 in total, 56% of those interested, 22% of total sample). The results of the qualitative analysis are reported elsewhere<sup>25</sup>.

### **SMS messages for collection of data about feeding method**

To manage the high number of automated SMS messages a computer schedule was created for the study (Figure 2). A total of 2738 text message responses were received via this automated SMS message scheduler. Data from 42 women were gathered by phone call on 114 occasions when the SMS system was unavailable. The SMS messaging service package incurred a small cost to participants: some participants may have been unable to respond if they had no credit on their phone. Two women were contacted on their home phone only: one had no mobile phone while the other preferred not to receive text messages.

## **Results**

### **Baseline Characteristics**

Three hundred and fifty five women were included in the study at baseline. Of these 344 (96.9%) had information on feeding status at delivery and prediction of initiating breast feeding was based on this cohort (Table 1). Baseline psychological measures (IIFAS score and TPB) are included in Table 1.

### **Prediction of Initiating Breastfeeding**

At delivery 67.7% (95% CI 62.8% to 72.6%) of women had started breastfeeding out of those with feeding data ( $n = 344$ ). Significant independent predictors of initiating breastfeeding were older age, parity, greater intention to breastfeed from the TPB questionnaire, higher IIFAS score as well as living with a husband or partner as shown in table 2. For the final logistic model the AUROC was 0.982 (95% CI 0.971 to 0.993) and calibration was good with Hosmer-Lemeshow test of  $p = 0.354$ . A score for estimation of the probability of initiation can be easily constructed using this final equation as shown in Appendix 1. This score can be utilised as a Clinical Prediction Rule (CPR) to identify women with low probability of initiating breastfeeding and interventions can be developed that are focussed on this group. Estimation of the IDI showed that Intention to Breastfeed with an IDI of 0.212 ( $p < 0.001$ ) was the strongest contributor to discrimination of initiating breastfeeding and entered the model first, followed by the IIFAS score with IDI = 0.024 ( $p = 0.034$ ).

### **Duration of breastfeeding**

For those with feeding data ( $n = 344$ ) Kaplan-Meier curves were fitted for exclusive breastfeeding (response 'only breast milk' to text question) and any breast milk (response 'both breast and formula milk' to text question) for each of the three subgroups defined by previous breastfeeding and parity. The duration of breastfeeding at various time points were derived (Figures 3a and b). These show that parous women who have previous experience of breastfeeding are most likely to start breastfeeding, more likely to continue to breastfeed exclusively and are slowest to discontinue any breastfeeding. In this experienced group, at 16 weeks 52.6% recorded any breastfeeding (33.0% exclusive). In contrast, parous women with no previous breastfeeding experience are least likely to start breastfeeding with a baseline of approximately 20%. In this group at 16 weeks only 5.0% were continuing with any breastfeeding (3.9% exclusive).

### **Prediction of stopping breastfeeding**

1  
2  
3 This analysis considered only those who initiated breastfeeding (n = 233) and what factors  
4 predicted cessation. As in Figure 3 analyses were carried out for both exclusive breastfeeding and  
5 any breastfeeding. The final model was chosen using the AIC and the best fit model comprised the  
6 variables: Previous breastfeeding, Intention to breastfeed, Total IIFAS score and Major  
7 occupational group based on ONS groups reclassified into four broad groupings. Neither Age nor  
8 SIMD were included in the final model as these are strongly correlated with occupation and  
9 previous breastfeeding. Those women who initiated breastfeeding and had higher IIFAS scores  
10 were highly significantly less likely to stop breastfeeding whether 'exclusive' or 'any' breastfeeding  
11 (Table 4). Those with higher intention scores had much greater duration than those with lower  
12 intention scores and were significantly associated with lower risk of stopping 'exclusive' or 'any'  
13 breastfeeding, with a 29% and 43% lower risk respectively.

14 In the final model there was also a trend across the occupations with lower breastfeeding in the  
15 routine and manual occupations. Parity was not such a strong predictor once intentions and IOWA  
16 score were included. The two most significant predictors of not stopping (for both exclusive and  
17 any breastfeeding) were high intention score and high IIFAS score (Table 4). The c-statistics for  
18 both models were  $c = 0.649$  (95% CI 0.605 to 0.693) and  $c = 0.689$  (95% CI 0.641 to 0.875) for  
19 'exclusive' and 'any' breastfeeding respectively. In these models the IDI was highest for the IIFAS  
20 with IDI=0.077 for 'exclusive' and IDI=0.074 for 'any' breastfeeding respectively. In contrast,  
21 although a statistically significant predictor, the IDI was negligible for intentions from the TPB  
22 questionnaire.

## 23 Discussion

24  
25 As far as can be established this is the first study of infant feeding in the weeks following birth  
26 using antenatal data gathered prospectively in real time in a large cohort. In order to achieve this,  
27 a novel method of collecting data via SMS text messaging was successfully developed, validated  
28 and utilised. This data collection method was demonstrated to have excellent reliability and  
29 validity.<sup>24</sup>

30  
31 A sample with a broadly similar overall SIMD profile to pregnant women in Dundee in 2009 was  
32 recruited with good representation from deprived areas which is often a problem in studying  
33 breastfeeding. Excellent follow-up through each phase of the study was achieved, and the  
34 quantitative phase was complemented by a large amount of qualitative data gathered from a  
35 diverse sample of participants with a range of feeding experiences.<sup>25</sup>

36  
37 Our cohort's figures for breastfeeding are broadly consistent with national and local rates of  
38 breastfeeding. 68% of the sample started breastfeeding compared to local figures 59% (local  
39 maternity database, 2009). Over the 6 – 8 weeks period 29.1% – 33.9% were exclusively  
40 breastfeeding and 44.1% – 48.3% were offering some breast milk. In comparison, Dundee City  
41 figures were: exclusive = 23.3%, and any = 33.4%; while the exclusive breastfeeding figure at 6-8  
42 weeks for Scotland was 26.5%.<sup>27</sup> The generally higher rates at all time-points may be accounted  
43 for by the slightly higher numbers of women in our study from more affluent areas, while the  
44 national Infant Feeding Survey data is based on retrospective reports.<sup>7</sup> The texting in itself may  
45 have acted as an intervention to encourage continuation of breastfeeding. It is also possible that  
46 our figures are more accurate as they are based on prospective real-time texts from the women.  
47 Overall, the consistency with known official statistics lends added validity to our results.

48  
49 The mean score on the IIFAS (58.8, SD 9.36) was similar to that reported by de la Mora (1999)<sup>11</sup>  
50 The dichotomous nature of the 'Intentions' variable suggests that in the latter stages of pregnancy  
51 most women are clear about how they plan to feed their baby, with only a few being undecided. As  
52 in previous studies of breastfeeding using the TPB, intentions were explained by PBC, attitudes and  
53 the IOWA score with demographic variables accounting for less of the variance.<sup>11, 29,30</sup>

54  
55 The Kaplan-Meier plots show the expected pattern of breastfeeding cessation, with the steepest  
56 drop-off occurring in the first couple of weeks after birth in all women for exclusive breastfeeding.  
57 However, large differences in the duration of breastfeeding could be observed between groups. In  
58 particular parous women with no previous breastfeeding experience stopped very quickly after  
59 birth, while primiparous women showed a similar pattern of duration to those parous women who  
60 did have previous breastfeeding experience so prior experience of breastfeeding is a strong

1  
2  
3 predictor. This is similar to the findings of the recent Scottish Infant Feeding Survey data from  
4 2010.<sup>7</sup>  
5  
6

7 In the prediction models, as others have found,<sup>31</sup> while demographic measures were important,  
8 the measures of intention (TPB) and attitude to breastfeeding (IIFAS score) were the strongest  
9 predictors of both initiation and stopping breastfeeding. However, intention was stronger for  
10 initiating breastfeeding, while attitude was stronger for persevering with breastfeeding. This has  
11 important clinical implications. We suggest that the current interpretation of the UNICEF Baby  
12 Friendly guidelines should be revisited. Our findings indicate that a discussion with women about  
13 their intentions, in combination with an exploration of their attitude to formula feeding and  
14 breastfeeding (perhaps through use of the IIFAS) could be a powerful way of identifying those  
15 women who might need more help and support with both initiating and persevering with  
16 breastfeeding. The findings also lend weight to the targeting of younger women and women from  
17 lower socioeconomic backgrounds both for extra encouragement to breastfeed and for additional  
18 breastfeeding support. Similar to other studies that have measured PBC in pregnancy, PBC was not  
19 a significant independent predictor of breastfeeding initiation.<sup>31,32</sup> However, unlike McMillan et al<sup>31</sup>  
20 we found that PBC was a weaker predictor of continuation than attitudes. Questions remain about  
21 the best time to measure PBC in relation to breastfeeding and the measures that should be used.  
22

### 23 **Importance to NHS and possible implementation**

24 Breastfeeding is known to have significant short and long-term health benefits for both mother and  
25 infant. Increasing the number of breastfed babies through targeted interventions has potential to  
26 prevent future ill-health, save the NHS money and is congruent with Government policy.<sup>33-35</sup> The  
27 findings of this study can be used both to identify women who need additional support and to  
28 inform the design of interventions to promote and support breastfeeding using a prediction model.  
29 Antenatal and public health interventions should aim to improve attitudes to breastfeeding  
30 generally and improve women's confidence in their ability to breastfeed. There is a need to target  
31 primigravidae during pregnancy and in the early postnatal days and weeks: as success with  
32 breastfeeding in the first pregnancy is likely to lead to more chance of feeding successfully in  
33 subsequent pregnancies. Parous women with no previous breastfeeding experience need the most  
34 support as they are most likely to give up quickly. The use of antenatal measures of intention and  
35 attitude to breastfeeding might be useful to identify women who are likely to need more support in  
36 the early days and weeks after delivery. Increased levels of support, perhaps from other women  
37 who have successfully breastfed might be an effective intervention strategy.  
38

### 39 **Future research**

40 This study has followed phase 1 of the MRC process, that is, collection of initial data and  
41 determining predictors of outcome.<sup>23</sup> The next stage will be to develop a complex interventions  
42 based on these findings both to improve rates of initiation of breastfeeding and to provide targeted  
43 support to those who commence breastfeeding. In addition, the discriminative ability for initiation  
44 was excellent but only moderate for stopping breastfeeding, while intention (TPB) was most  
45 important for initiating and attitude (IIFAS) most important for persevering with breastfeeding. This  
46 suggests there may be further factors in stopping that could be investigated; future studies could  
47 explore this issue.  
48

49 This study demonstrated the benefits of SMS messaging to collect data and so can easily be used in  
50 other studies to collect similar data. In addition text messaging may have potential as a cost-  
51 effective and convenient way to provide health information and support messages as part of a  
52 complex intervention. These suggestions could apply to breastfeeding, as well as having  
53 application in many other health arenas.  
54

### 55 **Conclusions**

56 This landmark study used SMS text messaging to gather real-time data on infant feeding from birth  
57 to 16 weeks postnatal. It provides the most detailed and comprehensive data on the form and  
58  
59  
60

1  
2  
3 method of infant feeding. The results are consistent with Scottish national figures, hence enhancing  
4 the validity of our findings.

5  
6 The construct of 'Intentions' (from the TPB) and a measure of attitude to breastfeeding (the IIFAS  
7 score) have been shown to be important in predicting future infant feeding behaviour, as well as  
8 socioeconomic background. Primigravidae and parous women with no previous breastfeeding  
9 experience are likely to need the most support as these groups are least likely to commence  
10 breastfeeding, and most likely to stop early.

### 11 **Acknowledgements**

12 We thank NHS Tayside colleagues: especially the Community Midwives in Dundee,  
13 Danke McLeod, who supplied the delivery and discharge data,  
14 Child Health for information about stillbirths and neonatal deaths,  
15 Massimo Brillante, software programmer in Health Informatics Centre  
16 (<http://medicine.dundee.ac.uk/hic>).

17 We also thank women who consented to take part and who generously gave their time.

18  
19 **Contributors:** PTD designed the study, supervised the statistical analysis, drafted the final paper  
20 and approved the final version; JD designed the study, involved in design of collection tools,  
21 commented on drafts and approved the final version; AS designed the study, contributed to  
22 collection tools, commented on drafts and approved the final version; PR carried out the statistical  
23 analysis, contributed to drafts and approved the final version; EM-H involved in design of collection  
24 tools, collected data, commented on drafts and approved the final version; GK involved in design of  
25 collection tools, collected data, commented on drafts and approved the final version; JW designed  
26 the study, supervision of the data collection, commented on drafts and approved the final version;  
27 HMW designed the study, involved in design of data collection tools, supervised the study as PI,  
28 commented on drafts and approved the final version.

29  
30  
31 **Ethics approval:** The study was granted approval by the NHS Tayside Research  
32 Ethics Committee on 08.07.2009 under reference 09/S1402/28.

33  
34 **Funding:** Financial support for the submitted work was based on a grant from the Chief Scientist  
35 Office of Scotland (CZH/4/568).

36  
37 **Competing Interests:** All authors have completed the ICMJE uniform disclosure form at  
38 [www.icmje.org/coi\\_disclosure.pdf](http://www.icmje.org/coi_disclosure.pdf) and declare: Financial support for the submitted work was based  
39 on a grant from the Chief Scientist Office of Scotland (CZH/4/568).  
40 PTD has received research grants from Otsuka, GSK and Pfizer, provides statistical support to the  
41 Scottish Medicines Consortium, has received royalties for predictive algorithms from Arhidia  
42 Informatics; JCW has received book royalties from Springer publishing; no other relationships or  
43 activities that could appear to have influenced the submitted work.

44  
45 **Data sharing:** No additional data are available.

46  
47 The Corresponding Author has the right to grant on behalf of all authors and does grant on behalf  
48 of all authors, [a worldwide licence](#) to the Publishers and its licensees in perpetuity, in all forms,  
49 formats and media (whether known now or created in the future), to i) publish, reproduce,  
50 distribute, display and store the Contribution, ii) translate the Contribution into other languages,  
51 create adaptations, reprints, include within collections and create summaries, extracts and/or,  
52 abstracts of the Contribution, iii) create any other derivative work(s) based on the Contribution, iv)  
53 to exploit all subsidiary rights in the Contribution, v) the inclusion of electronic links from the  
54 Contribution to third party material where-ever it may be located; and, vi) licence any third party  
55 to do any or all of the above."

### 56 **References**

- 57  
58 1. Howie P, Forsyth J, Ogston S, Clark A, du V Florey C. Protective effect of breastfeeding  
59 against infection. *BMJ*. 1990; 300: 11 - 16.

2. Kramer MS, Kakuma R. Optimal duration of exclusive breastfeeding. *Cochrane Database of Systematic Reviews* 2002, Issue 1. Art. No.: CD003517. DOI: 10.1002/14651858.CD003517.
3. Ip S, Chung M, Raman G, Chew P, Magula N, DeVine D. Breastfeeding and Maternal and Infant Health Outcomes in Developed Countries [Agency for Healthcare Research and Quality \(US\) Evidence Reports/Technology Assessments](#), 2007, No. 153 (<http://www.ncbi.nlm.nih.gov/books/NBK38337/>)
4. Duijts L, Ramadhani M, Moll H. Breastfeeding protects against infectious diseases during infancy in industrialized countries. A systematic review. *Maternal and Child Nutrition*. 2009; 5: 199 – 210.
5. World Health Organisation, 2011a. Exclusive breastfeeding for six months best for babies everywhere. ([http://www.who.int/mediacentre/news/statements/2011/breastfeeding\\_20110115/en/index.html](http://www.who.int/mediacentre/news/statements/2011/breastfeeding_20110115/en/index.html))
6. World Health Organisation, 2011b. WHO Global Health Indicators 2011. [http://www.who.int/gho/publications/world\\_health\\_statistics/EN\\_WHS2011\\_Part2.pdf](http://www.who.int/gho/publications/world_health_statistics/EN_WHS2011_Part2.pdf)
7. Health and Social Care Information Centre (HSCIC) (2012) Infant Feeding Survey 2010. Health and Social Care Information Centre, IFF Research <http://www.ic.nhs.uk/pubs/infantfeeding10final> (accessed 23.11.12)
8. The Scottish Government 2007. Better Health, Better Care. The Scottish Government: Edinburgh
9. ISD Scotland 2011, Breastfeeding Statistics. Information and Statistics Division <http://www.isdscotland.org/Health-Topics/Child-Health/Publications/2011-10-25/2011-10-25-Breastfeeding-Summary.pdf?40969485045> (accessed 17.5.12)
10. McInnes R, Love J, Stone D. Independent predictors of breastfeeding intention in a disadvantaged population of pregnant women. *BMC Public Health* 2001; 1: 10. <http://www.biomedcentral.com/1471-2458/1/10>
11. de La Mora A, Russell D, Dungy C, Losch M, Dusdieker L. The Iowa Infant Feeding Attitude Scale: analysis of reliability and validity. *Journal of Applied Social Psychology* 1999; 29: 2362 – 2380.
12. Scott J, Binns C, Oddy W, Graham K. Predictors of breastfeeding duration: evidence from a cohort study. *Pediatrics* 2006; 117: e646 – e655.
13. Scott J, Shaker I, Reid M. Parental attitudes toward breastfeeding: their association with feeding outcome at hospital discharge. *Birth*. 2004; 31: 125 – 131.
14. Dungy C, McInnes R, Tappin D, Wallis A, Oprescu F. Infant feeding attitudes and knowledge among socioeconomically disadvantaged women in Glasgow. *Maternal Child Health Journal*. 2008; 12: 313 – 322.
15. Sittlington J, Stewart-Knox B, Wright M, Bradbury I, Scott J. Infant-feeding attitudes of expectant mothers in Northern Ireland. *Health Education Research*. 2007; 22(4): 561 – 570.
16. Wallis AB, Brinzaniuc A, Chereches R, Oprescu F, Sirlincan E, David I, et al. Reliability and validity of the Romanian version of a scale to measure infant feeding attitudes and knowledge. *Acta Paediatrica*. 2008; 97: 1194 – 1199.
17. UNICEF (nd) Baby Friendly Initiative <http://www.unicef.org.uk/BabyFriendly/>
18. Beake S, Brinzaniuc A, Chereches R, Oprescu F, Sirlincan E, David I. A systematic review of structured compared with non-structured breastfeeding programmes to support the initiation and duration of exclusive and any breastfeeding in acute and primary health care settings. *Maternal and Child Nutrition*. 2012; 8: 141 – 161.
19. Kramer M, Chalmers B, Hodnett E, Sevkovskaya Z, Dzikovich I, Shapiro S, et al. Promotion of breastfeeding intervention trial (PROBIT). A randomized trial in the Republic of Belarus. *JAMA*; 2001; 285: 413-420.
20. Tappin DM, Mackenzie J, Brown A, Girdwood R, Britten J, Broadfoot M, et al. Breastfeeding rates are increasing in Scotland. *Health Bulletin* 2001; 59(2): 102-107.
21. UNICEF 2011. How to implement baby friendly standards: A guide for maternity settings UNICEF UK Baby Friendly Initiative, London. [http://www.unicef.org.uk/Documents/Baby\\_Friendly/Guidance/Implementation%20Guidance/Implementation\\_guidance\\_maternity\\_web.pdf](http://www.unicef.org.uk/Documents/Baby_Friendly/Guidance/Implementation%20Guidance/Implementation_guidance_maternity_web.pdf)
22. Ajzen, I. The Theory of Planned Behavior. *Organizational Behavior and Human Decision Processes* 1991; 50: 179 - 211.

- 1  
2  
3 23. Campbell NC, Murray E, Darbyshire J, Emery J, Farmer A, Griffiths F, et al. 2007. Designing  
4 and evaluating complex interventions to improve health care. *BMJ* 2007; 334: 455 – 459.
- 5 24. Whitford H, Donnan P, Symon A, Kellett G, Monteith-Hodge E, Rauchhaus P, et al.  
6 Evaluating the reliability, validity, acceptability and practicality of SMS text messaging as a  
7 tool to collect research data: results from the Feeding Your Baby project. *Journal of the*  
8 *American Medical Informatics Association*. amiajnl-2011-000785 Published Online First: 26  
9 April 2012
- 10 25. Symon AG, Whitford H, Dalzell J. Infant feeding in Eastern Scotland: A longitudinal mixed  
11 methods evaluation of antenatal intentions and postnatal satisfaction –The Feeding Your  
12 Baby study. *Midwifery* 2012, <http://dx.doi.org/10.1016/j.midw.2012.06.017>
- 13 26. Standard Occupational Classification 2010 (SOC) Office for National Statistics  
14 [http://www.ons.gov.uk/ons/guide-method/classifications/current-standard-](http://www.ons.gov.uk/ons/guide-method/classifications/current-standard-classifications/soc2010/index.html)  
15 [classifications/soc2010/index.html](http://www.ons.gov.uk/ons/guide-method/classifications/current-standard-classifications/soc2010/index.html) (accessed 17.5.12)
- 16 27. Pencina MJ, D'Agostino RB Sr, D'Agostino RB Jr. Evaluating the predictive ability of a new  
17 marker: From area under the ROC curve to reclassification and beyond. *Stat Med* 2008; 27:  
18 157-72.
- 19 28. ISD Scotland 2011, Breastfeeding Statistics. Information and Statistics Division  
20 [http://www.isdscotland.org/Health-Topics/Child-Health/Publications/2011-10-25/2011-10-](http://www.isdscotland.org/Health-Topics/Child-Health/Publications/2011-10-25/2011-10-25-Breastfeeding-Summary.pdf?40969485045)  
21 [25-Breastfeeding-Summary.pdf?40969485045](http://www.isdscotland.org/Health-Topics/Child-Health/Publications/2011-10-25/2011-10-25-Breastfeeding-Summary.pdf?40969485045) (accessed 17.5.12)
- 22 29. McMillan B, Conner M, Woolridge M, Dyson L, Green J, Renfrew M, et al. Predicting  
23 breastfeeding in women living in areas of economic hardship: explanatory role of the theory  
24 of planned behaviour. *Psychology and Health*. 2008; 23(7): 767 – 788.
- 25 30. Blyth R, Creedy D, Dennis, C, Moyle W, Pratt J, De Vries S. Effect of maternal confidence on  
26 breastfeeding duration: an application of the breastfeeding self-efficacy theory. *Birth* 2002;  
27 29: 278 – 284
- 28 31. McMillan B, Conner M, Woolridge M, Dyson L, Green J, Renfrew M, Bharj K, Clarke G.  
29 Predicting breastfeeding in women living in areas of economic hardship: Explanatory role of  
30 the theory of planned behaviour. *Psychology and Health* 2008; 23: 767 – 788.
- 31 32. Wambach K, Breastfeeding intention and outcome: A test of the theory of planned behavior.  
32 *Research in Nursing and Health* 1997; 20: 51 – 59.
- 33 33. The Scottish Government. 2011a. A Refreshed Framework for Maternity Care in Scotland.  
34 The Maternity Services Action Group. Edinburgh: The Scottish Government
- 35 34. The Scottish Government. 2011b. Reducing Antenatal Health Inequalities. Outcome  
36 Focused Evidence into Action Guidance. Edinburgh: The Scottish Government
- 37 35. Renfrew M, Pokhrel S, Quigley M, McCormick F, Fox-Rushby J, Dodds R, et al. Preventing  
38 disease and saving resources: the potential contribution of increasing breastfeeding rates in  
39 the UK. UNICEF, UK, 2012.  
40 [http://www.unicef.org.uk/Documents/Baby\\_Friendly/Research/Preventing\\_disease\\_saving\\_r](http://www.unicef.org.uk/Documents/Baby_Friendly/Research/Preventing_disease_saving_resources.pdf)  
41 [esources.pdf](http://www.unicef.org.uk/Documents/Baby_Friendly/Research/Preventing_disease_saving_resources.pdf) (accessed 17.5.12)
- 42  
43  
44  
45  
46  
47  
48  
49  
50  
51  
52  
53  
54  
55  
56  
57  
58  
59  
60

1  
2  
3  
4  
5  
6  
7  
8  
9  
10  
11  
12  
13  
14  
15  
16  
17  
18  
19  
20  
21  
22  
23  
24  
25  
26  
27  
28  
29  
30  
31  
32  
33  
34  
35  
36  
37  
38  
39  
40  
41  
42  
43  
44  
45  
46  
47  
48  
49  
50  
51  
52  
53  
54  
55  
56  
57  
58  
59  
60

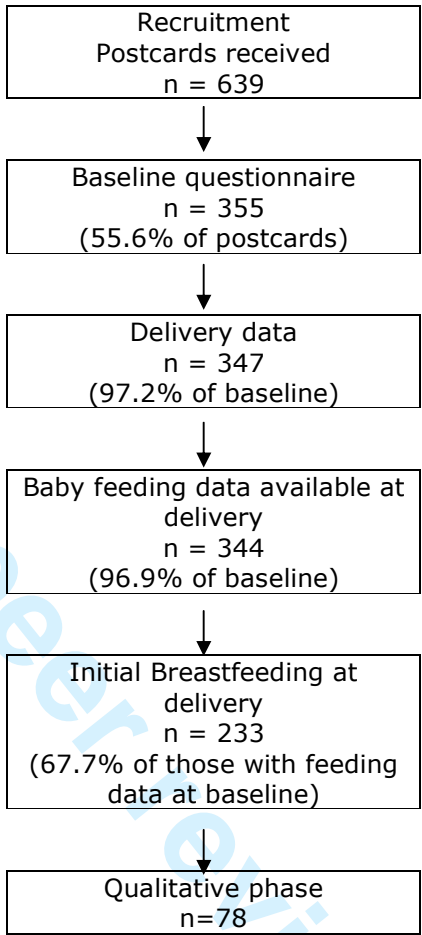

Figure 1: Flow chart of participant recruitment

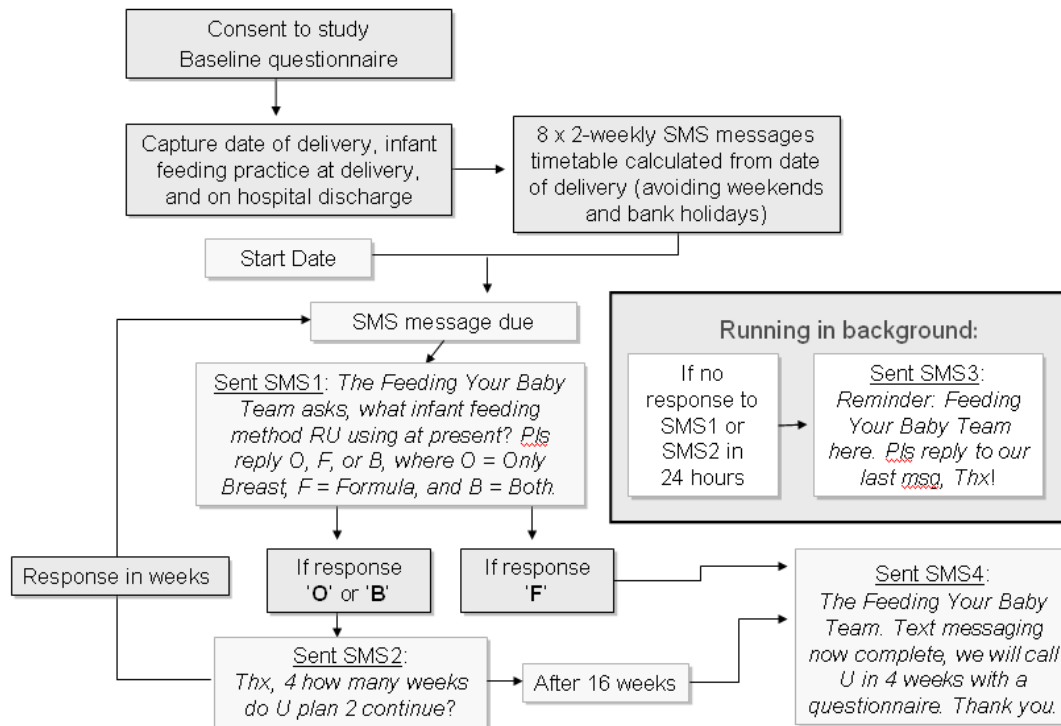

Figure 2: Schedule of SMS messages

For peer review only



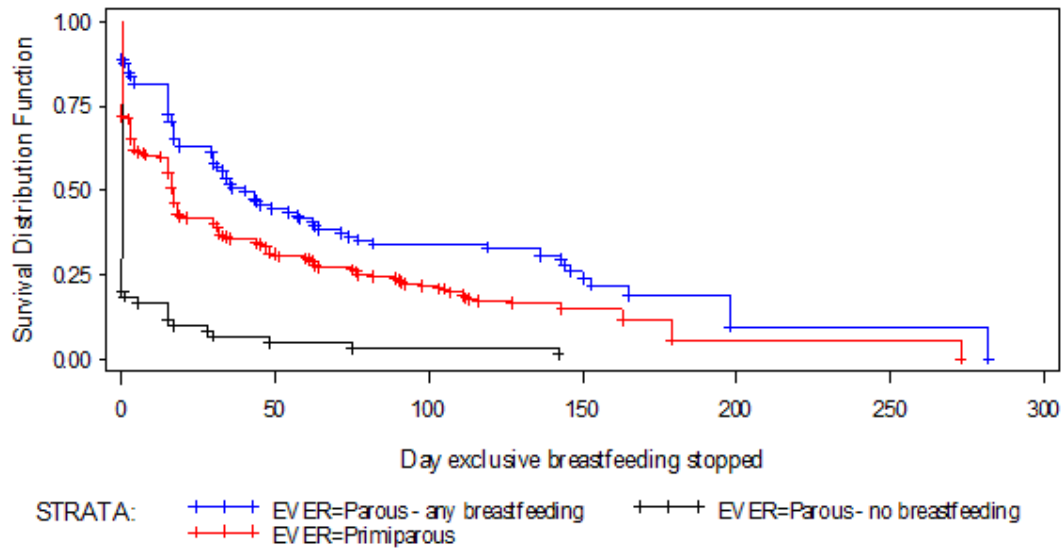

Figure 3a: Time to end of exclusive breastfeeding (WHO) in all women

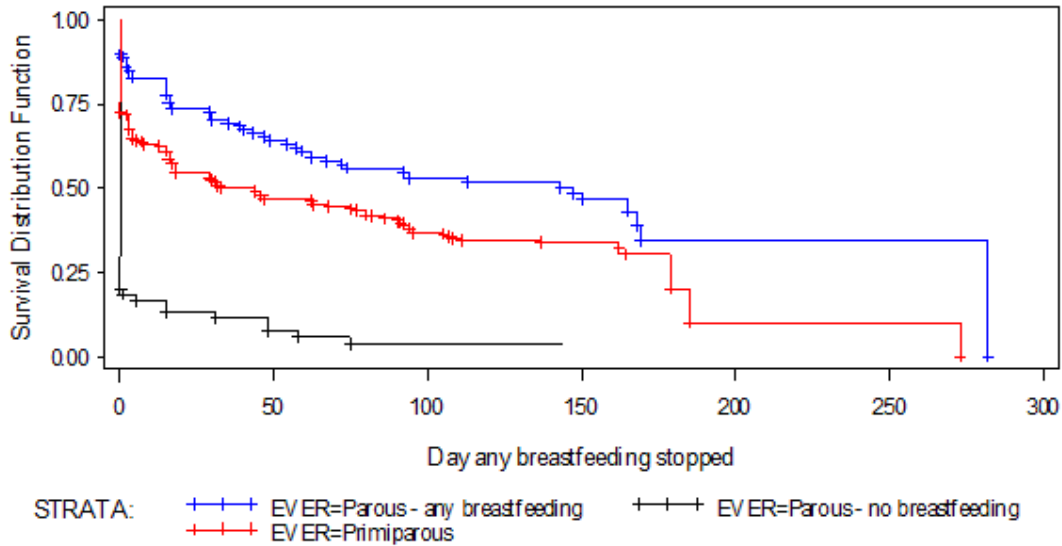

Figure 3b: Time to end of any breastfeeding in all women

**Table 1: Characteristics of Women by feeding method at Baseline delivery (n = 344)**

|                                                                   | Women who did not<br>initiate breastfeeding (n<br>= 111)<br>*Mean (SD) or<br>**% (N) | Women who initiated<br>breastfeeding (n = 233)<br>Mean (SD) or % (N) |
|-------------------------------------------------------------------|--------------------------------------------------------------------------------------|----------------------------------------------------------------------|
| Gestation at baseline (weeks)*                                    | 32.5 (5.3)                                                                           | 31.7 (5.9)                                                           |
| Age (years)*                                                      | 26.6 (6.2)                                                                           | 29.6 (5.4)                                                           |
| Years since leaving school*                                       | 15.9 (2.8)                                                                           | 17.9 (1.8)                                                           |
| Relationship status**                                             |                                                                                      |                                                                      |
| Single                                                            | 22.5 (25)                                                                            | 5.2 ( 12)                                                            |
| Married                                                           | 29.7 (33)                                                                            | 55.8 (130)                                                           |
| With partner                                                      | 46.8 (52)                                                                            | 38.6 ( 90)                                                           |
| Other                                                             | 0.0 ( 0)                                                                             | 0.4 ( 1)                                                             |
| Missing                                                           | 0.9 ( 1)                                                                             | 0.0 ( 0)                                                             |
| Living status**                                                   |                                                                                      |                                                                      |
| On own                                                            | 17.1 (19)                                                                            | 2.6 ( 6)                                                             |
| With husband or partner                                           | 58.6 (65)                                                                            | 89.3 (208)                                                           |
| With parents                                                      | 15.3 (17)                                                                            | 5.2 ( 12)                                                            |
| Other                                                             | 6.3 ( 7)                                                                             | 1.3 ( 3)                                                             |
| Missing                                                           | 2.7 ( 3)                                                                             | 1.7 ( 4)                                                             |
| Parity**                                                          |                                                                                      |                                                                      |
| First child                                                       | 45.0 (50)                                                                            | 54.5 (127)                                                           |
| Second child                                                      | 30.6 (34)                                                                            | 29.2 ( 68)                                                           |
| Third child or more                                               | 21.6 (24)                                                                            | 12.5 ( 29)                                                           |
| Missing                                                           | 2.7 ( 3)                                                                             | 3.9 ( 9)                                                             |
| Previous breastfeeding experience                                 |                                                                                      |                                                                      |
| Primiparous                                                       | 47.7 (53)                                                                            | 58.4 (136)                                                           |
| Parous – no previous<br>breastfeeding experience                  | 43.2 (48)                                                                            | 5.2 (12)                                                             |
| Parous – previous breastfeeding<br>experience                     | 9.0 (10)                                                                             | 36.5 (85)                                                            |
| Missing                                                           | 0.0 ( 0)                                                                             | 0.0 ( 0)                                                             |
| SIMD Quintile**                                                   |                                                                                      |                                                                      |
| Quintile 1 (most deprived)                                        | 47.7 (53)                                                                            | 30.5 (71)                                                            |
| Quintile 2                                                        | 20.7 (23)                                                                            | 10.3 (24)                                                            |
| Quintile 3                                                        | 8.1 ( 9)                                                                             | 12.4 (29)                                                            |
| Quintile 4                                                        | 15.3 (17)                                                                            | 30.9 (72)                                                            |
| Quintile 5 (most affluent)                                        | 7.2 ( 8)                                                                             | 15.9 (37)                                                            |
| Missing                                                           | 0.9 ( 1)                                                                             | 0.0 ( 0)                                                             |
| Occupations**                                                     |                                                                                      |                                                                      |
| Higher managerial, administrative<br>and professional occupations | 24.3 (27)                                                                            | 60.1 (140)                                                           |
| Intermediate occupations                                          | 16.2 (18)                                                                            | 12.0 ( 28)                                                           |
| Routine and manual occupations                                    | 18.9 (21)                                                                            | 11.6 ( 27)                                                           |
| Not in paid employment                                            | 34.2 (38)                                                                            | 15.5 ( 36)                                                           |
| Missing                                                           | 6.3 ( 7)                                                                             | 0.9 ( 2)                                                             |
| Total IIFAS score                                                 | 49.8 (6.29)                                                                          | 62.8 (7.46)                                                          |

|                                                                              | Women who did not<br>initiate breastfeeding (n<br>= 111)<br>*Mean (SD) or<br>**% (N) | Women who initiated<br>breastfeeding (n = 233)<br>Mean (SD) or % (N) |
|------------------------------------------------------------------------------|--------------------------------------------------------------------------------------|----------------------------------------------------------------------|
| TPB score 1: Attitude to<br>breastfeeding                                    | 2.6 (0.76)                                                                           | 4.2 (0.68)                                                           |
| TPB score 2: Subjective norm                                                 | 2.2 (0.3)                                                                            | 3.3 (1.0)                                                            |
| TPB score 3: Perceived behavioural<br>control                                | 2.6 (0.84)                                                                           | 3.8 (0.76)                                                           |
| TPB score 4: Intention to breastfeed <sup>†</sup>                            | 1.7 (0.96)                                                                           | 4.4 (0.96)                                                           |
| TPB score 4: Intention to breastfeed<br>categorical (% (number) <sup>∞</sup> |                                                                                      |                                                                      |
| No breastfeeding intended                                                    | 60.4 (67)                                                                            | 3.0 ( 7)                                                             |
| Undecided                                                                    | 38.7 (43)                                                                            | 45.1 (105)                                                           |
| Definite breastfeeding intended                                              | 0.0 ( 0)                                                                             | 51.9 (121)                                                           |
| Missing                                                                      | 0.9 ( 1)                                                                             | 0.0 ( 0)                                                             |

†: on a scale of 1 – 5

∞: 1 = No breastfeeding intended; 2 – 4 = Undecided; 5 = Definite breastfeeding intended

Table 2 Results of Multiple Logistic Regression of factors associated with initiating breast feeding (n = 344)

| Variable                                  | RR (95% CI)          | Chi Squared | p-value |
|-------------------------------------------|----------------------|-------------|---------|
| Age (years)                               | 1.11 [1.00 to 1.24]  | 4.077       | 0.044   |
| <b>Parity</b>                             |                      |             |         |
| Parous - no breastfeeding vs Primiparous  | 0.28 [0.12 to 0.69]  | 7.798       | 0.005   |
| Parous - any breastfeeding vs Primiparous | 2.67 [1.15 to 6.18]  | 5.294       | 0.021   |
| TPB score 4: Intention to breastfeed      | 4.67 [2.91 to 7.49]  | 40.759      | <.0001  |
| Total IIFAS Score                         | 1.17 [1.06 to 1.30]  | 9.238       | 0.002   |
| <b>Living Status</b>                      |                      |             |         |
| With husband or partner vs On own         | 6.07 [2.07 to 17.78] | 10.806      | 0.001   |
| With parents vs On own                    | 1.55 [0.38 to 6.27]  | 0.381       | 0.537   |
| Other vs On own                           | 0.24 [0.03 to 2.27]  | 1.542       | 0.214   |

review only

**Table 3: Predicted breastfeeding rates at different timepoints according to parity and any breastfeeding of previous children (from SMS data n = 344)**

|                                                    | Time           | Exclusive Breastfeeding<br>% | CI         | Any Breastfeeding<br>% | CI         |
|----------------------------------------------------|----------------|------------------------------|------------|------------------------|------------|
| All                                                | Baseline       | 67.6                         | [62 to 72] | 68.2                   | [63 to 73] |
|                                                    | 6 weeks        | 33.9                         | [29 to 39] | 48.3                   | [43 to 53] |
|                                                    | 8 weeks        | 29.1                         | [24 to 34] | 44.1                   | [39 to 49] |
|                                                    | 16 weeks       | 20.4                         | [16 to 25] | 34.5                   | [29 to 40] |
|                                                    | Exit Interview | 3.3                          | [0 to 12]  | 8.5                    | [1 to 27]  |
| Primiparous                                        | Baseline       | 71.7                         | [65 to 78] | 72.3                   | [65 to 78] |
|                                                    | 6 weeks        | 34.3                         | [28 to 41] | 50.1                   | [43 to 57] |
|                                                    | 8 weeks        | 29.3                         | [23 to 36] | 46.7                   | [39 to 54] |
|                                                    | 16 weeks       | 18.8                         | [14 to 25] | 34.5                   | [28 to 41] |
|                                                    | Exit Interview | 5.8                          | [1 to 18]  | 10.1                   | [1 to 32]  |
| Parous - no previous<br>breastfeeding              | Baseline       | 20.0                         | [11 to 31] | 18.3                   | [10 to 29] |
|                                                    | 6 weeks        | 5.0                          | [1 to 13]  | 11.7                   | [5 to 21]  |
|                                                    | 8 weeks        | 5.0                          | [1 to 13]  | 5.8                    | [2 to 14]  |
|                                                    | 16 weeks       | 3.9                          | [1 to 13]  | 5.0                    | [1 to 12]  |
|                                                    | Exit Interview | 1.7                          | [0 to 8]   | 3.9                    | [1 to 12]  |
| Parous - with previous<br>breastfeeding experience | Baseline       | 88.8                         | [81 to 94] | 89.8                   | [82 to 94] |
|                                                    | 6 weeks        | 46.6                         | [36 to 56] | 67.2                   | [57 to 76] |
|                                                    | 8 weeks        | 41.4                         | [32 to 51] | 62.0                   | [52 to 71] |
|                                                    | 16 weeks       | 33.0                         | [24 to 42] | 52.6                   | [42 to 62] |
|                                                    | Exit Interview | 9.3                          | [01 to 28] | 34.6                   | [21 to 49] |

**Table 4a: Final model using Cox Regression to predict stopping 'Exclusive' breastfeeding (n = 233)**

| Variable                                                       | Hazard Ratio | CI             | p-value |
|----------------------------------------------------------------|--------------|----------------|---------|
| Parous - any breastfeeding                                     | 0.873        | [0.63 to 1.21] | 0.4103  |
| Parous - no breastfeeding                                      | 0.809        | [0.41 to 1.58] | 0.5367  |
| Primiparous                                                    | 1.000        |                |         |
| Higher managerial, administrative and professional occupations | 0.726        | [0.46 to 1.15] | 0.1716  |
| Intermediate occupations                                       | 0.789        | [0.44 to 1.41] | 0.4246  |
| Routine and manual occupations                                 | 0.880        | [0.50 to 1.56] | 0.6601  |
| Not in paid employment                                         | 1.000        |                |         |
| TPB score 4: Intention to breastfeed (High vs low)             | 0.715        | [0.53 to 0.97] | 0.0317  |
| Total IIFAS Score (+ 10 units)                                 | 0.553        | [0.43 to 0.71] | <.0001  |

**Table 4b: Final model using Cox Regression to predict stopping 'Any' breastfeeding (n=233)**

| Variable                                                       | Hazard Ratio | CI             | p-value |
|----------------------------------------------------------------|--------------|----------------|---------|
| Parous - any breastfeeding                                     | 0.829        | [0.56 to 1.22] | 0.3426  |
| Parous - no breastfeeding                                      | 1.079        | [0.51 to 2.26] | 0.8403  |
| Primiparous                                                    | 1.000        |                |         |
| Higher managerial, administrative and professional occupations | 0.602        | [0.37 to 0.99] | 0.0457  |
| Intermediate occupations                                       | 0.622        | [0.32 to 1.21] | 0.1619  |
| Routine and manual occupations                                 | 0.714        | [0.37 to 1.39] | 0.3215  |
| Not in paid employment                                         | 1.000        |                |         |
| TPB score 4: Intention to breastfeed (High vs Low)             | 0.569        | [0.39 to 0.82] | 0.0026  |
| Total IIFAS Score (+ 10 units)                                 | 0.549        | [0.41 to 0.74] | <.0001  |

## Appendix 1

### Logistic model for prediction of initiation of breastfeeding

The probability of initiating breastfeeding can be derived from the model in Table 2, where:  
 $\text{Prob} = 1 / ( 1 + \exp (-\beta x) )$ .

Estimate the linear predictor  $\beta x =$   
 -17.1114  
 + 0.1078 x age  
 -1.2663 x Ever (Parous-no breastfeeding=1)  
 + 0.9835 x Ever (Parous - any breastfeeding=1)  
 + 1.8032 x Living (with husband or partner=1)  
 + 0.4395 x Living (with parents=1)  
 -1.4168 x Living (with other=1)  
 + 0.1597 x IIFAS  
 + 1.5407 x Intentions

Calculate  $\exp (-\beta x)$ ,  
 Then  $\text{Prob.} = 1 / ( 1 + \exp (-\beta x) )$

| Final Model: Initiation of Breastfeeding |                            |    |          |                |                 |         |
|------------------------------------------|----------------------------|----|----------|----------------|-----------------|---------|
| Parameter                                |                            | DF | Estimate | Standard Error | Wald Chi-Square | p-value |
| Intercept                                |                            | 1  | -17.1114 | 3.4021         | 25.2967         | <0.0001 |
| Age                                      |                            | 1  | 0.1078   | 0.0534         | 4.0770          | 0.0435  |
| Parity                                   | Parous - no breastfeeding  | 1  | -1.2663  | 0.4535         | 7.7977          | 0.0052  |
|                                          | Parous - any breastfeeding | 1  | 0.9835   | 0.4274         | 5.2943          | 0.0214  |
| Living                                   | With husband or partner    | 1  | 1.8032   | 0.5485         | 10.8058         | 0.0010  |
|                                          | With parents               | 1  | 0.4395   | 0.7121         | 0.3809          | 0.5371  |
|                                          | Other                      | 1  | -1.4168  | 1.1411         | 1.5417          | 0.2144  |
| IIFAS                                    |                            | 1  | 0.1597   | 0.0525         | 9.2383          | 0.0024  |
| Intentions                               |                            | 1  | 1.5407   | 0.2413         | 40.7592         | <0.0001 |

Derivation of points from the final model (n=344) for clinical use. Each question is based on the factors in the prediction model; Intentions (TPB), IIFAS score, living arrangements, parity and age. ( $B^* = 0.1078$ )

| Variable                   | B        | $\beta (W_{ij} - W_{iREF})$ | Points = $\beta (W_{ij} - W_{iREF})/B^*$ |
|----------------------------|----------|-----------------------------|------------------------------------------|
| Intercept                  | -17.1114 |                             | -159                                     |
| Intentions (TPB) +1        | 1.5407   |                             | 14                                       |
| IIFAS score +1             | 0.1597   |                             | 1.5                                      |
| Age +1 year                | 0.1078   |                             | 1                                        |
| Parous - no breastfeeding  | -1.2663  | -1.2663                     | -12                                      |
| Parous - any breastfeeding | 0.9835   | 0.9835                      | 9                                        |
| Primiparous                | 0        | 0                           | 0                                        |

|                                |         |         |     |
|--------------------------------|---------|---------|-----|
| Living with husband or partner | 1.8032  | 1.8032  | 17  |
| Living with parents            | 0.4395  | 0.4395  | 4   |
| Living with Other              | -1.4168 | -1.4168 | -13 |
| On own                         | 0       | 0       | 0   |

---

\*Sullivan LM, Massaro JM, D'Agostino RB Sr. Presentation of multivariate data for clinical use: The Framingham Study risk score function Statist Med 2004; 23: 1631-1660.

For peer review only



STROBE Statement—Checklist of items that should be included in reports of *cohort studies*

|                              | Item No | Recommendation                                                                                                                                                                                                                                                                                                                                                             |
|------------------------------|---------|----------------------------------------------------------------------------------------------------------------------------------------------------------------------------------------------------------------------------------------------------------------------------------------------------------------------------------------------------------------------------|
| <b>Title and abstract</b>    | 1       | (a) Indicate the study's design with a commonly used term in the title or the abstract <b>YES</b><br>(b) Provide in the abstract an informative and balanced summary of what was done and what was found <b>YES</b>                                                                                                                                                        |
| <b>Introduction</b>          |         |                                                                                                                                                                                                                                                                                                                                                                            |
| Background/rationale         | 2       | Explain the scientific background and rationale for the investigation being reported <b>YES</b>                                                                                                                                                                                                                                                                            |
| Objectives                   | 3       | State specific objectives, including any prespecified hypotheses <b>YES</b>                                                                                                                                                                                                                                                                                                |
| <b>Methods</b>               |         |                                                                                                                                                                                                                                                                                                                                                                            |
| Study design                 | 4       | Present key elements of study design early in the paper <b>YES</b>                                                                                                                                                                                                                                                                                                         |
| Setting                      | 5       | Describe the setting, locations, and relevant dates, including periods of recruitment, exposure, follow-up, and data collection <b>YES</b>                                                                                                                                                                                                                                 |
| Participants                 | 6       | (a) Give the eligibility criteria, and the sources and methods of selection of participants. Describe methods of follow-up <b>YES</b><br>(b) For matched studies, give matching criteria and number of exposed and unexposed <b>NA</b>                                                                                                                                     |
| Variables                    | 7       | Clearly define all outcomes, exposures, predictors, potential confounders, and effect modifiers. Give diagnostic criteria, if applicable <b>YES</b>                                                                                                                                                                                                                        |
| Data sources/<br>measurement | 8*      | For each variable of interest, give sources of data and details of methods of assessment (measurement). Describe comparability of assessment methods if there is more than one group <b>YES</b>                                                                                                                                                                            |
| Bias                         | 9       | Describe any efforts to address potential sources of bias <b>YES</b>                                                                                                                                                                                                                                                                                                       |
| Study size                   | 10      | Explain how the study size was arrived at <b>YES</b>                                                                                                                                                                                                                                                                                                                       |
| Quantitative variables       | 11      | Explain how quantitative variables were handled in the analyses. If applicable, describe which groupings were chosen and why <b>YES</b>                                                                                                                                                                                                                                    |
| Statistical methods          | 12      | (a) Describe all statistical methods, including those used to control for confounding <b>YES</b><br>(b) Describe any methods used to examine subgroups and interactions <b>YES</b><br>(c) Explain how missing data were addressed <b>NA</b><br>(d) If applicable, explain how loss to follow-up was addressed <b>NA</b><br>(e) Describe any sensitivity analyses <b>NA</b> |
| <b>Results</b>               |         |                                                                                                                                                                                                                                                                                                                                                                            |
| Participants                 | 13*     | (a) Report numbers of individuals at each stage of study—eg numbers potentially eligible, examined for eligibility, confirmed eligible, included in the study, completing follow-up, and analysed <b>YES</b><br>(b) Give reasons for non-participation at each stage <b>YES</b><br>(c) Consider use of a flow diagram <b>Yes</b>                                           |
| Descriptive data             | 14*     | (a) Give characteristics of study participants (eg demographic, clinical, social) and information on exposures and potential confounders <b>YES</b><br>(b) Indicate number of participants with missing data for each variable of interest <b>NA</b><br>(c) Summarise follow-up time (eg, average and total amount) <b>YES</b>                                             |
| Outcome data                 | 15*     | Report numbers of outcome events or summary measures over time <b>YES</b>                                                                                                                                                                                                                                                                                                  |
| Main results                 | 16      | (a) Give unadjusted estimates and, if applicable, confounder-adjusted estimates and their precision (eg, 95% confidence interval). Make clear which confounders were                                                                                                                                                                                                       |

|                          |    |                                                                                                                                                                                       |
|--------------------------|----|---------------------------------------------------------------------------------------------------------------------------------------------------------------------------------------|
|                          |    | adjusted for and why they were included <b>YES</b>                                                                                                                                    |
|                          |    | (b) Report category boundaries when continuous variables were categorized <b>YES</b>                                                                                                  |
|                          |    | (c) If relevant, consider translating estimates of relative risk into absolute risk for a meaningful time period <b>YES</b>                                                           |
| Other analyses           | 17 | Report other analyses done—eg analyses of subgroups and interactions, and sensitivity analyses <b>YES</b>                                                                             |
| <b>Discussion</b>        |    |                                                                                                                                                                                       |
| Key results              | 18 | Summarise key results with reference to study objectives <b>YES</b>                                                                                                                   |
| Limitations              | 19 | Discuss limitations of the study, taking into account sources of potential bias or imprecision. Discuss both direction and magnitude of any potential bias <b>YES</b>                 |
| Interpretation           | 20 | Give a cautious overall interpretation of results considering objectives, limitations, multiplicity of analyses, results from similar studies, and other relevant evidence <b>YES</b> |
| Generalisability         | 21 | Discuss the generalisability (external validity) of the study results <b>YES</b>                                                                                                      |
| <b>Other information</b> |    |                                                                                                                                                                                       |
| Funding                  | 22 | Give the source of funding and the role of the funders for the present study and, if applicable, for the original study on which the present article is based <b>YES</b>              |

\*Give information separately for exposed and unexposed groups.

**Note:** An Explanation and Elaboration article discusses each checklist item and gives methodological background and published examples of transparent reporting. The STROBE checklist is best used in conjunction with this article (freely available on the Web sites of PLoS Medicine at <http://www.plosmedicine.org/>, Annals of Internal Medicine at <http://www.annals.org/>, and Epidemiology at <http://www.epidem.com/>). Information on the STROBE Initiative is available at <http://www.strobe-statement.org>.

1  
2  
3  
4  
5  
6  
7  
8 **Prediction of initiation and cessation of breast feeding from late**  
9 **pregnancy to 16 weeks: The Feeding Your Baby (FYB) cohort study**  
10

11  
12 **Peter T Donnan, Janet Dalzell, Andrew Symon, Petra Rauchhaus, Ewa Monteith-**  
13 **Hodge, Gillian Kellett, Jeremy C Wyatt, Heather M Whitford**  
14

15  
16  
17 Dundee Epidemiology and Biostatistics Unit, Division of Population Health Sciences, Medical  
18 Research Institute, University of Dundee, Dundee, Scotland, UK, Peter T Donnan, professor  
19 Directorate of Public Health, NHS Tayside, Scotland, UK, Janet Dalzell, NHS Breastfeeding  
20 Coordinator  
21 School of Nursing and Midwifery, University of Dundee, Dundee, Scotland, UK, Andrew Symon,  
22 lecturer  
23 Dundee Epidemiology and Biostatistics Unit, Division of Population Health Sciences, Medical  
24 Research Institute, University of Dundee, Dundee, Scotland, UK, Petra Rauchhaus, statistician  
25 School of Nursing and Midwifery, University of Dundee, Dundee, Scotland, UK, Ewa Monteith-  
26 Hodge, research assistant  
27 School of Nursing and Midwifery, University of Dundee, Dundee, Scotland, UK, Gillian Kellett,  
28 research assistant  
29 Leeds Institute of Health Sciences, University of Leeds, Leeds, England, UK, Jeremy C Wyatt,  
30 professor  
31 School of Nursing and Midwifery, University of Dundee, Dundee, Scotland, UK, Heather M Whitford,  
32 lecturer.

33 Correspondence to: Heather M Whitford, School of Nursing and Midwifery, University of Dundee, 11  
34 Airlie Pl, Dundee DD1 4HJ, Scotland, UK, [h.m.whitford@dundee.ac.uk](mailto:h.m.whitford@dundee.ac.uk), tel - +44-1382 388647, fax  
35 - +44-1382 388533  
36  
37

38 Key words: mobile phone, SMS text messaging, breastfeeding, prediction model, cohort  
39  
40  
41  
42  
43  
44  
45  
46  
47  
48  
49  
50  
51  
52  
53  
54  
55  
56  
57  
58  
59  
60

## Abstract

**Objective** To derive prediction models for both initiation and cessation of breastfeeding using demographic, psychological and obstetric variables

**Design** A prospective cohort study

**Setting** Women delivering at Ninewells Hospital, Dundee, UK.

**Data Sources** Demographic data and psychological measures were obtained during pregnancy by questionnaire. Birth details, feeding method at birth and at hospital discharge were obtained from the Ninewells hospital database, Dundee, UK. Breastfeeding women were followed-up by text messages 2-weekly until 16 weeks or until breastfeeding was discontinued to ascertain feeding method and feeding intentions.

## Participants

Pregnant women over 30 weeks gestation aged 16 years and above, living in Dundee, booked to deliver at Ninewells Hospital, Dundee and able to speak English.

## Main outcome measure

Initiation and Cessation of breastfeeding

## Results

From the total cohort of women at delivery ( $n = 344$ ) 68% (95% CI 63% to 73%) of women had started breastfeeding at discharge. Significant predictors of initiating breastfeeding were older age, parity, greater intention to breastfeed from a Theory of Planned Behaviour (TPB)-based questionnaire, higher Iowa Infant Feeding Assessment Scale (IIFAS) score as well as living with a husband or partner. For the final model the AUROC was 0.967. For those who initiated breastfeeding ( $n = 233$ ), the strongest predictors of stopping were low intention to breastfeed from TPB, low IIFAS score and non-managerial / professional occupations.

## Conclusions

The findings from this study will be used to inform the protocol for an intervention study to encourage and support prolonged breastfeeding as intentions appear to be a key intervention focus for initiation. The predictive models could be used to identify women at high risk of not initiating and also women at high risk of stopping for interventions to improve longevity of breastfeeding.

## Article Summary

### Article Focus

- To identify antenatal factors which predict women who will initiate breastfeeding;
- Assess the critical time points for the discontinuation of breastfeeding;
- To identify the key antenatal and postnatal attributes and beliefs associated with continuation / cessation and develop predictive models

### Key Messages

- Comprehensive assessment of intentions and breastfeeding via novel SMS text messaging facilitated accurate prediction of breast feeding initiation and cessation
- Psychological factors as well as previous experience were shown to be important predictors of cessation before 16 weeks in predictive algorithms indicating the potential for early intervention
- These findings challenge the current interpretation of the UNICEF guidelines and suggest that a full discussion about infant feeding options in the antenatal period, including asking about intentions, could be used to identify women at risk of early cessation of breastfeeding.

### Strengths and Limitations of this study

A key strength was the accurate, validated, real-time and efficient measurement of method of infant feeding through SMS messaging. The study incorporated intentions and psychological factors based on the Theory of Planned Behaviour as predictors of initiation and cessation. This allowed the development of predictive algorithms and **points-to-targeting** could allow the development and trialling of **targeted** interventions. This was based on a relatively large cohort covering the antenatal period to 16 weeks postnatal. One limitation may be the lack of ethnic diversity in the study population which is reflected in the ethnic structure of Tayside.

## Introduction

The short and long-term health benefits of breast feeding for both mother and child are well documented.<sup>1-4</sup> Consequently the current WHO recommendation is that infants should be exclusively breastfed for the first six months.<sup>5</sup> Most developed countries report that a minority of infants are exclusively breastfeeding at 6 months (40% Netherlands; 13% USA) and in the UK exclusive breastfeeding continued after 6 months in less than 1%.<sup>6</sup> There has been some success in the UK in improving the number of women who start breastfeeding: initiation rates of breastfeeding rose in Scotland from 63% in 2000 to 74% in 2010.<sup>7</sup> However targets to improve the rate of exclusive feeding at 6 – 8 weeks have proved more challenging. The Scottish Government aimed to increase exclusive breastfeeding at 6 – 8 weeks over a 4 year period to 33.3% by 2010/11<sup>8</sup>, however in 2010/11 the rate remained unchanged at 26.5%.<sup>9</sup> Given the rapid decline in breastfeeding in the immediate postnatal period, the failure to meet government targets and follow WHO recommendations, more detailed information about current practices and attitudes and the potential for intervention is required.

Maternal demographics and previous breastfeeding experience are known to be associated with both initiation as well as duration of breastfeeding<sup>9-10</sup> however these variables are not amenable to behavioural change interventions. The measurement of attitudinal factors such as the Iowa Infant Feeding Assessment Scale (IIFAS)<sup>11</sup> has shown promise as a way of improving the accuracy of prediction of the initiation of breastfeeding behaviour. The IIFAS has been found to predict breastfeeding initiation in a variety of settings including USA<sup>11</sup>, Australia<sup>12</sup>, Scotland<sup>13-14</sup>, Northern Ireland<sup>15</sup> and Romania.<sup>16</sup> However these studies have either only measured feeding at birth<sup>14</sup>, until discharge from hospital<sup>14,15</sup> or by retrospective maternal report.<sup>16</sup> The only study which prospectively followed women over a prolonged period was carried out in an area of high breastfeeding (94% initiation rate) and was biased by recruitment of women and measurement of baseline variables in the first 3 days after birth (rather than during pregnancy) by which time attitudes to infant feeding are likely to have been affected by experiences since birth.<sup>12</sup>

Hence there is little evidence for interventions based on psychological and attitudinal variables to improve breastfeeding outcomes. However a World Health Organisation programme (The Baby Friendly Initiative, BFI) to protect and support the initiation and continuation of breastfeeding by the implementation of evidence-based care in maternity hospitals is well-established.<sup>17</sup> Many hospitals and community settings strive to achieve 'UNICEF Baby Friendly Status' and there is some evidence that BFI accreditation can improve [initiation and continuation rates breastfeeding rates](#).<sup>18-20</sup> Guidance from UNICEF for Step 3 of BFI accreditation, in the context of information provision, 'strongly recommends that pregnant women are not merely asked a closed question about how they plan to feed their baby.' (UNICEF 2011, page 13).<sup>21</sup> This is to encourage a more open discussion to take place and to allow women to make a final decision about feeding method after delivery. While the recommendation does not explicitly preclude a discussion about feeding intentions in the antenatal period, the guidelines suggest that the documentation of antenatal feeding intention should be avoided. In practice this has been interpreted more stringently; intentions are not discussed at all.

Building on past research we designed an exploratory longitudinal study using mixed methodology, including use of the IIFAS<sup>11</sup> and psychological variables guided by the Theory of Planned Behaviour<sup>22</sup> captured during the antenatal period, to understand and predict women's initiation and duration of breastfeeding in an area of low breastfeeding commencement. Use of the MRC framework<sup>23</sup> informed the qualitative and quantitative components of the study enabling us to advance our understanding of women's intentions and attitudes towards infant feeding. The study used SMS text messaging, a novel method of data collection, to follow up women after delivery. The validity and reliability of the method of SMS text messaging has already been reported elsewhere<sup>24</sup> as well as some of the qualitative results.<sup>25</sup>

This paper reports the identification of i) antenatal factors which predict women who will initiate breastfeeding; ii) the critical time points for the discontinuation of breastfeeding; and iii) the key antenatal and postnatal attributes and beliefs associated with continuation / cessation

From these data a predictive model was derived to identify those at high risk of stopping breastfeeding. The findings from this study will inform the recruitment protocol and design of an intervention to encourage breastfeeding in a future RCT testing the intervention efficacy.

## Methods

### Design

A prospective cohort study of the method of infant feeding following delivery.

### Participants

Pregnant women over 30 weeks gestation aged 16 years and above, living in Dundee, booked to deliver at Ninewells Hospital and able to speak English. [There were no exclusions based on feeding intention or maternal history. The detailed reasons for exclusion are shown in appendix 2.](#)

### Measures

Five data collection points were used:

1. Baseline data - self-completed questionnaire, third trimester of pregnancy:

Background demographic:

- Age, cohabitation and residency status, years since leaving school and occupation [based on Standard Occupational Classification, ONS, 2010.](#)<sup>26</sup> Socio-economic status derived from postcode and corresponding SIMD scores.

Obstetric measures:

- Expected Date of Delivery (EDD)
- Parity
- Previous infant feeding.

Psychological measures:

- *Iowa Infant Feeding Attitude Scale (IIFAS)*<sup>11</sup> a 17-item questionnaire with 5-point Likert scale response format from strongly agree to strongly disagree. Scores range from 17 – 85: higher score = more positive attitude to breastfeeding.
- *Theory of Planned Behaviour (TPB) questionnaire* study-specific 13 item questionnaire informed by the theories of planned behaviour and self-efficacy<sup>22</sup> assessed Attitude to breastfeeding (4 items), Social norm (2 items), Perceived Behavioural Control (PBC) (3 items) and Intention (4 items) each recorded on a 5-point scale ~~from strongly agree to strongly disagree.~~ [\(See appendix 3\).](#)

2. Delivery data - obtained through hospital records:

- Date of delivery, method of delivery, sex and weight of baby, method of infant feeding recorded at birth and at discharge from the hospital

### Outcome variables:

3. Infant feeding collected by validated SMS text messages<sup>24</sup>:

Method(s) of infant feeding and future intentions, assessed after hospital discharge every 2 weeks using 2 text questions until response 'F' received to SMS1:

- SMS1. 'In the past 2 weeks how have you been feeding your baby?' (Answer options – only breast milk (O), both breast and formula milk (B), only formula milk (F)).
- SMS2. If 'only breast milk' or 'both breast and formula milk' – 'For how many more weeks do you plan to give your baby breast milk?'
- 4. Exit data (4 weeks after final SMS message):
- Method of infant feeding at study exit, problems with infant feeding, satisfaction with (breast) feeding support and satisfaction with feeding method(s) using 5-point Likert scale response format.
- 5. Focus groups and interviews with various sub-groups of women

### Procedure

Women were approached in the last trimester of pregnancy at clinics by a Community Midwife (CM) or a Research Assistant (RA). Consent was obtained for contact details to be passed to the study team in the form of returned postcards; women were given a baseline questionnaire and consent form. These were returned to the study team following a recruitment phone call by the RAs. Study incentives were used to motivate and encourage CMs to recruit.

1  
2  
3  
4  
5  
6  
7  
8 The hospital database was checked weekly and as participants delivered, their delivery and  
9 discharge details were sent to the RAs. Starting from 2 weeks after delivery RAs used standard  
10 web-based messaging tools to contact all participants by text to find out current feeding practices  
11 and intentions (Figure 1). Web-based messaging services sent automated texts via computer and  
12 used a text number for responses. Contact continued by text message every 2 weeks until the  
13 baby was 16 weeks old, or until the response 'F' was received. Women with no mobile phone or  
14 who preferred not to receive text messages were contacted by the RA on their home phone.

15  
16 The 'end' point for gathering text data was 2 weeks after delivery for women who started or who  
17 changed to formula feeding before 2 weeks; and on discontinuation of any breastfeeding or when  
18 the baby was 16 weeks old for the rest. Four weeks after the 'end' point women were phoned to  
19 gather final data (using an exit phone questionnaire). After the exit interview women were sent a  
20 letter thanking them and a £10 gift voucher.

21 During the exit interview participants were invited to take part in a focus group or interview. ~~These~~  
22 ~~were organised with sub-groups of women representing a range of feeding experiences. Groups~~  
23 ~~were kept as homogenous as possible and were held in a central location in Dundee. One to one~~  
24 ~~interviews were carried out in the participant's home or in University premises. Focus groups and~~  
25 ~~interviews continued until data saturation had been reached (topic guide Appendix 1). Expenses~~  
26 ~~and a 'thank you' gift voucher were given for participation in this phase. Results are reported~~  
27 elsewhere.

### 27 **Statistical Analysis**

28 Data were analysed using SAS version 9.2. Descriptive data are presented as % (frequency) for  
29 categorical variables, and mean (95% CI) for continuous variables.

30 The total IIFAS Score and the sub-scores for the TPB variables were calculated from the  
31 questionnaires. Non-normally distributed variables were converted to categorical variables when  
32 there was no viable transformation.

33 Baseline data were tested for correlations with duration of breastfeeding. ANOVA and Chi-Square  
34 tests were performed to test for significant associations of baseline variables with duration of  
35 breastfeeding and intention to breastfeed, and to examine differences between groups.

36 The reliability of the text message responses (method of feeding) was checked by repeat-texting a  
37 random subset of 50 participants the next day. Validity was checked by phoning a random subset  
38 of 50 participants on the same day as their text response and asking them the same questions  
39 verbally and by comparison with data collected by the health visitor. The results, previously  
40 reported, demonstrated excellent reliability and validity.<sup>24</sup>

41 Logistic regression modelling was implemented to assess predictors of initiating breastfeeding and  
42 the results expressed as Relative RisksOdds Ratios (ROR) and their 95% CIs.

43 For those who initiated breastfeeding univariate associations between the duration of any and  
44 exclusive breastfeeding with baseline variables were performed using the logrank test for each of  
45 the baseline variables. Variables with a univariate significance level of at least 0.3 were chosen for  
46 potential inclusion in model building.

47 Cox Proportional Hazards models were then built for all combinations of variables, utilizing both a  
48 forward and stepwise selection model including all variables. Models were then assessed for  
49 goodness of fit using the AIC and the best-fit model chosen. These models were utilised to predict  
50 the outcome of any breastfeeding and exclusive breastfeeding.

51 Model performance was assessed by estimation of the c-statistic, a measure of discrimination as  
52 well as the Integrated Discrimination Index<sup>25</sup> to demonstrate the most important variables  
53 determining discrimination utilising the SAS macro %rocplus  
54 (<http://mayoresearch.mayo.edu/mayo/research/biostat/sasmacros.cfm>). Assessment of calibration



was also carried out using methods suitable for censored data. Analyses were implemented in SPSS (version 18) and SAS v 9.2 (SAS Institute, Cary, NC, USA).

### Sample size, Recruitment and Attrition

The study aimed to recruit 350 women over an 8 month period, giving a recruitment rate of 35%. Of these approximately 224 (64%) would start breastfeeding (local Maternity Database figures from 2007), and 133 (38%) will still be breastfeeding at 6 - 8 weeks.<sup>9</sup> In considering predictors of maintaining breast feeding at 6 - 8 weeks from birth, and approximately 130 events, there would be 80% power to detect Hazard Ratio  $\geq 1.6$  in a Cox regression model.

Between November 2009 and June 2010 a total of 639 postcards were received by the study team. From these, 355 women were fully consented and included in the study (55.6% of postcards received), which exceeded our target of 350 women (Figure 1 [and full details in appendix 2](#)). The SIMD profile of consented women broadly tracked the profile of all women who delivered in Dundee in 2009. A total of 292 women were followed up to the exit questionnaire (82.3% of consented women). Some of this follow up was protracted due to difficulties in contacting several participants.

At exit 152 women were asked about participating in a focus group or interview and 138 expressed an interest (91%). Of these, 38 took part in one of seven focus groups and 40 were interviewed individually (78 in total, 56% of those interested, 22% of total sample). The results of the qualitative analysis are reported elsewhere<sup>25</sup>.

### SMS messages for collection of data about feeding method

To manage the high number of automated SMS messages a computer schedule was created for the study (Figure 2). A total of 2738 text message responses were received via this automated SMS message scheduler. Data from 42 women were gathered by phone call on 114 occasions when the SMS system was unavailable. The SMS messaging service package incurred a small cost to participants: some participants may have been unable to respond if they had no credit on their phone. Two women were contacted on their home phone only: one had no mobile phone while the other preferred not to receive text messages.

## Results

### Baseline Characteristics

Three hundred and fifty five women were included in the study at baseline. Of these 344 (96.9%) had information on feeding status at delivery and prediction of initiating breast feeding was based on this cohort (Table 1). Baseline psychological measures (IIFAS score and TPB) are included in Table 1.

### Prediction of Initiating Breastfeeding

At delivery 67.7% (95% CI 62.8% to 72.6%) of women had started breastfeeding out of those with feeding data (n = 344). Significant independent predictors of initiating breastfeeding were older age, parity, greater intention to breastfeed from the TPB questionnaire, higher IIFAS score as well as living with a husband or partner as shown in table 2. For the final logistic model the AUROC was 0.982 (95% CI 0.971 to 0.993) and calibration was good with Hosmer-Lemeshow test of p = 0.354. A score for estimation of the probability of initiation can be easily constructed using this final equation as shown in Appendix 1. This score can be utilised as a Clinical Prediction Rule (CPR) to identify women with low probability of initiating breastfeeding and interventions can be developed that are focussed on this group. Estimation of the IDI showed that Intention to Breastfeed with an IDI of 0.212 (p < 0.001) was the strongest contributor to discrimination of initiating breastfeeding and entered the model first, followed by the IIFAS score with IDI = 0.024 (p = 0.034).

### Duration of breastfeeding

For those with feeding data (n = 344) Kaplan-Meier curves were fitted for exclusive breastfeeding (response 'only breast milk' to text question) and any breast milk (response 'both breast and formula milk' to text question) for each of the three subgroups defined by previous breastfeeding and parity. The duration of breastfeeding at various time points were derived (Figures 3a and b). These show that parous women who have previous experience of breastfeeding are most likely to

1  
2  
3  
4  
5  
6  
7  
8 start breastfeeding, more likely to continue to breastfeed exclusively and are slowest to discontinue  
9 any breastfeeding. In this experienced group, at 16 weeks 52.6% recorded any breastfeeding  
10 (33.0% exclusive). In contrast, parous women with no previous breastfeeding experience are least  
11 likely to start breastfeeding with a baseline of approximately 20%. In this group at 16 weeks only  
12 5.0% were continuing with any breastfeeding (3.9% exclusive).

### 12 Prediction of stopping breastfeeding

13 This analysis considered only those who initiated breastfeeding (n = 233) and what factors  
14 predicted cessation. As in Figure 3 analyses were carried out for both exclusive breastfeeding and  
15 any breastfeeding. The final model was chosen using the AIC and the best fit model comprised the  
16 variables: Previous breastfeeding, Intention to breastfeed, Total IIFAS score and Major  
17 occupational group [based on ONS groups reclassified into four broad groupings](#). Neither Age nor  
18 SIMD were included in the final model as these are strongly correlated with occupation and  
19 previous breastfeeding. Those women who initiated breastfeeding and had higher IIFAS scores  
20 were highly significantly less likely to stop breastfeeding whether 'exclusive' or 'any' breastfeeding  
21 (Table 4). Those with higher intention scores had much greater duration than those with lower  
22 intention scores and were significantly associated with lower risk of stopping 'exclusive' or 'any'  
23 breastfeeding, with a 29% and 43% lower risk respectively.

24 In the final model there was also a trend across the occupations with lower breastfeeding in the  
25 routine and manual occupations. Parity was not such a strong predictor once intentions and IOWA  
26 score were included. The two most significant predictors of not stopping (for both exclusive and  
27 any breastfeeding) were high intention score and high IIFAS score (Table 4). The c-statistics for  
28 both models were  $c = 0.649$  (95% CI 0.605 to 0.693) and  $c = 0.689$  (95% CI 0.641 to 0.875) for  
29 'exclusive' and 'any' breastfeeding respectively. In these models the IDI was highest for the IIFAS  
30 with IDI=0.077 for 'exclusive' and IDI=0.074 for 'any' breastfeeding respectively. In contrast,  
31 although a statistically significant predictor, the IDI was negligible for intentions from the TPB  
32 questionnaire.

### 30 Discussion

31  
32 As far as can be established this is the first study of infant feeding in the weeks following birth  
33 using antenatal data gathered prospectively in real time in a large cohort. In order to achieve this,  
34 a novel method of collecting data via SMS text messaging was successfully developed, validated  
35 and utilised. This data collection method was demonstrated to have excellent reliability and  
36 validity.<sup>24</sup>

37 A sample with a broadly similar overall SIMD profile to pregnant women in Dundee in 2009 was  
38 recruited with good representation from deprived areas which is often a problem in studying  
39 breastfeeding. Excellent follow-up through each phase of the study was achieved, and the  
40 quantitative phase was complemented by a large amount of qualitative data gathered from a  
41 diverse sample of participants with a range of feeding experiences.<sup>25</sup>

42 Our cohort's figures for breastfeeding are broadly consistent with national and local rates of  
43 breastfeeding. 68% of the sample started breastfeeding compared to local figures 59% (local  
44 maternity database, 2009). Over the 6 – 8 weeks period 29.1% – 33.9% were exclusively  
45 breastfeeding and 44.1% – 48.3% were offering some breast milk. In comparison, Dundee City  
46 figures were: exclusive = 23.3%, and any = 33.4%; while the exclusive breastfeeding figure at 6-8  
47 weeks for Scotland was 26.5%.<sup>27</sup> The generally higher rates at all time-points may be accounted  
48 for by the slightly higher numbers of women in our study from more affluent areas, while the  
49 national Infant Feeding Survey data is based on retrospective reports.<sup>7</sup> [The texting in itself may  
50 have acted as an intervention to encourage continuation of breastfeeding.](#) It is also possible that  
51 our figures are more accurate as they are based on prospective real-time texts from the women.  
52 Overall, the consistency with known official statistics lends added validity to our results.

53 The mean score on the IIFAS (58.8, SD 9.36) was similar to that reported by de la Mora (1999)<sup>11</sup>  
54 The dichotomous nature of the 'Intentions' variable suggests that in the latter stages of pregnancy  
55 most women are clear about how they plan to feed their baby, with only a few being undecided. As  
56 in previous studies of breastfeeding using the TPB, intentions were explained by PBC, attitudes and  
57 the IOWA score with demographic variables accounting for less of the variance.<sup>11, 28, 29, 30</sup>

1  
2  
3  
4  
5  
6  
7  
8 The Kaplan-Meier plots show the expected pattern of breastfeeding cessation, with the steepest  
9 drop-off occurring in the first couple of weeks after birth in all women for exclusive breastfeeding.  
10 However, large differences in the duration of breastfeeding could be observed between groups. In  
11 particular parous women with no previous breastfeeding experience stopped very quickly after  
12 birth, while primiparous women showed a similar pattern of duration to those parous women who  
13 did have previous breastfeeding experience so prior experience of breastfeeding is a strong  
14 predictor. This is similar to the findings of the recent Scottish Infant Feeding Survey data from  
15 2010.<sup>7</sup>

16 In the prediction models, [as others have found](#),<sup>31</sup> while demographic measures were important,  
17 the measures of intention (TPB) and attitude to breastfeeding (IIFAS score) were the strongest  
18 predictors of both initiation and stopping breastfeeding. However, intention was stronger for  
19 initiating breastfeeding, while attitude was stronger for persevering with breastfeeding. This has  
20 important clinical implications. We suggest that the current interpretation of the UNICEF Baby  
21 Friendly guidelines should be revisited. Our findings indicate that a discussion with women about  
22 their intentions, in combination with an exploration of their attitude to formula feeding and  
23 breastfeeding (perhaps through use of the IIFAS) could be a powerful way of identifying those  
24 women who might need more help and support with both initiating and persevering with  
25 breastfeeding. The findings also lend weight to the targeting of younger women and women from  
26 lower socioeconomic backgrounds both for extra encouragement to breastfeed and for additional  
27 breastfeeding support. [Similar to other studies that have measured PBC in pregnancy, PBC was not  
28 a significant independent predictor of breastfeeding initiation.<sup>31,32</sup> However, unlike McMillan et al<sup>31</sup>  
29 we found that PBC was a weaker predictor of continuation than attitudes. Questions remain about  
30 the best time to measure PBC in relation to breastfeeding and the measures that should be used.](#)

### 31 **Importance to NHS and possible implementation**

32 Breastfeeding is known to have significant short and long-term health benefits for both mother and  
33 infant. Increasing the number of breastfed babies through targeted interventions has potential to  
34 prevent future ill-health, save the NHS money and is congruent with Government policy.<sup>303-325</sup> The  
35 findings of this study can be used both to identify women who need additional support and to  
36 inform the design of interventions to promote and support breastfeeding [using a prediction model](#).  
37 Antenatal and public health interventions should aim to improve attitudes to breastfeeding  
38 generally and improve women's confidence in their ability to breastfeed. There is a need to target  
39 primigravidae during pregnancy and in the early postnatal days and weeks: as success with  
40 breastfeeding in the first pregnancy is likely to lead to more chance of feeding successfully in  
41 subsequent pregnancies. Parous women with no previous breastfeeding experience need the most  
42 support as they are most likely to give up quickly. The use of antenatal measures of intention and  
43 attitude to breastfeeding might be useful to identify women who are likely to need more support in  
44 the early days and weeks after delivery. Increased levels of support, perhaps from other women  
45 who have successfully breastfed might be an effective intervention strategy.

### 46 **Future research**

47 This study has followed phase 1 of the MRC process, that is, collection of initial data and  
48 determining predictors of outcome.<sup>23</sup> The next stage will be to develop a complex interventions  
49 based on these findings both to improve rates of initiation of breastfeeding and to provide targeted  
50 support to those who commence breastfeeding. In addition, the discriminative ability for initiation  
51 was excellent but only moderate for stopping breastfeeding, while intention (TPB) was most  
52 important for initiating and attitude (IIFAS) most important for persevering with breastfeeding. This  
53 suggests there may be further factors in stopping that could be [investigated; future studies could  
54 explore this issue.](#)

55 This study demonstrated the benefits of SMS messaging to collect data and so can easily be used in  
56 other studies to collect similar data. In addition text messaging may have potential as a cost-  
57 effective and convenient way to provide health information and support messages as part of a

1  
2  
3  
4  
5  
6  
7  
8 complex intervention. These suggestions could apply to breastfeeding, as well as having  
9 application in many other health arenas.

## 10 **Conclusions**

11 This landmark study used SMS text messaging to gather real-time data on infant feeding from birth  
12 to 16 weeks postnatal. It provides the most detailed and comprehensive data on the form and  
13 method of infant feeding. The results are consistent with Scottish national figures, hence enhancing  
14 the validity of our findings.

15 The construct of 'Intentions' (from the TPB) and a measure of attitude to breastfeeding (the IIFAS  
16 score) have been shown to be important in predicting future infant feeding behaviour, as well as  
17 socioeconomic background. Primigravidae and parous women with no previous breastfeeding  
18 experience are likely to need the most support as these groups are least likely to commence  
19 breastfeeding, and most likely to stop early.

## 20 **Acknowledgements**

21 We thank NHS Tayside colleagues: especially the Community Midwives in Dundee,  
22 Danke McLeod, who supplied the delivery and discharge data,  
23 Child Health for information about stillbirths and neonatal deaths,  
24 Massimo Brillante, software programmer in Health Informatics Centre  
25 (<http://medicine.dundee.ac.uk/hic>).

26 We also thank women who consented to take part and who generously gave their time.

27 **Contributors:** PTD designed the study, supervised the statistical analysis, drafted the final paper  
28 and approved the final version; JD designed the study, involved in design of collection tools,  
29 commented on drafts and approved the final version; AS designed the study, contributed to  
30 collection tools, commented on drafts and approved the final version; PR carried out the statistical  
31 analysis, contributed to drafts and approved the final version; EM-H involved in design of collection  
32 tools, collected data, commented on drafts and approved the final version; GK involved in design of  
33 collection tools, collected data, commented on drafts and approved the final version; JW designed  
34 the study, supervision of the data collection, commented on drafts and approved the final version;  
35 HMW designed the study, involved in design of data collection tools, supervised the study as PI,  
36 commented on drafts and approved the final version.

37 **Ethics approval:** The study was granted approval by the NHS Tayside Research  
38 Ethics Committee on 08.07.2009 under reference 09/S1402/28.

39 **Funding:** Financial support for the submitted work was based on a grant from the Chief Scientist  
40 Office of Scotland (CZH/4/568).

41 **Competing Interests:** All authors have completed the ICMJE uniform disclosure form at  
42 [www.icmje.org/coi\\_disclosure.pdf](http://www.icmje.org/coi_disclosure.pdf) and declare: Financial support for the submitted work was based  
43 on a grant from the Chief Scientist Office of Scotland (CZH/4/568).  
44 PTD has received research grants from Otsuka, GSK and Pfizer, provides statistical support to the  
45 Scottish Medicines Consortium, has received royalties for predictive algorithms from Arhidia  
46 Informatics; JCW has received book royalties from Springer publishing; no other relationships or  
47 activities that could appear to have influenced the submitted work.

48 **Data sharing:** No additional data are available.

49 The Corresponding Author has the right to grant on behalf of all authors and does grant on behalf  
50 of all authors, [a worldwide licence](#) to the Publishers and its licensees in perpetuity, in all forms,  
51 formats and media (whether known now or created in the future), to i) publish, reproduce,  
52 distribute, display and store the Contribution, ii) translate the Contribution into other languages,  
53 create adaptations, reprints, include within collections and create summaries, extracts and/or,  
54 abstracts of the Contribution, iii) create any other derivative work(s) based on the Contribution, iv)  
55 to exploit all subsidiary rights in the Contribution, v) the inclusion of electronic links from the

Contribution to third party material where-ever it may be located; and, vi) licence any third party to do any or all of the above."

## References

1. Howie P, Forsyth J, Ogston S, Clark A, du V Florey C. Protective effect of breastfeeding against infection. *BMJ*. 1990; 300: 11 – 16.
2. Kramer MS, Kakuma R. Optimal duration of exclusive breastfeeding. *Cochrane Database of Systematic Reviews* 2002, Issue 1. Art. No.: CD003517. DOI: 10.1002/14651858.CD003517.
3. Ip S, Chung M, Raman G, Chew P, Magula N, DeVine D. Breastfeeding and Maternal and Infant Health Outcomes in Developed Countries [Agency for Healthcare Research and Quality \(US\) Evidence Reports/Technology Assessments, 2007, No. 153](#) (<http://www.ncbi.nlm.nih.gov/books/NBK38337/>)
4. Duijts L, Ramadhani M, Moll H. Breastfeeding protects against infectious diseases during infancy in industrialized countries. A systematic review. *Maternal and Child Nutrition*. 2009; 5: 199 – 210.
5. World Health Organisation, 2011a. Exclusive breastfeeding for six months best for babies everywhere. ([http://www.who.int/mediacentre/news/statements/2011/breastfeeding\\_20110115/en/index.html](http://www.who.int/mediacentre/news/statements/2011/breastfeeding_20110115/en/index.html))
6. World Health Organisation, 2011b. WHO Global Health Indicators 2011. [http://www.who.int/gho/publications/world\\_health\\_statistics/EN\\_WHS2011\\_Part2.pdf](http://www.who.int/gho/publications/world_health_statistics/EN_WHS2011_Part2.pdf)
7. Health and Social Care Information Centre (HSCIC) (2012) Infant Feeding Survey 2010. Health and Social Care Information Centre, IFF Research <http://www.ic.nhs.uk/pubs/infantfeeding10final> (accessed 23.11.12)
8. The Scottish Government 2007. Better Health, Better Care. The Scottish Government: Edinburgh
9. ISD Scotland 2011, Breastfeeding Statistics. Information and Statistics Division <http://www.isdscotland.org/Health-Topics/Child-Health/Publications/2011-10-25/2011-10-25-Breastfeeding-Summary.pdf?40969485045> (accessed 17.5.12)
10. McInnes R, Love J, Stone D. Independent predictors of breastfeeding intention in a disadvantaged population of pregnant women. *BMC Public Health* 2001; 1: 10. <http://www.biomedcentral.com/1471-2458/1/10>
11. de La Mora A, Russell D, Dungy C, Losch M, Dusdieker L. The Iowa Infant Feeding Attitude Scale: analysis of reliability and validity. *Journal of Applied Social Psychology* 1999; 29: 2362 – 2380.
12. Scott J, Binns C, Oddy W, Graham K. Predictors of breastfeeding duration: evidence from a cohort study. *Pediatrics* 2006; 117: e646 – e655.
13. Scott J, Shaker I, Reid M. Parental attitudes toward breastfeeding: their association with feeding outcome at hospital discharge. *Birth*. 2004; 31: 125 – 131.
14. Dungy C, McInnes R, Tappin D, Wallis A, Oprescu F. Infant feeding attitudes and knowledge among socioeconomically disadvantaged women in Glasgow. *Maternal Child Health Journal*. 2008; 12: 313 – 322.
15. Sittlington J, Stewart-Knox B, Wright M, Bradbury I, Scott J. Infant-feeding attitudes of expectant mothers in Northern Ireland. *Health Education Research*. 2007; 22(4): 561 – 570.
16. Wallis AB, Brinzaniuc A, Chereches R, Oprescu F, Sirlincan E, David I, et al. Reliability and validity of the Romanian version of a scale to measure infant feeding attitudes and knowledge. *Acta Paediatrica*. 2008; 97: 1194 – 1199.
17. UNICEF (nd) Baby Friendly Initiative <http://www.unicef.org.uk/BabyFriendly/>
18. Beake S, Brinzaniuc A, Chereches R, Oprescu F, Sirlincan E, David I. A systematic review of structured compared with non-structured breastfeeding programmes to support the initiation and duration of exclusive and any breastfeeding in acute and primary health care settings. *Maternal and Child Nutrition*. 2012; 8: 141 – 161.
19. Kramer M, Chalmers B, Hodnett E, Sevkovskaya Z, Dzikovich I, Shapiro S, et al. Promotion of breastfeeding intervention trial (PROBIT). A randomized trial in the Republic of Belarus. *JAMA*; 2001; 285: 413-420.
20. Tappin DM, Mackenzie J, Brown A, Girdwood R, Britten J, Broadfoot M, et al. Breastfeeding rates are increasing in Scotland. *Health Bulletin* 2001; 59(2): 102-107.

- 1  
2  
3  
4  
5  
6  
7  
8 21. UNICEF 2011. How to implement baby friendly standards: A guide for maternity settings  
UNICEF UK Baby Friendly Initiative, London.  
9 [http://www.unicef.org.uk/Documents/Baby\\_Friendly/Guidance/Implementation%20Guidance/Implementation\\_guidance\\_maternity\\_web.pdf](http://www.unicef.org.uk/Documents/Baby_Friendly/Guidance/Implementation%20Guidance/Implementation_guidance_maternity_web.pdf)
- 10 22. Ajzen, I. The Theory of Planned Behavior. *Organizational Behavior and Human Decision Processes* 1991; 50: 179 - 211.
- 11 23. Campbell NC, Murray E, Darbyshire J, Emery J, Farmer A, Griffiths F, et al. 2007. Designing  
12 and evaluating complex interventions to improve health care. *BMJ* 2007; 334: 455 - 459.
- 13 24. Whitford H, Donnan P, Symon A, Kellett G, Monteith-Hodge E, Rauchhaus P, et al.  
14 Evaluating the reliability, validity, acceptability and practicality of SMS text messaging as a  
15 tool to collect research data: results from the Feeding Your Baby project. *Journal of the  
16 American Medical Informatics Association*. amiajnl-2011-000785 Published Online First: 26  
17 April 2012
- 18 25. Symon AG, Whitford H, Dalzell J. Infant feeding in Eastern Scotland: A longitudinal mixed  
19 methods evaluation of antenatal intentions and postnatal satisfaction —The Feeding Your  
20 Baby study. *Midwifery* 2012, <http://dx.doi.org/10.1016/j.midw.2012.06.017>
- 21 ~~25-26.~~ [Standard Occupational Classification 2010 \(SOC\) Office for National Statistics](http://www.ons.gov.uk/ons/guide-method/classifications/current-standard-classifications/soc2010/index.html)  
22 <http://www.ons.gov.uk/ons/guide-method/classifications/current-standard-classifications/soc2010/index.html> (accessed 17.5.12)
- 23 ~~26-27.~~ Pencina MJ, D'Agostino RB Sr, D'Agostino RB Jr. Evaluating the predictive ability of a  
24 new marker: From area under the ROC curve to reclassification and beyond. *Stat Med* 2008;  
25 27: 157-72.
- 26 ~~27-28.~~ ISD Scotland 2011, Breastfeeding Statistics. Information and Statistics Division  
27 <http://www.isdscotland.org/Health-Topics/Child-Health/Publications/2011-10-25/2011-10-25-Breastfeeding-Summary.pdf?40969485045> (accessed 17.5.12)
- 28 ~~28-29.~~ McMillan B, Conner M, Woolridge M, Dyson L, Green J, Renfrew M, et al. Predicting  
29 breastfeeding in women living in areas of economic hardship: explanatory role of the theory  
30 of planned behaviour. *Psychology and Health*. 2008; 23(7): 767 - 788.
- 31 30. Blyth R, Creedy D, Dennis, C, Moyle W, Pratt J, De Vries S. Effect of maternal confidence on  
32 breastfeeding duration: an application of the breastfeeding self-efficacy theory. *Birth* 2002;  
33 29: 278 - 284
- 34 ~~31.~~ [McMillan B, Conner M, Woolridge M, Dyson L, Green J, Renfrew M, Bharj K, Clarke G. Predicting breastfeeding in women living in areas of economic hardship: Explanatory role of the theory of planned behaviour. \*Psychology and Health\* 2008; 23: 767 - 788.](#)
- 35 ~~29-32.~~ [Wambach K. Breastfeeding intention and outcome: A test of the theory of planned behavior. \*Research in Nursing and Health\* 1997; 20: 51 - 59.](#)
- 36 ~~30-33.~~ The Scottish Government. 2011a. A Refreshed Framework for Maternity Care in  
37 Scotland. The Maternity Services Action Group. Edinburgh: The Scottish Government
- 38 ~~31-34.~~ The Scottish Government. 2011b. Reducing Antenatal Health Inequalities. Outcome  
39 Focused Evidence into Action Guidance. Edinburgh: The Scottish Government
- 40 ~~32-35.~~ Renfrew M, Pokhrel S, Quigley M, McCormick F, Fox-Rushby J, Dodds R, et al.  
41 Preventing disease and saving resources: the potential contribution of increasing  
42 breastfeeding rates in the UK. UNICEF, UK, 2012.  
43 [http://www.unicef.org.uk/Documents/Baby\\_Friendly/Research/Preventing\\_disease\\_saving\\_r  
44 esources.pdf](http://www.unicef.org.uk/Documents/Baby_Friendly/Research/Preventing_disease_saving_resources.pdf) (accessed 17.5.12)

Formatted: Font: Verdana

Field Code Changed

Formatted: Hyperlink, Font: Verdana

Formatted: Font: Verdana

1  
2  
3  
4  
5  
6  
7  
8  
9  
10  
11  
12  
13  
14  
15  
16  
17  
18  
19  
20  
21  
22  
23  
24  
25  
26  
27  
28  
29  
30  
31  
32  
33  
34  
35  
36  
37  
38  
39  
40  
41  
42  
43  
44  
45  
46  
47  
48  
49  
50  
51  
52  
53  
54  
55  
56  
57  
58  
59  
60

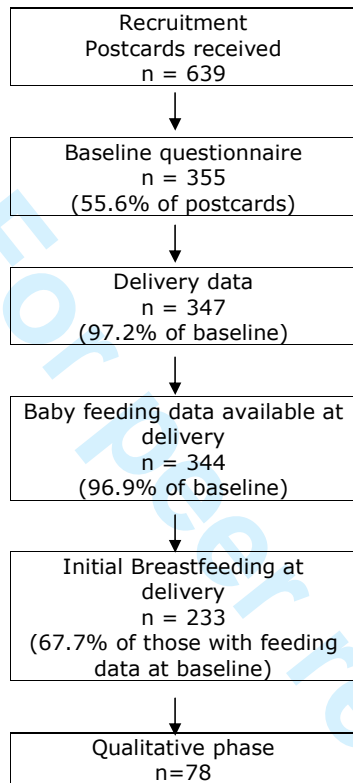

Figure 1: Flow chart of participant recruitment

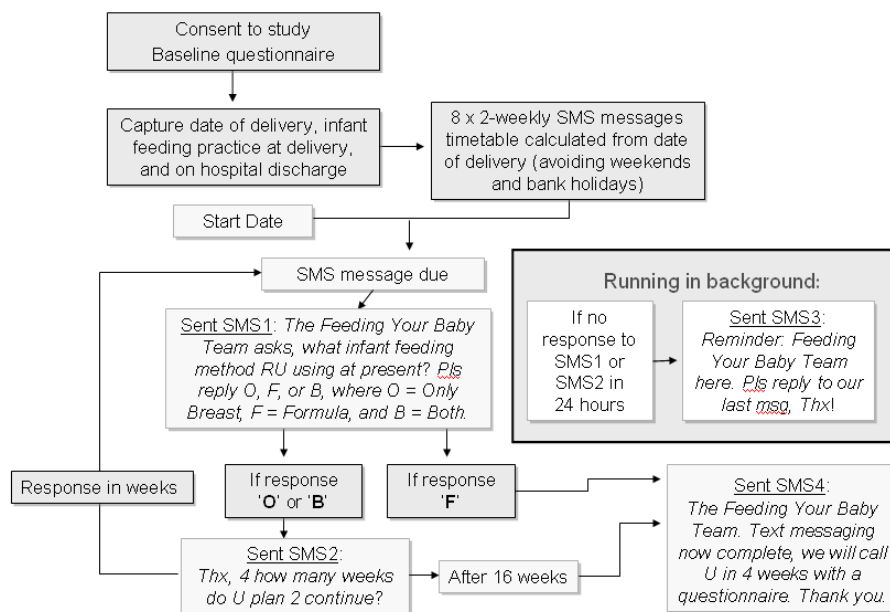

Figure 2: Schedule of SMS messages



1  
2  
3  
4  
5  
6  
7  
8  
9  
10  
11  
12  
13  
14  
15  
16  
17  
18  
19  
20  
21  
22  
23  
24  
25  
26  
27  
28  
29  
30  
31  
32  
33  
34  
35  
36  
37  
38  
39  
40  
41  
42  
43  
44  
45  
46  
47  
48  
49  
50  
51  
52  
53  
54  
55  
56  
57  
58  
59  
60

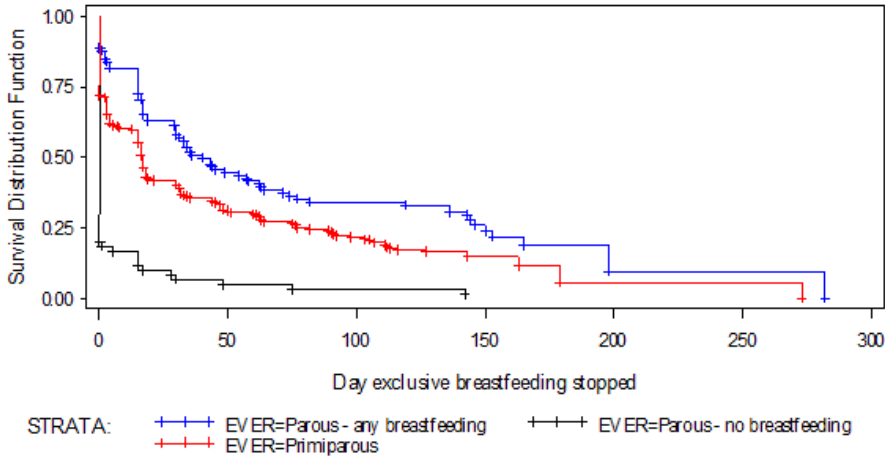

Figure 3a: Time to end of exclusive breastfeeding (WHO) in all women

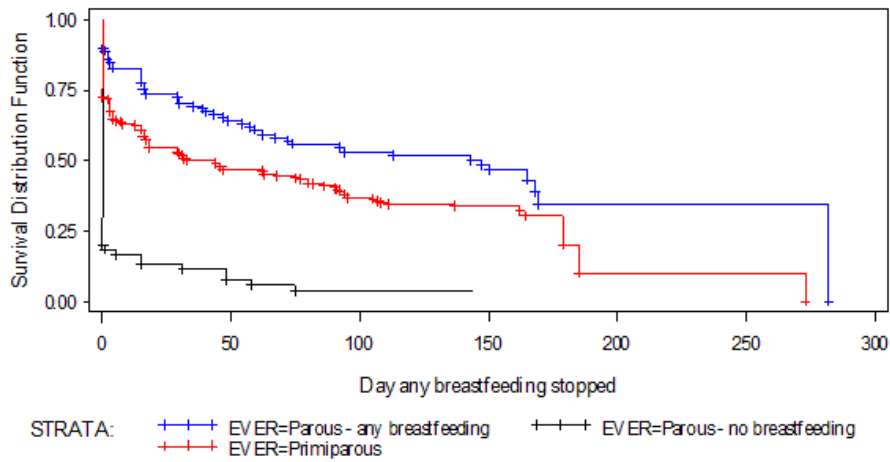

Figure 3b: Time to end of any breastfeeding in all women

**Table 1: Characteristics of Women by feeding method at Baseline delivery (n = 344)**

|                                                                   | Women who did not<br>initiate breastfeeding (n<br>= 111)<br>*Mean (SD) or<br>**% (N) | Women who initiated<br>breastfeeding (n = 233)<br>Mean (SD) or % (N) |
|-------------------------------------------------------------------|--------------------------------------------------------------------------------------|----------------------------------------------------------------------|
| Gestation at baseline (weeks)*                                    | 32.5 (5.328)                                                                         | 31.7 (5.91)                                                          |
| Age (years)*                                                      | 26.6 (6.21)                                                                          | 29.6 (5.42)                                                          |
| Years since leaving school*                                       | 15.9 (2.83)                                                                          | 17.9 (1.83)                                                          |
| Relationship status**                                             |                                                                                      |                                                                      |
| Single                                                            | 22.5 (25)                                                                            | 5.2 ( 12)                                                            |
| Married                                                           | 29.7 (33)                                                                            | 55.8 (130)                                                           |
| With partner                                                      | 46.8 (52)                                                                            | 38.6 ( 90)                                                           |
| Other                                                             | 0.0 ( 0)                                                                             | 0.4 ( 1)                                                             |
| Missing                                                           | 0.9 ( 1)                                                                             | 0.0 ( 0)                                                             |
| Living status**                                                   |                                                                                      |                                                                      |
| On own                                                            | 17.1 (19)                                                                            | 2.6 ( 6)                                                             |
| With husband or partner                                           | 58.6 (65)                                                                            | 89.3 (208)                                                           |
| With parents                                                      | 15.3 (17)                                                                            | 5.2 ( 12)                                                            |
| Other                                                             | 6.3 ( 7)                                                                             | 1.3 ( 3)                                                             |
| Missing                                                           | 2.7 ( 3)                                                                             | 1.7 ( 4)                                                             |
| Parity**                                                          |                                                                                      |                                                                      |
| First child                                                       | 45.0 (50)                                                                            | 54.5 (127)                                                           |
| Second child                                                      | 30.6 (34)                                                                            | 29.2 ( 68)                                                           |
| Third child or more                                               | 21.6 (24)                                                                            | 12.5 ( 29)                                                           |
| Missing                                                           | 2.7 ( 3)                                                                             | 3.9 ( 9)                                                             |
| Previous breastfeeding experience                                 |                                                                                      |                                                                      |
| Primiparous                                                       | 47.7 (53)                                                                            | 58.4 (136)                                                           |
| Parous – no previous<br>breastfeeding experience                  | 43.2 (48)                                                                            | 5.2 (12)                                                             |
| Parous – previous breastfeeding<br>experience                     | 9.0 (10)                                                                             | 36.5 (85)                                                            |
| Missing                                                           | 0.0 ( 0)                                                                             | 0.0 ( 0)                                                             |
| SIMD Quintile**                                                   |                                                                                      |                                                                      |
| Quintile 1 (most deprived)                                        | 47.7 (53)                                                                            | 30.5 (71)                                                            |
| Quintile 2                                                        | 20.7 (23)                                                                            | 10.3 (24)                                                            |
| Quintile 3                                                        | 8.1 ( 9)                                                                             | 12.4 (29)                                                            |
| Quintile 4                                                        | 15.3 (17)                                                                            | 30.9 (72)                                                            |
| Quintile 5 (most affluent)                                        | 7.2 ( 8)                                                                             | 15.9 (37)                                                            |
| Missing                                                           | 0.9 ( 1)                                                                             | 0.0 ( 0)                                                             |
| Occupations**                                                     |                                                                                      |                                                                      |
| Higher managerial, administrative<br>and professional occupations | 24.3 (27)                                                                            | 60.1 (140)                                                           |
| Intermediate occupations                                          | 16.2 (18)                                                                            | 12.0 ( 28)                                                           |
| Routine and manual occupations                                    | 18.9 (21)                                                                            | 11.6 ( 27)                                                           |
| Not in paid employment                                            | 34.2 (38)                                                                            | 15.5 ( 36)                                                           |
| Missing                                                           | 6.3 ( 7)                                                                             | 0.9 ( 2)                                                             |
| Total IIFAS score                                                 | 49.8 (6.29)                                                                          | 62.8 (7.46)                                                          |

|                                                                               | Women who did not<br>initiate breastfeeding (n<br>= 111)<br>*Mean (SD) or<br>**% (N) | Women who initiated<br>breastfeeding (n = 233)<br>Mean (SD) or % (N) |
|-------------------------------------------------------------------------------|--------------------------------------------------------------------------------------|----------------------------------------------------------------------|
| TPB score 1: Attitude to<br>breastfeeding                                     | 2.6 (0.76)                                                                           | 4.2 (0.68)                                                           |
| TPB score 2: Subjective norm                                                  | 2.2 (0.3)                                                                            | 3.3 (1.0)                                                            |
| TPB score 3: Perceived behavioural<br>control                                 | 2.6 (0.84)                                                                           | 3.8 (0.76)                                                           |
| TPB score 4: Intention to breastfeed <sup>†</sup>                             | 1.7 (0.96)                                                                           | 4.4 (0.96)                                                           |
| TPB score 4: Intention to breastfeed<br>categorical (% (number)) <sup>∞</sup> |                                                                                      |                                                                      |
| No breastfeeding intended                                                     | 60.4 (67)                                                                            | 3.0 ( 7)                                                             |
| Undecided                                                                     | 38.7 (43)                                                                            | 45.1 (105)                                                           |
| Definite breastfeeding intended                                               | 0.0 ( 0)                                                                             | 51.9 (121)                                                           |
| Missing                                                                       | 0.9 ( 1)                                                                             | 0.0 ( 0)                                                             |

Formatted: Superscript

Formatted: Superscript

<sup>†</sup>: on a scale of 1 – 5

<sup>∞</sup>: 1 = No breastfeeding intended; 2 – 4 = Undecided; 5 = Definite breastfeeding intended

Table 2 Results of Multiple Logistic Regression of factors associated with initiating breast feeding (n = 344)

| Variable                                  | ORR (95% CI)                     | Chi Squared | p-value |
|-------------------------------------------|----------------------------------|-------------|---------|
| Age (years)                               | 1.114 [1.003 to 1.2437]          | 4.077       | 0.044   |
| <b>Parity</b>                             |                                  |             |         |
| Parous - no breastfeeding vs Primiparous  | 0.2182 [0.12052 to 0.86369]      | 7.798       | 0.005   |
| Parous - any breastfeeding vs Primiparous | 2.67015 [0.1547 to 76.18426]     | 5.294       | 0.021   |
| TPB score 4: Intention to breastfeed      | 4.6768 [2.9109 to 7.491]         | 40.759      | <.0001  |
| Total IIFAS Score                         | 1.173 [1.0658 to 1.309]          | 9.238       | 0.002   |
| <b>Living Status</b>                      |                                  |             |         |
| With husband or partner vs On own         | 136.07862 [2.07241 to 8517.7228] | 10.806      | 0.001   |
| With parents vs On own                    | 31.5545 [0.3879 to 336.27171]    | 0.381       | 0.537   |
| Other vs On own                           | 0.24554 [0.0321 to 142.27686]    | 1.542       | 0.214   |

**Table 3: Predicted breastfeeding rates at different timepoints according to parity and any breastfeeding of previous children (from SMS data n = 344)**

|                                                 | Time           | Exclusive Breastfeeding |                | Any Breastfeeding |                |
|-------------------------------------------------|----------------|-------------------------|----------------|-------------------|----------------|
|                                                 |                | %                       | CI             | %                 | CI             |
| All                                             | Baseline       | 67.6                    | [0.62 to 0.72] | 68.2              | [0.63 to 0.73] |
|                                                 | 6 weeks        | 33.9                    | [0.29 to 0.39] | 48.3              | [0.43 to 0.53] |
|                                                 | 8 weeks        | 29.1                    | [0.24 to 0.34] | 44.1              | [0.39 to 0.49] |
|                                                 | 16 weeks       | 20.4                    | [0.16 to 0.25] | 34.5              | [0.29 to 0.40] |
|                                                 | Exit Interview | 3.3                     | [0.00 to 0.12] | 8.5               | [0.01 to 0.27] |
| Primiparous                                     | Baseline       | 71.7                    | [0.65 to 0.78] | 72.3              | [0.65 to 0.78] |
|                                                 | 6 weeks        | 34.3                    | [0.28 to 0.41] | 50.1              | [0.43 to 0.57] |
|                                                 | 8 weeks        | 29.3                    | [0.23 to 0.36] | 46.7              | [0.39 to 0.54] |
|                                                 | 16 weeks       | 18.8                    | [0.14 to 0.25] | 34.5              | [0.28 to 0.41] |
|                                                 | Exit Interview | 5.8                     | [0.01 to 0.18] | 10.1              | [0.01 to 0.32] |
| Parous - no previous breastfeeding              | Baseline       | 20.0                    | [0.11 to 0.31] | 18.3              | [0.10 to 0.29] |
|                                                 | 6 weeks        | 5.0                     | [0.01 to 0.13] | 11.7              | [0.05 to 0.21] |
|                                                 | 8 weeks        | 5.0                     | [0.01 to 0.13] | 5.8               | [0.02 to 0.14] |
|                                                 | 16 weeks       | 3.9                     | [0.01 to 0.13] | 5.0               | [0.01 to 0.12] |
|                                                 | Exit Interview | 1.7                     | [0.00 to 0.08] | 3.9               | [0.01 to 0.12] |
| Parous - with previous breastfeeding experience | Baseline       | 88.8                    | [0.81 to 0.94] | 89.8              | [0.82 to 0.94] |
|                                                 | 6 weeks        | 46.6                    | [0.36 to 0.56] | 67.2              | [0.57 to 0.76] |
|                                                 | 8 weeks        | 41.4                    | [0.32 to 0.51] | 62.0              | [0.52 to 0.71] |
|                                                 | 16 weeks       | 33.0                    | [0.24 to 0.42] | 52.6              | [0.42 to 0.62] |
|                                                 | Exit Interview | 9.3                     | [0.01 to 0.28] | 34.6              | [0.21 to 0.49] |

**Table 4a: Final model using Cox Regression to predict stopping 'Exclusive' breastfeeding (n = 233)**

| Variable                                                       | Hazard Ratio | CI             | p-value |
|----------------------------------------------------------------|--------------|----------------|---------|
| Parous - any breastfeeding                                     | 0.873        | [0.63 to 1.21] | 0.4103  |
| Parous - no breastfeeding                                      | 0.809        | [0.41 to 1.58] | 0.5367  |
| Primiparous                                                    | 1.000        |                |         |
| Higher managerial, administrative and professional occupations | 0.726        | [0.46 to 1.15] | 0.1716  |
| Intermediate occupations                                       | 0.789        | [0.44 to 1.41] | 0.4246  |
| Routine and manual occupations                                 | 0.880        | [0.50 to 1.56] | 0.6601  |
| Not in paid employment                                         | 1.000        |                |         |
| TPB score 4: Intention to breastfeed (High vs low)             | 0.715        | [0.53 to 0.97] | 0.0317  |
| Total IIFAS Score (+ 10 units)                                 | 0.553        | [0.43 to 0.71] | <.0001  |

**Table 4b: Final model using Cox Regression to predict stopping 'Any' breastfeeding (n=233)**

| Variable                                                       | Hazard Ratio | CI             | p-value |
|----------------------------------------------------------------|--------------|----------------|---------|
| Parous - any breastfeeding                                     | 0.829        | [0.56 to 1.22] | 0.3426  |
| Parous - no breastfeeding                                      | 1.079        | [0.51 to 2.26] | 0.8403  |
| Primiparous                                                    | 1.000        |                |         |
| Higher managerial, administrative and professional occupations | 0.602        | [0.37 to 0.99] | 0.0457  |
| Intermediate occupations                                       | 0.622        | [0.32 to 1.21] | 0.1619  |
| Routine and manual occupations                                 | 0.714        | [0.37 to 1.39] | 0.3215  |
| Not in paid employment                                         | 1.000        |                |         |
| TPB score 4: Intention to breastfeed (High vs Low)             | 0.569        | [0.39 to 0.82] | 0.0026  |
| Total IIFAS Score (+ 10 units)                                 | 0.549        | [0.41 to 0.74] | <.0001  |

Appendix 2: Flowchart of recruitment and attrition to study

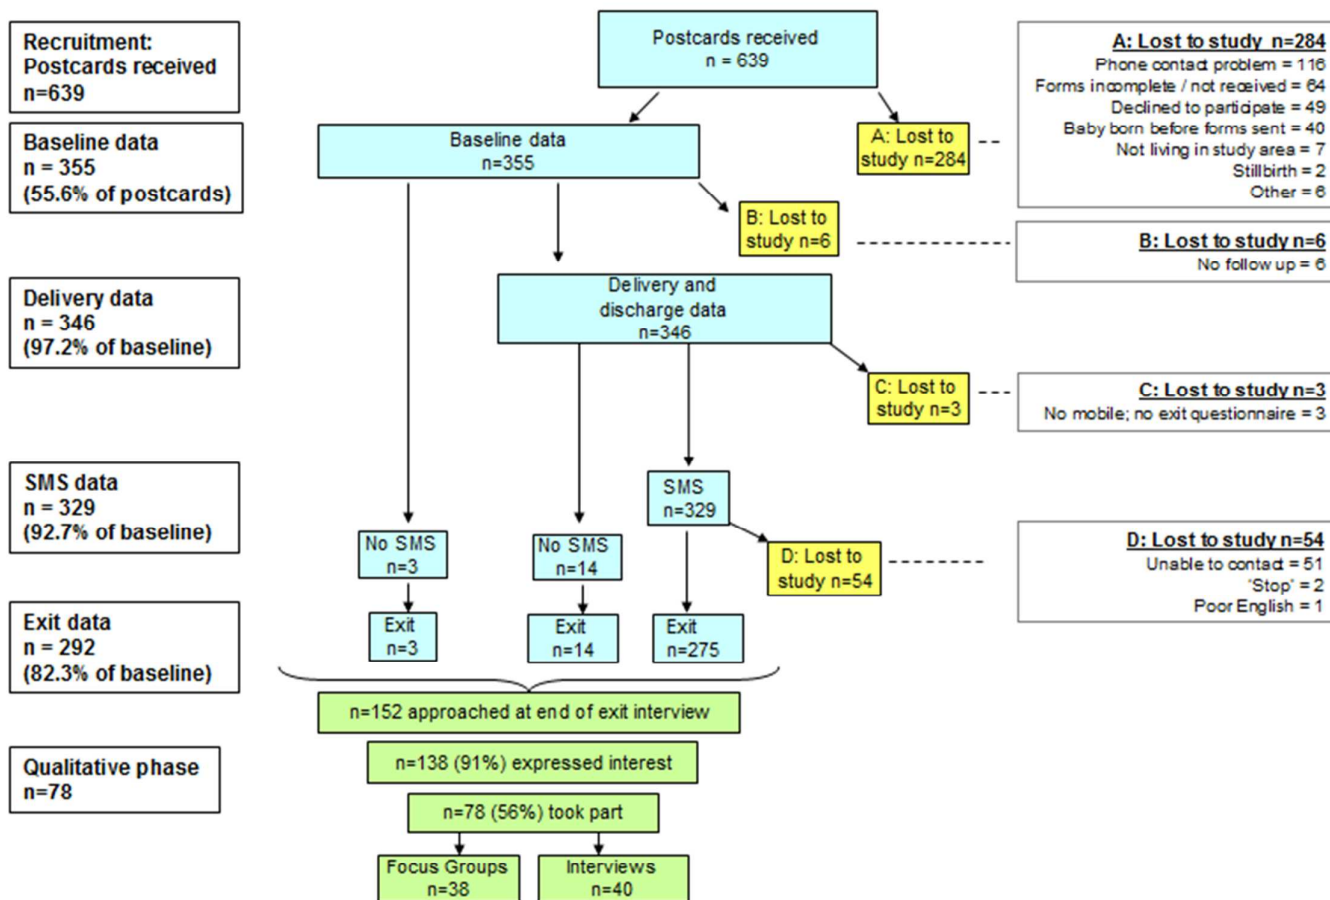

### Appendix 3: Theory of Planned Behaviour Variables

All variables measured on a scale of 1 – 5.

#### Attitude:

1. How beneficial do you think it would be to exclusively breastfeed your baby for 16 weeks? ('not at all' to 'extremely')
2. How beneficial do you think it would be to introduce your baby to other forms of feeding during the first 16 weeks? ('not at all' to 'extremely')
3. How much you would like to breastfeed until your baby is 16 weeks old? ('definitely would like' to 'definitely would not like')
4. How much do you care about whether you breast feed until the baby is 16 weeks old? ('not very much' to 'much as possible')

#### Social Norm:

5. How much would you try to breast feed until the baby is 16 weeks old over the next month in order to please your partner/ relative? ('not very much' to 'much as possible')
6. Do you think your partner/family feels you should breast feed until your baby is 16 weeks old? ('definitely should' to 'definitely should not')

#### Perceived behavioural control

7. How confident are you that you will breastfeed until your baby is 16 weeks old? ('not at all confident' to 'extremely confident')
8. How difficult will it be for you to breastfeed until your baby is 16 weeks old? ('not at all difficult' to 'extremely difficult')
9. How much control do you feel you have over whether you will breastfeed until your baby is 16 weeks old? ('no control at all' to 'complete control')

#### Intention

10. Do you intend to try to breast feed until the baby is 16 weeks old? ('definitely yes' to 'definitely no')
11. Do you plan to breast feed until the baby is 16 weeks old? ('definitely yes' to 'definitely no')
12. At this moment are you likely to breast feed until the baby is 16 weeks old? ('definitely yes' to 'definitely no')
13. Are you likely to breast feed until the baby is 16 weeks old? ('definitely yes' to 'definitely no')
