# Supplementary figures and images for: Prediction of initiation and cessation of breastfeeding from late pregnancy to 16 weeks: the Feeding Your Baby (FYB) cohort study
Source: HighWire-hosted journal article supplement (doi:10.1136/bmjopen-2013-003274), 2013-07-01

## Appendix 2: Flowchart of recruitment and attrition to study

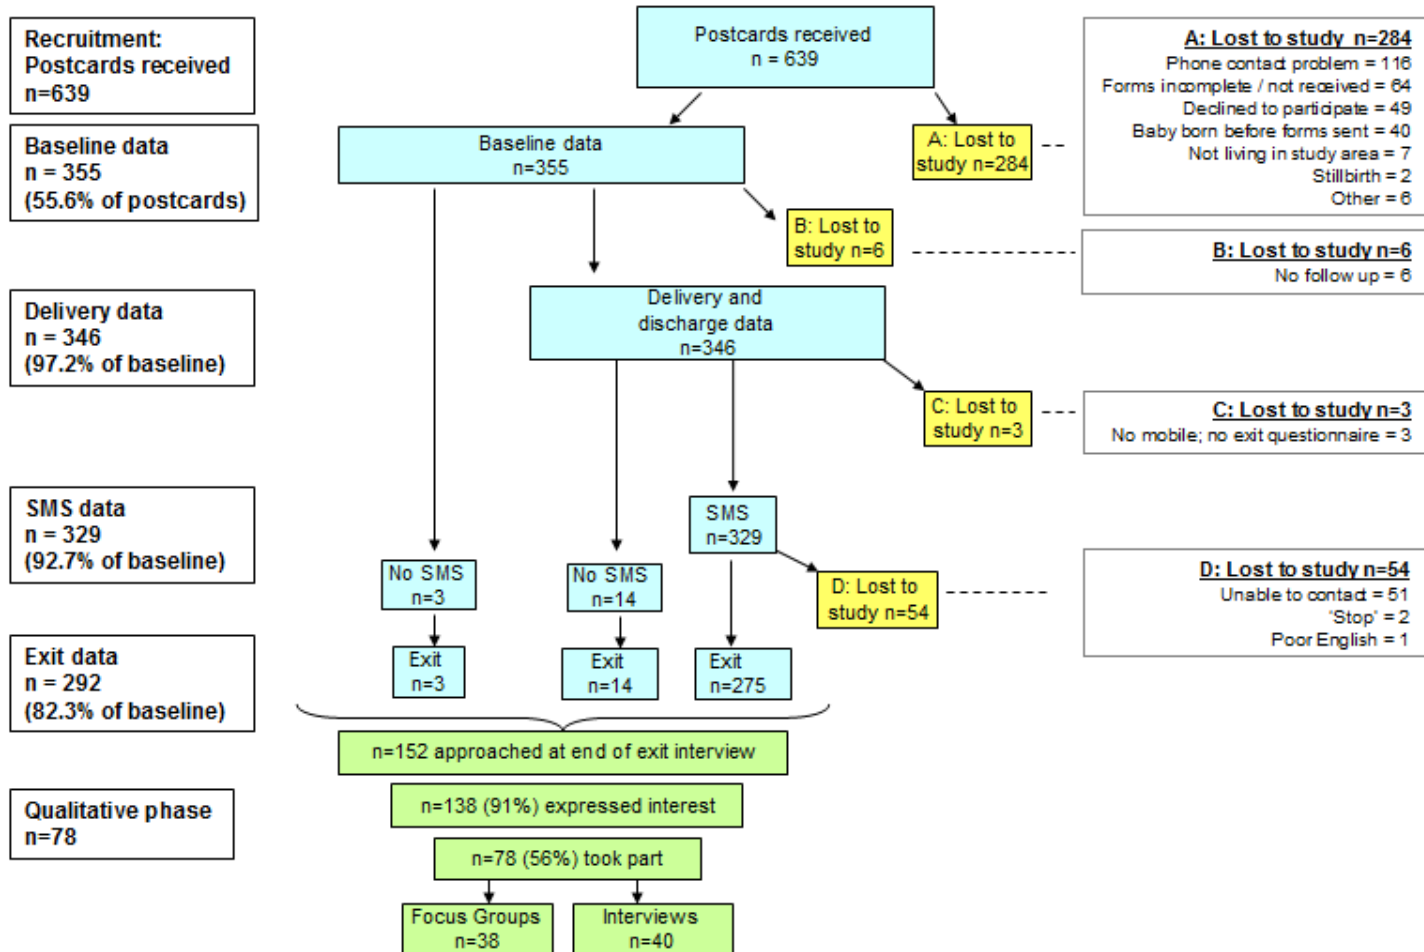

Supplement: bmjopen-2013-003274supp_appendix2.pdf [file bmjopen-2013-003274supp_appendix2.pdf]
